# Supplementary material for: Tunnelling assisted hydrogen elimination mechanisms of FeCl3/TEMPO
Source: Royal Society of Chemistry journal article supplement (doi:10.1039/d1cc06035j), 2021-12-02
Supplement: d1cc06035j1.pdf [file d1cc06035j1.pdf]

# Supporting Information

## Tunneling Assisted Hydrogen Elimination Mechanisms of FeCl<sub>3</sub>/TEMPO

*Shi-Jun Li<sup>a,b</sup>, Wei Fang<sup>c,d\*</sup>, Jeremy O. Richardson<sup>c\*</sup>, De-Cai Fang<sup>a\*</sup>*

<sup>a</sup>College of Chemistry, Beijing Normal University, Beijing 100875, China

<sup>b</sup>College of Chemistry and Molecular Engineering, Zhengzhou University, Zhengzhou  
450001, China

<sup>c</sup>Laboratory for Physical Chemistry, ETH Zurich, Zurich 8093, Switzerland

<sup>d</sup>State Key Laboratory of Molecular Reaction Dynamics and Center for Theoretical  
Computational Chemistry, Dalian Institute of Chemical Physics, Chinese Academy of  
Sciences, Dalian 116023, People's Republic of China

In the supplementary information we provide more computational details of the simulations reported in the manuscript and additional discussions in support of the conclusions reached. The contents are organised in the following order:

- I. Computation of the translation partition function in solution and dispersion
- II. Spin density data for the reactants and the transition states
- III. The reaction mechanisms and electronic energy profile along the intrinsic reaction coordinates for first step
- IV. Results for AlCl<sub>3</sub>/TEMPO
- V. Summary of the energy and free energy raw data
- VI. Coordinate data for all the optimized structures

## I. The translational partition in solution and dispersion.

The translational partition function is given by:

$$Q_t = \left(\frac{2\pi M k T}{h^2}\right)^{\frac{3}{2}} V = \left(\frac{M}{2\pi\beta\hbar^2}\right)^{\frac{3}{2}} V \quad (1)$$

Here  $V$  is calculated based on the ideal-gas equation,  $V=RT/P$ , assuming  $P$  with 1 atm in general. Such assumption is valid in the gas-phase, however,  $V$  needs to be redefined for molecules in solution. In order to estimate the translational partition function in solution, one can calculate the free volume that one solute molecule translates along three coordinate axes within a cavity formed by solvent molecules. The cavity volume ( $V1$ ) and molecule volume ( $V2$ ) can be estimated by the overlapping spheres(1) with our IDSCRF radii(2) and Bader radii,(3) respectively, as shown in Figure S1. Herein, each atom has its own individual sphere, including hydrogen atoms. In general, the molecule volume is defined as one inside a contour of 0.001 electron/bohr<sup>3</sup> density, however, a simple way to deal with molecule volume is via the overlapping spheres with Bader atomic radii, a distance from nuclear to a contour of 0.001 electron/bohr<sup>3</sup> electron density for each atom. According to the calculated entropies in solution for 141 common solvent molecules, the average overestimation of the molecular volume by simple method is *ca.* 12%, therefore, a scaling factor of 0.88 has been applied for calculating molecule volume  $V2$ . If one can approximate the cavity and solute molecule with a respective square cube, then free volume can be counted as  $V_f = (\sqrt[3]{V1} - \sqrt[3]{V2})^3$ . The solution translational entropy correction has been coded into our *THERMO*

program,(4) quite different from that generated directly from *Gaussian* 09 output. Such method has successfully been applied to calculate the activation entropies for typical chemical reactions in solution.(5-9)

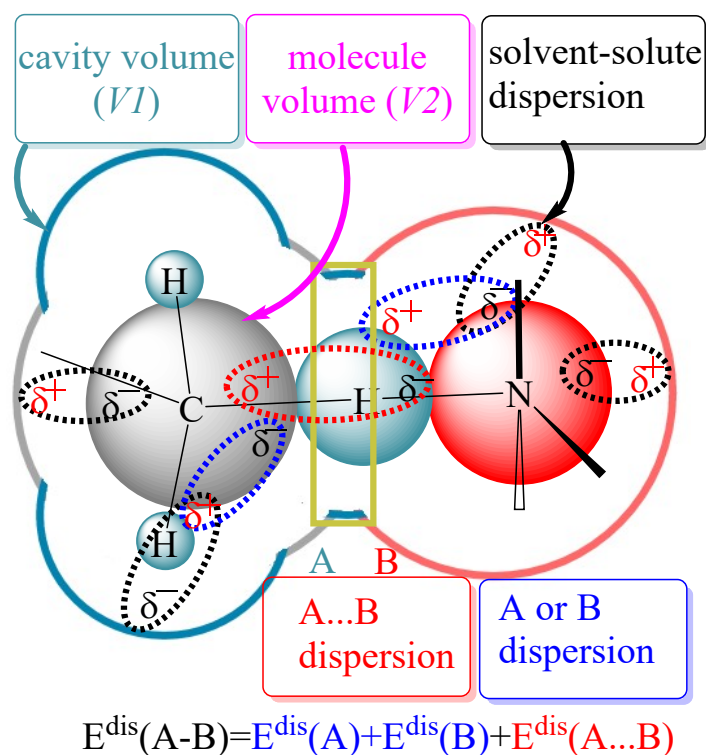

**Figure S1** The definition of cavity volume( $V1$ ) and molecular volume( $V2$ ), along with the description of intra-solute dispersion and solvent-solute dispersion.

In order to apply the present dispersion method into solutional systems, one need to consider the solvent-solute dispersion as well, which is not counted in default PCM calculation and is denoted as B3LYP-D3a+IDSCRF/TZP-DKH(-d<sub>fg</sub>) in this paper. The detailed information is described in **Figure S1**.

- (1) J. Busa, J. Dzurina, E. Hayryan, S. Hayryan, C.-K. Hu, J. Plavka, I. Pokorny, J. Skrivanek and M.-C. Wu, *Computer Physics Communications*, 2005, **165**, 59-96.
- (2) J.-Y. Tao, W.-H. Mu, G.A. Chass, T.-H. Tang and D.-C. Fang, *Int. J. Quantum Chem.* 2013, **113**, 975-984.
- (3) W.-H. Mu, G.A. Chass and D.-C. Fang, *Int. J. Quantum Chem.*, 2008, **108**, 1422-1434.
- (4) D.-C. Fang, *THERMO program*, Beijing Normal University, 2013.
- (5) Y. Li and D.-C. Fang, *Phys. Chem. Chem. Phys.*, 2014, **16**, 15224-15230.
- (6) L. Zhao, S.-J. Li and D.-C. Fang, *ChemPhysChem*, 2015, **16**, 3711-3718.
- (7) L.-L. Han, S.-J. Li and D.-C. Fang, *Phys. Chem. Chem. Phys.*, 2016, **18**, 6182-6190.
- (8) S.-J. Li and D.-C. Fang, *Phys. Chem. Chem. Phys.*, 2016, **18**, 30815-30823.
- (9) Y. Li and D.-C. Fang, *Chem. J. Chin. Univ.*, 2015, **36**, 1954-1960.

## II. Spin state of the reactants and transition states

We optimized transition states (TSs) for both mechanisms in both the quintet and septet states. For the four TSs, the spin densities of FeCl<sub>3</sub> part in **TS1a**(quintet), **TS1a**(septet), **TS1a-O**(quintet) and **TS1a-O**(septet) are 4.734, 4.787, 4.733 and 4.856,

respectively, which are quite close to those in **R2**(quintet) and **R2**(septet) at the calculation level of B3LYP-IDSCRF-D3a/TZP-DKH(-dfg). As the H transfers from C to N or to O, the redistribution of spin densities takes place mainly on fragments of TEMPO and **R1a**. For the N-pathway, the bond lengths of C...H and N...H in **TS1a** are 1.385 and 1.377 (quintet state) and 1.358 and 1.405 Å (septet state), respectively (Figure S2c and S2d), and the O-Fe bond lengths are decreased from **R2** to **TS1a** for both spin states. However, for the O-pathway, the O-Fe bond lengths are increased for both spin state (Figure S2e and S2f), since the oxygen atom is going to accept a hydrogen atom.

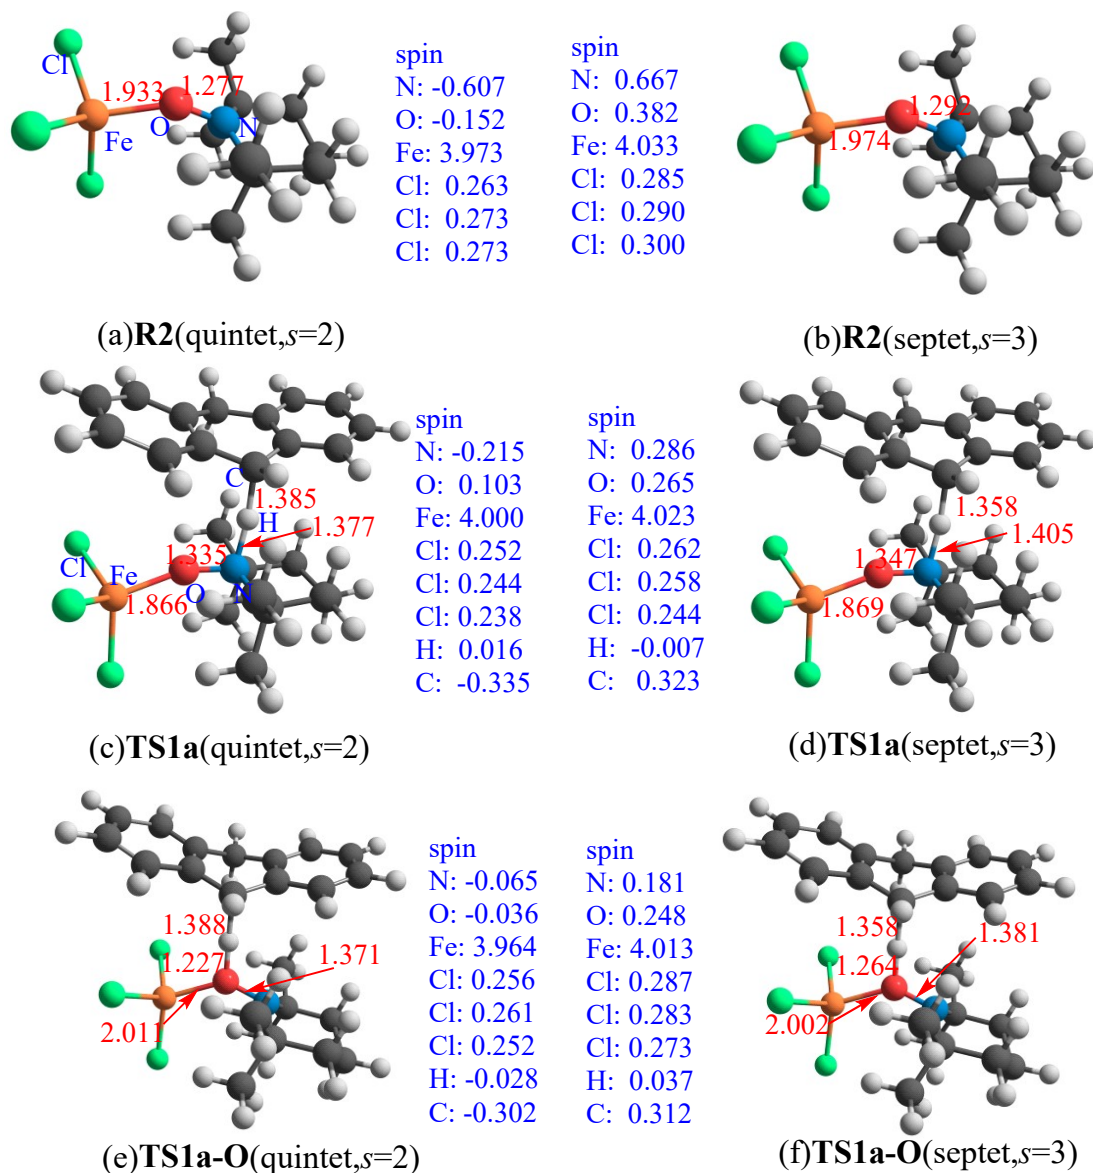

**Figure S2.** Geometries of  $\text{FeCl}_3/\text{TEMPO}(\mathbf{R2})$  and transition states for hydrogen elimination reactions with nitrogen atom in N-O (**TS1a**) and oxygen atom in N-O (**TS1a-O**) on quintet and septet state PESs with the calculation of B3LYP-IDSCRF-D3a/TZP-DKH(-dft). The length of important bonds (red arrows) are given in Å. The atomic spin densities (in blue) for those structures are also given.

### III. The reaction mechanisms and electronic energy profile along the intrinsic reaction coordinates for first step

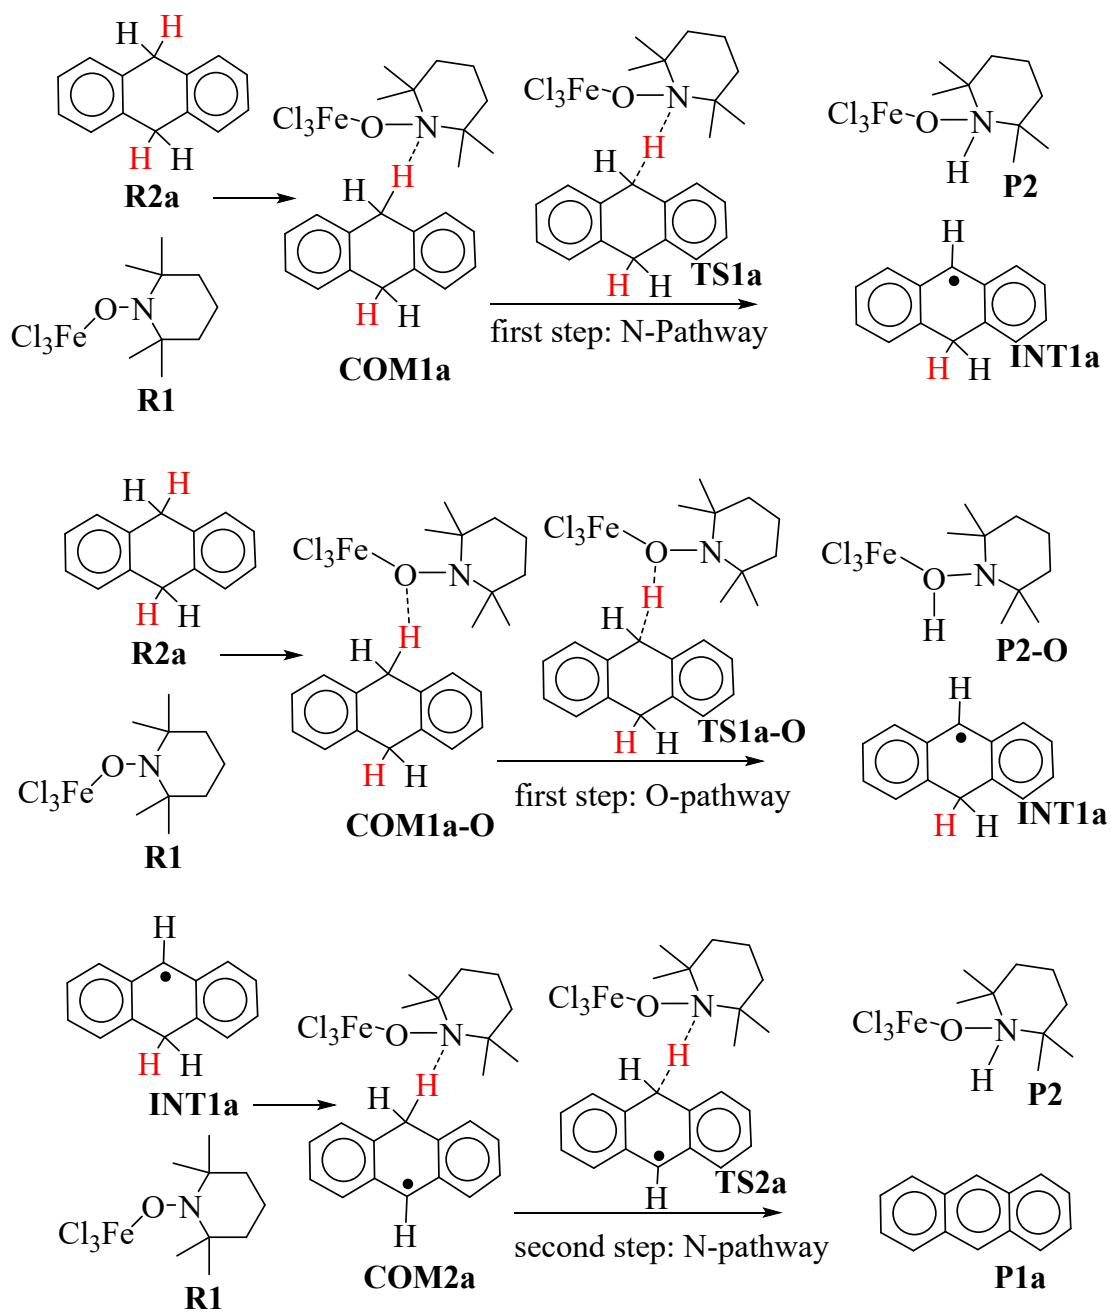

**Figure S3** The possible reaction mechanisms for reaction (1)



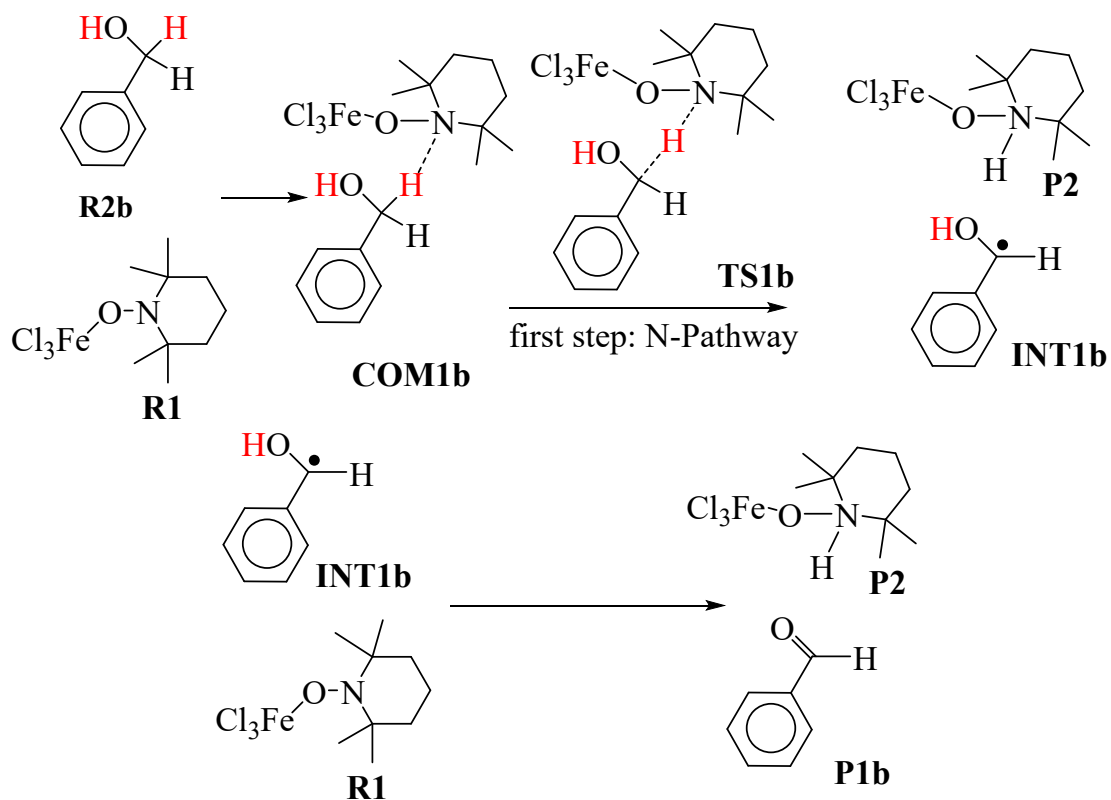

**Figure S4** The possible reaction mechanisms for reaction (2)

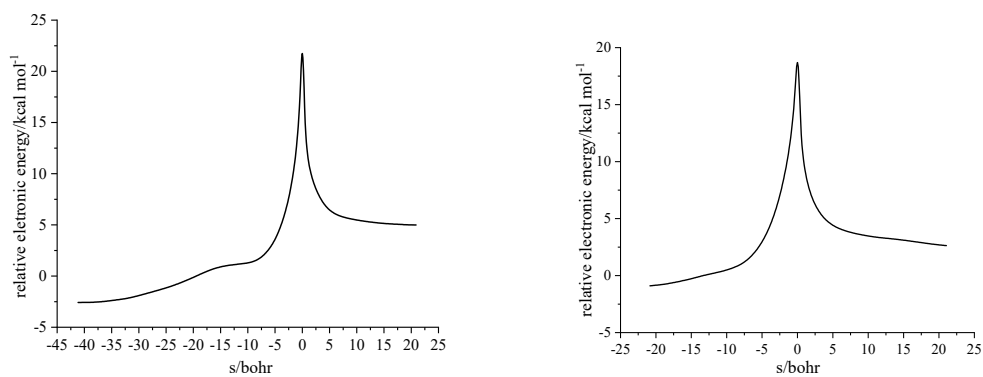

**Figure S5** IRC for the first step of reactions (1) and (2)

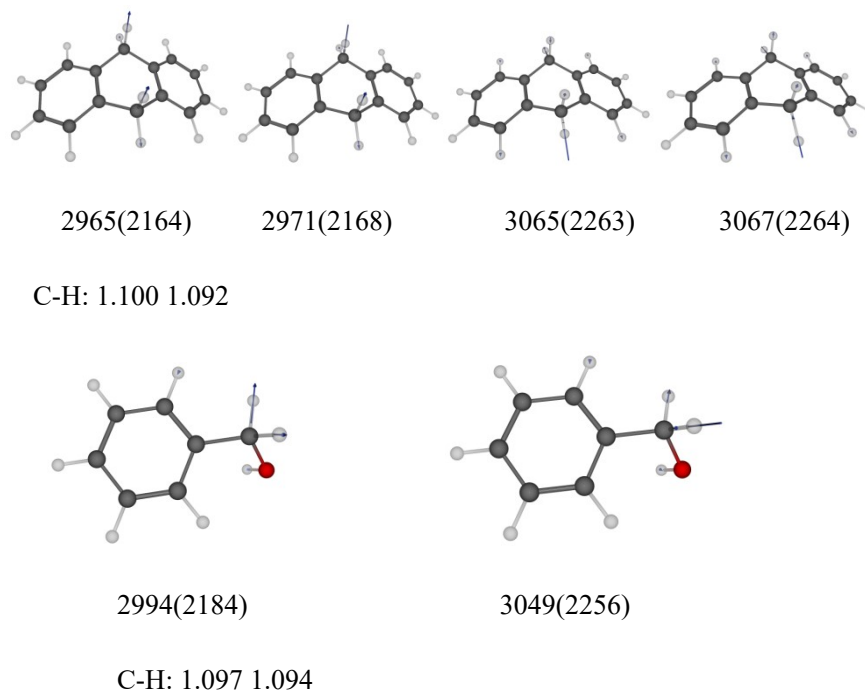

**Figure S6** The frequencies ( $\text{cm}^{-1}$ ) and modes for **R1a** and **R1b** (the data for C-D bonds are given in parentheses), along with the relevant C-H bond length (in Å)

#### IV. Al center vs Fe center

**Table S1** The activation electronic energies, activation enthalpies and activation free-energies(298K,  $\text{kcal mol}^{-1}$ ), imaginary frequencies for transition states( $\text{cm}^{-1}$ ) and the ratio of  $k_{\text{inst}}$  over  $k_{\text{st}}$  for reaction (1) with  $\text{FeCl}_3/\text{TEMPO}$  or  $\text{AlCl}_3/\text{TEMPO}$

|                   | $\Delta E_{\text{e}}^{\ddagger}$ | $\Delta H^{\ddagger}$ | $\Delta G_{\text{g}}^{\ddagger}$ | $\Delta G_{\text{l}}^{\ddagger}$ | $\omega^{\ddagger}$ | $T_{\text{c}}$ | $k_{\text{inst}}/k_{\text{ts}}$ | $\Delta G_{\text{l+ins}}^{\ddagger}$ | $\Delta G_{\text{ex}}^{\ddagger}$ |
|-------------------|----------------------------------|-----------------------|----------------------------------|----------------------------------|---------------------|----------------|---------------------------------|--------------------------------------|-----------------------------------|
|                   |                                  |                       | g                                | l                                |                     |                | t                               | t                                    | p                                 |
| FeCl <sub>3</sub> | 31.1 <sup>a</sup>                | 29.2                  | 43.5                             | 36.7                             | -1772i              | 406            | 160.5                           | 33.9                                 | 24.2 <sup>e</sup>                 |
| /TEMPO            | 21.7 <sup>b</sup>                | 20.0                  | 34.7                             | 27.9                             | -1746i              | 400            | 67.3                            | 25.4                                 |                                   |
|                   | 24.6 <sup>c</sup>                |                       |                                  |                                  |                     |                |                                 | 28.3 <sup>d</sup>                    |                                   |
| AlCl <sub>3</sub> | 30.5 <sup>a</sup>                | 28.6                  | 42.6                             | 35.8                             | -1765i              | 404            | 317.3                           | 32.4                                 | 24.2 <sup>e</sup>                 |
| /TEMPO            | 21.8 <sup>b</sup>                | 20.1                  | 34.2                             | 27.5                             | -1740i              | 398            | 58.6                            | 25.1                                 |                                   |
|                   | 24.0 <sup>c</sup>                |                       |                                  |                                  |                     |                |                                 | 27.3 <sup>d</sup>                    |                                   |

a) B3LYP+IDSCRF/TZP-DKH(-dfg); b) B3LYP+IDSCRF-D3a/TZP-DKH(-dfg);

c) B2GP-PLYP+IDSCRF/TZP-DKH(-dfg);

d) estimated using the free energies computed with the B3LYP+IDSCRF-D3a/TZP-DKH(-dfg) method

e) estimated from experimental reaction time

## V. Raw energy and free energy data

**Table S2** The calculated total electronic energies ( $E_0$ , in Hartree), total enthalpies ( $H$ , in Hartree), total entropies with gas-phase translational entropy ( $S_{\text{g}}$ , in cal mol<sup>-1</sup> K<sup>-1</sup>) and with translational entropy in solution ( $S_{\text{l}}$ , Hartree), and their corresponding Gibbs free energies ( $G_{\text{g}}$  and  $G_{\text{l}}$ , in Hartree) for reaction (1) at 298.15K

|                      | $E_0$                   | $H$        | $S_{\text{g}}$ | $S_{\text{l}}$ | $G_{\text{g}}$ | $G_{\text{l}}$ |
|----------------------|-------------------------|------------|----------------|----------------|----------------|----------------|
| <b>R1a</b> (singlet) | -540.90572 <sup>a</sup> | -540.67828 | 98.2           | 76.0           | -540.72493     | -540.71438     |
|                      | -540.92352 <sup>b</sup> | -540.69585 | 98.2           | 76.0           | -540.74252     | -540.73196     |
|                      | -540.94694 <sup>c</sup> | -540.71942 | 98.0           | 75.8           | -540.76600     | -540.75544     |

|                         |                          |             |       |       |             |             |
|-------------------------|--------------------------|-------------|-------|-------|-------------|-------------|
|                         | -540.33380 <sup>d</sup>  |             |       |       |             |             |
| <b>R2</b> (quintet)     | -3126.12142 <sup>a</sup> | -3125.83447 | 151.7 | 129.9 | -3125.90657 | -3125.89620 |
|                         | -                        | -3125.88099 | 144.1 | 122.3 | -3125.94947 | -3125.93909 |
|                         | 3126.16897 <sup>b</sup>  | -3125.90210 | 146.7 | 124.8 | -3125.97179 | -3125.96140 |
|                         | -3126.18992 <sup>c</sup> |             |       |       |             |             |
|                         | -                        |             |       |       |             |             |
|                         | 3124.86656 <sup>d</sup>  |             |       |       |             |             |
| <b>R2</b> (septet)      | -3126.11537 <sup>a</sup> | -3125.82870 | 152.8 | 131.0 | -3125.90128 | -3125.89093 |
|                         | -                        | -3125.86831 | 149.9 | 128.1 | -3125.93953 | -3125.92917 |
|                         | 3126.15600 <sup>b</sup>  | -3125.89228 | 149.2 | 127.4 | -3125.96318 | -3125.95281 |
|                         | -3126.17990 <sup>c</sup> |             |       |       |             |             |
|                         | -                        |             |       |       |             |             |
|                         | 3124.85951 <sup>d</sup>  |             |       |       |             |             |
| <b>TS1a</b> (quintet)   | -3666.97756 <sup>a</sup> | -3666.46626 | 202.0 | 180.7 | -3666.56223 | -3666.55213 |
|                         | -                        | -3666.55470 | 197.0 | 175.6 | -3666.64829 | -3666.63814 |
|                         | 3667.06760 <sup>b</sup>  | -3666.58957 | 195.7 | 174.3 | -3666.68254 | -3666.67240 |
|                         | -3667.10223 <sup>c</sup> |             |       |       |             |             |
|                         | -                        |             |       |       |             |             |
|                         | 3665.16127 <sup>d</sup>  |             |       |       |             |             |
| <b>TS1a</b> (septet)    | -3666.97417 <sup>a</sup> | -3666.46305 | 202.2 | 181.0 | -3666.55912 | -3666.54902 |
|                         | -                        | -3666.54882 | 198.0 | 176.6 | -3666.64288 | -3666.63273 |
|                         | 3667.06140 <sup>b</sup>  | -3666.58600 | 197.2 | 175.9 | -3666.67971 | -3666.66957 |
|                         | -3667.09844 <sup>c</sup> |             |       |       |             |             |
|                         | -                        |             |       |       |             |             |
|                         | 3665.15925 <sup>d</sup>  |             |       |       |             |             |
| <b>TS1a-O</b> (quintet) | -3666.97398 <sup>a</sup> | -3666.46418 | 202.0 | 180.7 | -3666.56015 | -3666.55005 |
|                         | -                        |             |       |       |             |             |

|                        |                          |             |       |       |             |             |
|------------------------|--------------------------|-------------|-------|-------|-------------|-------------|
|                        | 3667.06007 <sup>b</sup>  | -3666.54880 | 196.9 | 175.5 | -3666.64233 | -3666.63218 |
|                        | -3667.09733 <sup>c</sup> | -3666.58616 | 196.9 | 175.5 | -3666.67970 | -3666.66955 |
|                        | -                        |             |       |       |             |             |
|                        | 3665.14994 <sup>d</sup>  |             |       |       |             |             |
| <b>TS1a-O</b> (septet) | -3666.96835 <sup>a</sup> | -3666.45873 | 202.5 | 181.3 | -3666.55495 | -3666.54485 |
|                        | -                        | -3666.54314 | 197.2 | 175.9 | -3666.63686 | -3666.62671 |
|                        | 3667.05419 <sup>b</sup>  | -3666.58054 | 197.6 | 176.2 | -3666.67443 | -3666.66428 |
|                        | -3667.09146 <sup>c</sup> |             |       |       |             |             |
| <b>INT1a</b> (doublet) | -540.27489 <sup>a</sup>  | -540.06075  | 101.6 | 79.4  | -540.10903  | -540.09847  |
|                        | -540.29124 <sup>b</sup>  | -540.07696  | 101.7 | 79.5  | -540.12529  | -540.11474  |
|                        | -540.31487 <sup>c</sup>  | -540.10067  | 100.6 | 78.4  | -540.14846  | -540.13791  |
|                        | -539.69331 <sup>d</sup>  |             |       |       |             |             |
| <b>P2</b> (sextet)     | -3126.73054 <sup>a</sup> | -3126.42989 | 149.5 | 127.7 | -3126.50092 | -3126.49054 |
|                        | -                        | -3126.47874 | 144.2 | 122.4 | -3126.54727 | -3126.53688 |
|                        | 3126.78041 <sup>b</sup>  | -3126.50310 | 143.7 | 121.8 | -3126.57136 | -3126.56097 |
|                        | -3126.80470 <sup>c</sup> |             |       |       |             |             |
|                        | -                        |             |       |       |             |             |
|                        | 3125.47844 <sup>d</sup>  |             |       |       |             |             |
| <b>P2-O</b> (sextet)   | -3126.70944 <sup>a</sup> | -3126.41084 | 149.6 | 127.7 | -3126.48191 | -3126.47153 |
|                        | -                        | -3126.46035 | 143.8 | 121.9 | -3126.52866 | -3126.51827 |
|                        | 3126.76033 <sup>b</sup>  | -3126.48404 | 145.8 | 123.9 | -3126.55329 | -3126.54290 |
|                        | -3126.78354 <sup>c</sup> |             |       |       |             |             |
|                        | -                        |             |       |       |             |             |
|                        | 3125.46020 <sup>d</sup>  |             |       |       |             |             |
| <b>TS2a</b> (sextet)   | -3666.38511 <sup>a</sup> | -3665.88544 | 200.5 | 179.2 | -3665.98071 | -3665.97061 |
|                        | -                        | -3665.96954 | 194.0 | 172.7 | -3666.06173 | -3666.05159 |

|                      |                          |             |       |       |             |             |
|----------------------|--------------------------|-------------|-------|-------|-------------|-------------|
|                      | 3666.47114 <sup>b</sup>  | -3666.00673 | 193.9 | 172.6 | -3666.09886 | -3666.08872 |
|                      | -3666.50817 <sup>c</sup> |             |       |       |             |             |
|                      | -                        |             |       |       |             |             |
|                      | 3664.57585 <sup>d</sup>  |             |       |       |             |             |
| <b>P1a</b> (singlet) | -539.69929 <sup>a</sup>  | -539.49534  | 93.8  | 71.5  | -539.53990  | -539.52934  |
|                      | -539.71453 <sup>b</sup>  | -539.51043  | 93.7  | 71.5  | -539.55497  | -539.54441  |
|                      | -539.73806 <sup>c</sup>  | -539.53403  | 93.7  | 71.5  | -539.57854  | -539.56798  |
|                      | -539.13242 <sup>d</sup>  |             |       |       |             |             |

a) B3LYP+IDSCRF/TZP-DKH(-dfg); b) B3LYP+IDSCRF-D3/TZP-DKH(-dfg);

c) B3LYP+IDSCRF-D3a/TZP-DKH(-dfg); d) B2GP-PLYP+ IDSCRF/TZP-DKH(-dfg)

**Table S3** Same as **Table S2** for reaction (2).

|                       |                          |             |       |       |             |             |
|-----------------------|--------------------------|-------------|-------|-------|-------------|-------------|
| <b>R1b</b> (singlet)  | -346.89783 <sup>a</sup>  | -346.75696  | 83.6  | 60.7  | -346.79669  | -346.78579  |
|                       | -346.90587 <sup>b</sup>  | -346.76477  | 84.0  | 61.1  | -346.80470  | -346.79380  |
|                       | -346.92308 <sup>c</sup>  | -346.78225  | 83.6  | 60.6  | -346.82196  | -346.81106  |
|                       | -346.53790 <sup>d</sup>  |             |       |       |             |             |
| <b>TS1b</b> (quintet) | -3472.98025 <sup>a</sup> | -3472.55569 | 185.5 | 164.1 | -3472.64383 | -3472.63364 |
|                       | -                        | -3472.62711 | 181.0 | 159.5 | -3472.71311 | -3472.70290 |
|                       | 3473.05302 <sup>b</sup>  | -3472.65741 | 180.8 | 159.3 | -3472.74331 | -3472.73310 |
|                       | -3473.08322 <sup>c</sup> |             |       |       |             |             |
|                       | -                        |             |       |       |             |             |
|                       | 3471.37385 <sup>d</sup>  |             |       |       |             |             |
| <b>TS1b</b> (septet)  | -3472.97681 <sup>a</sup> | -3472.55239 | 186.9 | 165.5 | -3472.64119 | -3472.63100 |
|                       | -                        | -3472.62144 | 182.0 | 160.5 | -3472.70790 | -3472.69769 |
|                       | 3473.04721 <sup>b</sup>  | -3472.65374 | 182.2 | 160.7 | -3472.74031 | -3472.73010 |

|                         |                          |             |       |       |             |             |
|-------------------------|--------------------------|-------------|-------|-------|-------------|-------------|
|                         | -3473.07941 <sup>c</sup> |             |       |       |             |             |
| <b>TS1b-O</b> (quintet) | -3472.96967 <sup>a</sup> | -3472.54670 | 187.0 | 165.5 | -3472.63555 | -3472.62534 |
|                         | -                        | -3472.61642 | 182.1 | 160.5 | -3472.70294 | -3472.69269 |
|                         | 3473.04062 <sup>b</sup>  | -3472.64876 | 182.8 | 161.2 | -3472.73560 | -3472.72536 |
|                         | -3473.07284 <sup>c</sup> |             |       |       |             |             |
|                         | -                        |             |       |       |             |             |
|                         | 3471.35465 <sup>d</sup>  |             |       |       |             |             |
| <b>TS1b-O</b> (septet)  | -3472.96305 <sup>a</sup> | -3472.54026 | 188.2 | 166.7 | -3472.62966 | -3472.61946 |
|                         | -                        | -3472.60972 | 183.7 | 162.2 | -3472.69702 | -3472.68678 |
|                         | 3473.03370 <sup>b</sup>  |             |       |       |             |             |
| <b>INT1b</b> (doublet)  | -346.25916 <sup>a</sup>  | -346.13196  | 82.7  | 59.7  | -346.17127  | -346.16034  |
|                         | -346.26554 <sup>b</sup>  | -346.13805  | 82.8  | 59.8  | -346.17738  | -346.16645  |
|                         | -346.28334 <sup>c</sup>  | -346.15616  | 82.6  | 59.6  | -346.19541  | -346.18448  |
| <b>INT1b'</b> (doublet) | -346.22509 <sup>a</sup>  | -346.09939  | 85.5  | 62.6  | -346.14000  | -346.12911  |
|                         | -346.23280 <sup>b</sup>  | -346.10717  | 85.2  | 62.3  | -346.14766  | -346.13677  |
|                         | -346.24869 <sup>c</sup>  | -346.12309  | 84.8  | 61.9  | -346.16340  | -346.15251  |
| <b>P1b</b> (singlet)    | -345.69176 <sup>a</sup>  | -345.57485  | 79.7  | 56.7  | -345.61272  | -345.60181  |
|                         | -345.69890 <sup>b</sup>  | -345.58196  | 79.6  | 56.7  | -345.61980  | -345.60888  |
|                         | -345.71472 <sup>c</sup>  | -345.59790  | 79.5  | 56.5  | -345.63567  | -345.62475  |

## VI. Geometry data

**Table S4.** The optimized Cartesian Coordinates (in Å) of species studied with B3LYP+IDSCRF/TZP-DKH(-dfg).

| Species             | Cartesian coordinates         | Species            | Cartesian coordinates        |
|---------------------|-------------------------------|--------------------|------------------------------|
| <b>R2 (quintet)</b> | C 4.04824 0.00010 0.15985     | <b>R2 (septet)</b> | C -4.10718 -0.02407 0.18931  |
|                     | C 3.38787 -1.24235 -0.42338   |                    | C -3.47023 1.22348 -0.40942  |
|                     | C 1.87986 -1.34899 -0.13332   |                    | C -1.96169 1.35146 -0.13591  |
|                     | N 1.23706 -0.00003 -0.36667   |                    | N -1.30237 0.01098 -0.33165  |
|                     | C 1.87972 1.34898 -0.13334    |                    | C -1.92444 -1.34353 -0.10954 |
|                     | C 3.38774 1.24244 -0.42347    |                    | C -3.43410 -1.25997 -0.39380 |
|                     | H 5.11106 0.00015 -0.09086    |                    | H -5.17251 -0.04080 -0.04954 |
|                     | H 3.99202 0.00014 1.25133     |                    | H -4.03833 -0.01656 1.28008  |
|                     | H 3.85344 -2.15297 -0.04081   |                    | H -3.94542 2.13015 -0.02977  |
|                     | H 3.53626 -1.24492 -1.50750   |                    | H -3.63009 1.21465 -1.49163  |
|                     | H 3.85325 2.15314 -0.04103    |                    | H -3.88609 -2.17522 -0.00650 |
|                     | H 3.53605 1.24491 -1.50760    |                    | H -3.58818 -1.26718 -1.47692 |
|                     | O -0.00586 -0.00013 -0.66273  |                    | O -0.02237 0.03440 -0.48079  |
|                     | Fe -1.83849 -0.00003 -0.00063 |                    | Fe 1.89595 -0.00119 0.00863  |
|                     | Cl -2.74848 -1.84679 -0.78603 |                    | Cl 2.73852 1.92305 -0.65144  |
|                     | Cl -1.69977 0.00008 2.20016   |                    | Cl 1.91522 -0.22232 2.20543  |
|                     | Cl -2.74838 1.84675 -0.78613  |                    | Cl 2.75148 -1.71874 -1.07101 |
|                     | C 1.61443 1.77031 1.32356     |                    | C -1.64818 -1.77032 1.34402  |
|                     | H 1.96744 2.79468 1.45221     |                    | H -1.98928 -2.79857 1.47314  |
|                     | H 0.55098 1.74374 1.55643     |                    | H -0.58334 -1.73214 1.56897  |
|                     | H 2.13843 1.13989 2.04027     |                    | H -2.17491 -1.14615 2.06474  |
|                     | C 1.23992 2.35642 -1.09359    |                    | C -1.27129 -2.33366 -1.07940 |
|                     | H 1.31489 2.01635 -2.12724    |                    | H -1.36185 -1.98927 -2.11037 |
|                     | H 0.19272 2.54014 -0.86369    |                    | H -0.21850 -2.49232 -0.85719 |
|                     | H 1.78209 3.29887 -1.00422    |                    | H -1.78896 -3.28991 -0.99161 |
|                     | C 1.61451 -1.77029 1.32359    |                    | C -1.68538 1.81334 1.30712   |
|                     | H 2.13859 -1.13991 2.04028    |                    | H -2.18733 1.18794 2.04416   |
|                     | H 0.55107 -1.74361 1.55646    |                    | H -0.61712 1.80944 1.52031   |
|                     | H 1.96741 -2.79470 1.45225    |                    | H -2.05290 2.83414 1.42122   |
|                     | C 1.24015 -2.35647 -1.09359   |                    | C -1.33968 2.33896 -1.12920  |
|                     | H 0.19297 -2.54033 -0.86367   |                    | H -0.29027 2.52851 -0.91490  |



|                     |   |          |          |          |                      |    |          |          |          |
|---------------------|---|----------|----------|----------|----------------------|----|----------|----------|----------|
|                     | H | 1.31506  | -2.01636 | -2.12723 |                      | H  | -1.42712 | 1.97118  | -2.15239 |
|                     | H | 1.78245  | -3.29886 | -1.00426 |                      | H  | -1.88229 | 3.28274  | -1.05804 |
| <b>R1a(singlet)</b> | C | -0.00000 | 1.42572  | 0.69010  | <b>TS1a(quintet)</b> | C  | 1.33161  | -3.81242 | 0.03597  |
|                     | C | 1.25445  | -0.69951 | 0.26292  |                      | C  | 1.54954  | -2.74550 | -1.03439 |
|                     | C | 1.25444  | 0.69956  | 0.26278  |                      | C  | 0.33908  | -1.82576 | -1.26435 |
|                     | C | -1.25444 | 0.69956  | 0.26278  |                      | N  | -0.09156 | -1.27076 | 0.11944  |
|                     | C | -1.25445 | -0.69951 | 0.26291  |                      | C  | -0.33395 | -2.28944 | 1.26520  |
|                     | C | -0.00000 | -1.42562 | 0.69032  |                      | C  | 0.91890  | -3.17383 | 1.36019  |
|                     | H | 0.00000  | -2.44687 | 0.30492  |                      | H  | 2.25625  | -4.37648 | 0.17788  |
|                     | H | -0.00000 | -1.51541 | 1.78636  |                      | H  | 0.58298  | -4.53856 | -0.28817 |
|                     | H | -0.00000 | 2.44694  | 0.30463  |                      | H  | 1.78721  | -3.20944 | -1.99466 |
|                     | C | 3.55016  | 0.69521  | -0.50179 |                      | H  | 2.41528  | -2.13711 | -0.76413 |
|                     | H | 4.43662  | 1.24092  | -0.80219 |                      | H  | 0.71810  | -3.94079 | 2.11199  |
|                     | C | 2.40370  | 1.38527  | -0.12457 |                      | H  | 1.74897  | -2.57666 | 1.74658  |
|                     | H | 2.39941  | 2.46998  | -0.13460 |                      | O  | -1.08115 | -0.37209 | 0.01976  |
|                     | C | 3.55017  | -0.69530 | -0.50163 |                      | Fe | -2.79784 | 0.35205  | -0.26727 |
|                     | H | 4.43664  | -1.24106 | -0.80190 |                      | Cl | -2.55142 | 1.94871  | -1.79115 |
|                     | C | 2.40372  | -1.38529 | -0.12427 |                      | Cl | -4.22056 | -1.19018 | -1.01604 |
|                     | H | 2.39944  | -2.47000 | -0.13407 |                      | Cl | -3.51013 | 1.10688  | 1.70450  |
|                     | C | -3.55015 | 0.69522  | -0.50180 |                      | C  | 1.89348  | 0.44985  | 1.04692  |
|                     | H | -4.43661 | 1.24092  | -0.80220 |                      | H  | 0.98188  | -0.48900 | 0.51958  |
|                     | C | -2.40370 | 1.38527  | -0.12457 |                      | C  | -1.59850 | -3.12665 | 1.02067  |
|                     | H | -2.39941 | 2.46998  | -0.13460 |                      | H  | -1.85186 | -3.62282 | 1.95852  |
|                     | C | -3.55017 | -0.69530 | -0.50164 |                      | H  | -2.44696 | -2.50911 | 0.73458  |
|                     | H | -4.43664 | -1.24105 | -0.80191 |                      | H  | -1.46785 | -3.89952 | 0.27037  |
|                     | C | -2.40372 | -1.38529 | -0.12428 |                      | C  | -0.54285 | -1.51432 | 2.56966  |
|                     | H | -2.39944 | -2.47000 | -0.13408 |                      | H  | 0.32851  | -0.93112 | 2.85645  |
|                     | H | -0.00000 | 1.51558  | 1.78613  |                      | H  | -1.40700 | -0.85480 | 2.51065  |
|                     |   |          |          |          |                      | H  | -0.72302 | -2.23732 | 3.36599  |
|                     |   |          |          |          |                      | C  | -0.80562 | -2.56149 | -1.97480 |
|                     |   |          |          |          |                      | H  | -0.97039 | -3.56770 | -1.60141 |

|  |  |   |          |          |          |
|--|--|---|----------|----------|----------|
|  |  | H | -1.74341 | -2.01376 | -1.91791 |
|  |  | H | -0.53624 | -2.64677 | -3.02857 |
|  |  | C | 0.74087  | -0.62919 | -2.12713 |
|  |  | H | -0.09599 | 0.04681  | -2.29379 |
|  |  | H | 1.56256  | -0.07643 | -1.68238 |
|  |  | H | 1.08006  | -1.00218 | -3.09432 |
|  |  | C | 3.71039  | 1.09779  | -0.53833 |
|  |  | C | 3.23692  | 0.25539  | 0.48434  |
|  |  | C | 1.25442  | 1.74875  | 0.84535  |
|  |  | C | 1.71588  | 2.61992  | -0.16438 |
|  |  | C | 2.84558  | 2.20999  | -1.07214 |
|  |  | H | 3.46865  | 3.07927  | -1.29858 |
|  |  | H | 2.42540  | 1.90456  | -2.04067 |
|  |  | H | 1.80736  | 0.07732  | 2.06492  |
|  |  | C | 5.35793  | -0.92787 | 0.47950  |
|  |  | H | 5.99930  | -1.70070 | 0.88488  |
|  |  | C | 4.08506  | -0.74483 | 0.98859  |
|  |  | H | 3.73766  | -1.37215 | 1.80162  |
|  |  | C | 5.81442  | -0.10386 | -0.54866 |
|  |  | H | 6.81114  | -0.23636 | -0.95128 |
|  |  | C | 4.99515  | 0.90252  | -1.04163 |
|  |  | H | 5.36257  | 1.55917  | -1.82270 |
|  |  | C | -0.37796 | 3.41152  | 1.52422  |
|  |  | H | -1.19469 | 3.71144  | 2.16753  |
|  |  | C | 0.20254  | 2.16878  | 1.68096  |
|  |  | H | -0.15791 | 1.50498  | 2.45553  |
|  |  | C | 0.08266  | 4.26696  | 0.52467  |
|  |  | H | -0.36991 | 5.24201  | 0.39316  |
|  |  | C | 1.12369  | 3.86956  | -0.30518 |
|  |  | H | 1.48563  | 4.54482  | -1.07264 |

|              |          |          |          |          |                 |         |          |          |          |
|--------------|----------|----------|----------|----------|-----------------|---------|----------|----------|----------|
| TS1a(septet) | C        | 1.36443  | -3.83354 | -0.00812 | TS1a-O(quintet) | C       | 3.98042  | 2.47828  | 0.23127  |
|              | C        | 1.58215  | -2.75463 | -1.06609 |                 | C       | 2.89031  | 2.64444  | -0.82009 |
|              | C        | 0.36688  | -1.83934 | -1.29034 |                 | C       | 2.11728  | 1.34472  | -1.12119 |
|              | N        | -0.06951 | -1.30166 | 0.09251  |                 | N       | 1.68659  | 0.77898  | 0.20011  |
|              | C        | -0.31264 | -2.32647 | 1.22573  |                 | C       | 2.60193  | 0.63494  | 1.37773  |
|              | C        | 0.94275  | -3.20834 | 1.31938  |                 | C       | 3.36187  | 1.96916  | 1.52696  |
|              | H        | 2.29071  | -4.39524 | 0.13281  |                 | H       | 4.47042  | 3.43856  | 0.41060  |
|              | H        | 0.62018  | -4.55937 | -0.34306 |                 | H       | 4.76122  | 1.79921  | -0.12096 |
|              | H        | 1.82799  | -3.20635 | -2.03013 |                 | H       | 3.30748  | 3.00770  | -1.76211 |
|              | H        | 2.44245  | -2.14359 | -0.78360 |                 | H       | 2.17650  | 3.39801  | -0.47459 |
|              | H        | 0.74157  | -3.98216 | 2.06404  |                 | H       | 4.12355  | 1.83231  | 2.29803  |
|              | H        | 1.76883  | -2.61076 | 1.71384  |                 | H       | 2.66267  | 2.72340  | 1.90070  |
|              | O        | -1.07993 | -0.41164 | -0.01483 |                 | O       | 0.72469  | -0.20255 | 0.10956  |
|              | Fe       | -2.79699 | 0.34495  | -0.23823 |                 | Fe      | 0.66972  | -2.19542 | -0.37838 |
|              | Cl       | -2.58628 | 2.01149  | -1.68521 |                 | Cl      | -0.92861 | -2.18129 | -1.90105 |
|              | Cl       | -4.21706 | -1.16885 | -1.04480 |                 | Cl      | 2.49937  | -3.12060 | -1.18966 |
|              | Cl       | -3.50339 | 1.01997  | 1.76312  |                 | Cl      | 0.17022  | -3.12414 | 1.56732  |
|              | C        | 1.85926  | 0.47703  | 1.03641  |                 | C       | -1.54365 | 0.74106  | 1.09137  |
|              | H        | 0.99073  | -0.46731 | 0.50947  |                 | H       | -0.35808 | 0.22746  | 0.49139  |
|              | C        | -1.57399 | -3.16757 | 0.97346  |                 | C       | 3.58784  | -0.54202 | 1.25758  |
|              | H        | -1.82738 | -3.67254 | 1.90661  |                 | H       | 4.15136  | -0.62508 | 2.18901  |
|              | H        | -2.42369 | -2.55040 | 0.69024  |                 | H       | 3.07137  | -1.48832 | 1.10617  |
|              | H        | -1.43881 | -3.93370 | 0.21691  |                 | H       | 4.30198  | -0.41652 | 0.44734  |
|              | C        | -0.52502 | -1.56466 | 2.53800  |                 | C       | 1.75693  | 0.42204  | 2.64033  |
|              | H        | 0.34624  | -0.98499 | 2.83250  |                 | H       | 1.04024  | 1.23259  | 2.77342  |
|              | H        | -1.38866 | -0.90419 | 2.48437  |                 | H       | 1.22472  | -0.52792 | 2.62025  |
|              | H        | -0.70724 | -2.29532 | 3.32688  |                 | H       | 2.41864  | 0.41580  | 3.50787  |
|              | C        | -0.77107 | -2.57373 | -2.01466 |                 | C       | 2.98207  | 0.38444  | -1.95861 |
|              | H        | -0.93435 | -3.58365 | -1.65060 |                 | H       | 3.93572  | 0.14969  | -1.49190 |
|              | H        | -1.71020 | -2.02829 | -1.95604 |                 | H       | 2.46747  | -0.55343 | -2.15631 |
|              | H        | -0.49645 | -2.64935 | -3.06788 |                 | H       | 3.19014  | 0.85387  | -2.92213 |
|              | C        | 0.76743  | -0.63384 | -2.14229 |                 | C       | 0.87197  | 1.69899  | -1.94012 |
| H            | -0.07174 | 0.04012  | -2.30493 | H        | 0.30172         | 0.81171 | -2.21316 |          |          |

|                       |   |          |          |          |                       |   |          |          |          |
|-----------------------|---|----------|----------|----------|-----------------------|---|----------|----------|----------|
|                       | H | 1.58534  | -0.08141 | -1.68994 |                       | H | 0.22593  | 2.38446  | -1.39548 |
|                       | H | 1.11116  | -0.99659 | -3.11179 |                       | H | 1.18869  | 2.18824  | -2.86266 |
|                       | C | 3.70968  | 1.12215  | -0.51304 |                       | C | -2.46829 | 2.32516  | -0.57379 |
|                       | C | 3.21697  | 0.28492  | 0.50476  |                       | C | -1.65271 | 2.09184  | 0.55507  |
|                       | C | 1.22238  | 1.77420  | 0.81285  |                       | C | -2.63568 | -0.18667 | 0.82096  |
|                       | C | 1.70506  | 2.64178  | -0.18977 |                       | C | -3.47464 | 0.03239  | -0.29121 |
|                       | C | 2.85223  | 2.22706  | -1.07301 |                       | C | -3.15532 | 1.15986  | -1.23457 |
|                       | H | 3.47696  | 3.09574  | -1.29697 |                       | H | -4.05501 | 1.49275  | -1.75587 |
|                       | H | 2.44994  | 1.91046  | -2.04567 |                       | H | -2.48729 | 0.76262  | -2.01456 |
|                       | H | 1.75792  | 0.12083  | 2.05935  |                       | H | -1.13624 | 0.67853  | 2.09896  |
|                       | C | 5.34126  | -0.89118 | 0.55354  |                       | C | -1.12557 | 4.45826  | 0.65322  |
|                       | H | 5.97614  | -1.65927 | 0.97770  |                       | H | -0.61564 | 5.28567  | 1.13107  |
|                       | C | 4.05692  | -0.70937 | 1.03337  |                       | C | -0.98637 | 3.17543  | 1.15389  |
|                       | H | 3.69380  | -1.33261 | 1.84261  |                       | H | -0.37483 | 3.00086  | 2.03037  |
|                       | C | 5.81747  | -0.07192 | -0.46953 |                       | C | -1.93461 | 4.68237  | -0.45937 |
|                       | H | 6.82324  | -0.20344 | -0.84930 |                       | H | -2.05433 | 5.68510  | -0.85110 |
|                       | C | 5.00579  | 0.92844  | -0.98683 |                       | C | -2.60080 | 3.61897  | -1.06151 |
|                       | H | 5.38804  | 1.58145  | -1.76383 |                       | H | -3.23767 | 3.80127  | -1.91998 |
|                       | C | -0.42605 | 3.43715  | 1.45008  |                       | C | -3.97820 | -2.10245 | 1.44891  |
|                       | H | -1.25722 | 3.73851  | 2.07403  |                       | H | -4.17340 | -2.93101 | 2.11809  |
|                       | C | 0.15079  | 2.19509  | 1.62289  |                       | C | -2.90103 | -1.26672 | 1.67906  |
|                       | H | -0.22745 | 1.53167  | 2.38952  |                       | H | -2.25082 | -1.44044 | 2.52707  |
|                       | C | 0.05680  | 4.29013  | 0.45864  |                       | C | -4.80995 | -1.87471 | 0.35359  |
|                       | H | -0.39298 | 5.26469  | 0.31455  |                       | H | -5.65676 | -2.52497 | 0.17079  |
|                       | C | 1.11595  | 3.89072  | -0.34730 |                       | C | -4.55494 | -0.81182 | -0.50706 |
|                       | H | 1.49445  | 4.56406  | -1.10844 |                       | H | -5.20610 | -0.63887 | -1.35660 |
| <b>TS1a-O(septet)</b> | C | 4.08727  | 2.35271  | 0.16203  | <b>INT1a(doublet)</b> | C | 0.00000  | 1.39331  | 0.07002  |
|                       | C | 2.99434  | 2.55847  | -0.87919 |                       | C | 1.27952  | -0.70665 | 0.02995  |
|                       | C | 2.16106  | 1.29177  | -1.16036 |                       | C | 1.24493  | 0.71082  | 0.03903  |
|                       | N | 1.71706  | 0.76130  | 0.16983  |                       | C | -1.24493 | 0.71082  | 0.03903  |
|                       | C | 2.64331  | 0.57615  | 1.33144  |                       | C | -1.27952 | -0.70665 | 0.02995  |
|                       | C | 3.46038  | 1.87807  | 1.46669  |                       | C | 0.00000  | -1.50372 | 0.11449  |
|                       | H | 4.61969  | 3.29231  | 0.33007  |                       | H | 0.00000  | -2.27544 | -0.66359 |

|    |          |          |          |   |          |          |          |
|----|----------|----------|----------|---|----------|----------|----------|
| H  | 4.83479  | 1.63861  | -0.19335 | H | 0.00000  | -2.06138 | 1.06140  |
| H  | 3.41656  | 2.89574  | -1.82869 | H | 0.00000  | 2.47729  | 0.08137  |
| H  | 2.31842  | 3.34548  | -0.53197 | C | 3.67646  | 0.75283  | -0.05559 |
| H  | 4.22298  | 1.71338  | 2.23147  | H | 4.60338  | 1.31292  | -0.08725 |
| H  | 2.79701  | 2.66310  | 1.84218  | C | 2.46838  | 1.41856  | -0.00086 |
| O  | 0.73390  | -0.21133 | 0.07509  | H | 2.44334  | 2.50253  | 0.00756  |
| Fe | 0.59351  | -2.20275 | -0.33177 | C | 3.70143  | -0.64359 | -0.07388 |
| Cl | -1.06351 | -2.26772 | -1.77913 | H | 4.64572  | -1.17194 | -0.12092 |
| Cl | 2.35583  | -3.20549 | -1.19405 | C | 2.50652  | -1.35564 | -0.03044 |
| Cl | 0.12270  | -3.12675 | 1.61916  | H | 2.53128  | -2.44054 | -0.04177 |
| C  | -1.51528 | 0.76903  | 1.07812  | C | -3.67646 | 0.75283  | -0.05559 |
| H  | -0.37042 | 0.24423  | 0.48191  | H | -4.60338 | 1.31293  | -0.08725 |
| C  | 3.57955  | -0.64005 | 1.20647  | C | -2.46838 | 1.41856  | -0.00085 |
| H  | 4.15248  | -0.74113 | 2.13041  | H | -2.44334 | 2.50253  | 0.00756  |
| H  | 3.02349  | -1.56600 | 1.06976  | C | -3.70143 | -0.64359 | -0.07388 |
| H  | 4.28691  | -0.54999 | 0.38560  | H | -4.64572 | -1.17194 | -0.12092 |
| C  | 1.80661  | 0.40459  | 2.60607  | C | -2.50652 | -1.35564 | -0.03044 |
| H  | 1.12251  | 1.24247  | 2.73975  | H | -2.53128 | -2.44054 | -0.04177 |
| H  | 1.23747  | -0.52388 | 2.59937  |   |          |          |          |
| H  | 2.47659  | 0.37821  | 3.46701  |   |          |          |          |
| C  | 2.97051  | 0.28914  | -2.00299 |   |          |          |          |
| H  | 3.92227  | 0.01974  | -1.55104 |   |          |          |          |
| H  | 2.41335  | -0.62838 | -2.18067 |   |          |          |          |
| H  | 3.18081  | 0.73824  | -2.97577 |   |          |          |          |
| C  | 0.92207  | 1.69849  | -1.96549 |   |          |          |          |
| H  | 0.31245  | 0.83542  | -2.23131 |   |          |          |          |
| H  | 0.31061  | 2.40784  | -1.41112 |   |          |          |          |
| H  | 1.24588  | 2.17571  | -2.89201 |   |          |          |          |
| C  | -2.39618 | 2.42679  | -0.54402 |   |          |          |          |
| C  | -1.58519 | 2.13844  | 0.57500  |   |          |          |          |
| C  | -2.64166 | -0.11313 | 0.78796  |   |          |          |          |
| C  | -3.47207 | 0.15748  | -0.31978 |   |          |          |          |
| C  | -3.12417 | 1.30253  | -1.23260 |   |          |          |          |

|                   |    |          |          |          |                     |    |          |          |          |
|-------------------|----|----------|----------|----------|---------------------|----|----------|----------|----------|
|                   | H  | -4.01846 | 1.67875  | -1.73362 |                     |    |          |          |          |
|                   | H  | -2.47733 | 0.91186  | -2.03262 |                     |    |          |          |          |
|                   | H  | -1.12548 | 0.67755  | 2.09142  |                     |    |          |          |          |
|                   | C  | -0.98282 | 4.48430  | 0.72978  |                     |    |          |          |          |
|                   | H  | -0.44479 | 5.28244  | 1.22632  |                     |    |          |          |          |
|                   | C  | -0.88303 | 3.18550  | 1.19719  |                     |    |          |          |          |
|                   | H  | -0.27360 | 2.96994  | 2.06579  |                     |    |          |          |          |
|                   | C  | -1.78777 | 4.76267  | -0.37363 |                     |    |          |          |          |
|                   | H  | -1.87629 | 5.77813  | -0.74003 |                     |    |          |          |          |
|                   | C  | -2.48952 | 3.73608  | -0.99869 |                     |    |          |          |          |
|                   | H  | -3.12359 | 3.95969  | -1.84950 |                     |    |          |          |          |
|                   | C  | -4.04121 | -2.00440 | 1.36605  |                     |    |          |          |          |
|                   | H  | -4.26268 | -2.84233 | 2.01515  |                     |    |          |          |          |
|                   | C  | -2.94231 | -1.20505 | 1.61958  |                     |    |          |          |          |
|                   | H  | -2.30176 | -1.41609 | 2.46651  |                     |    |          |          |          |
|                   | C  | -4.86302 | -1.72695 | 0.27422  |                     |    |          |          |          |
|                   | H  | -5.72751 | -2.34803 | 0.07363  |                     |    |          |          |          |
|                   | C  | -4.57575 | -0.65000 | -0.55823 |                     |    |          |          |          |
|                   | H  | -5.22045 | -0.43635 | -1.40350 |                     |    |          |          |          |
| <b>P2(sextet)</b> | Fe | 1.71937  | -0.00006 | -0.01415 | <b>P2-O(sextet)</b> | Fe | -1.79737 | -0.00967 | 0.04785  |
|                   | Cl | 2.75476  | 1.83147  | -0.71293 |                     | Cl | -2.77641 | -1.59462 | -1.11070 |
|                   | Cl | 1.56286  | 0.00004  | 2.20418  |                     | Cl | -1.66909 | -0.41195 | 2.19117  |
|                   | O  | 0.01738  | -0.00016 | -0.85563 |                     | O  | 0.03925  | -0.02101 | -0.94568 |
|                   | N  | -1.36283 | -0.00012 | -0.86649 |                     | N  | 1.53896  | -0.00179 | -0.93243 |
|                   | C  | -1.93818 | -1.34602 | -0.28979 |                     | C  | 1.96271  | 1.30832  | -0.31172 |
|                   | C  | -1.88203 | -1.26330 | 1.23788  |                     | C  | 1.79870  | 1.29107  | 1.21875  |
|                   | H  | -2.37813 | -2.15537 | 1.62792  |                     | H  | 2.23681  | 2.20585  | 1.62660  |
|                   | H  | -0.84086 | -1.31966 | 1.55897  |                     | H  | 0.73394  | 1.32839  | 1.46629  |
|                   | C  | -2.51890 | 0.00035  | 1.81916  |                     | C  | 2.42378  | 0.05799  | 1.87463  |
|                   | H  | -2.37598 | 0.00053  | 2.90128  |                     | H  | 2.20409  | 0.06555  | 2.94454  |
|                   | H  | -3.60033 | 0.00033  | 1.65879  |                     | H  | 3.51348  | 0.09476  | 1.79119  |
|                   | C  | -3.36138 | -1.56242 | -0.82223 |                     | C  | 3.42851  | 1.57374  | -0.71452 |
|                   | H  | -4.11745 | -0.96621 | -0.32306 |                     | H  | 4.15242  | 0.99328  | -0.15238 |

|                     |    |          |          |          |                     |    |          |          |          |
|---------------------|----|----------|----------|----------|---------------------|----|----------|----------|----------|
|                     | H  | -3.61666 | -2.60953 | -0.65999 |                     | H  | 3.64402  | 2.62581  | -0.52472 |
|                     | H  | -3.42657 | -1.38192 | -1.89809 |                     | H  | 3.57847  | 1.38384  | -1.77747 |
|                     | C  | -1.06171 | -2.47892 | -0.82530 |                     | C  | 1.14076  | 2.44292  | -0.93687 |
|                     | H  | -1.06465 | -2.50434 | -1.91778 |                     | H  | 1.22140  | 2.42284  | -2.02615 |
|                     | H  | -1.48200 | -3.42079 | -0.47023 |                     | H  | 1.54097  | 3.39620  | -0.58944 |
|                     | H  | -0.03227 | -2.41504 | -0.48894 |                     | H  | 0.08966  | 2.40836  | -0.66612 |
|                     | C  | -1.93812 | 1.34600  | -0.29024 |                     | C  | 2.00484  | -1.28367 | -0.27678 |
|                     | C  | -1.88200 | 1.26379  | 1.23745  |                     | C  | 1.88094  | -1.23304 | 1.25753  |
|                     | H  | -2.37809 | 2.15600  | 1.62719  |                     | H  | 2.39921  | -2.10118 | 1.67364  |
|                     | H  | -0.84084 | 1.32024  | 1.55854  |                     | H  | 0.83099  | -1.34326 | 1.53445  |
|                     | C  | -3.36127 | 1.56231  | -0.82281 |                     | C  | 3.46469  | -1.52936 | -0.71269 |
|                     | H  | -4.11737 | 0.96615  | -0.32363 |                     | H  | 4.18908  | -0.92311 | -0.17855 |
|                     | H  | -3.61657 | 2.60944  | -0.66070 |                     | H  | 3.70723  | -2.57284 | -0.50821 |
|                     | H  | -3.42636 | 1.38169  | -1.89865 |                     | H  | 3.58567  | -1.35628 | -1.78225 |
|                     | C  | -1.06158 | 2.47868  | -0.82608 |                     | C  | 1.18869  | -2.45513 | -0.84039 |
|                     | H  | -1.06448 | 2.50375  | -1.91857 |                     | H  | 1.24201  | -2.47863 | -1.93136 |
|                     | H  | -1.48181 | 3.42070  | -0.47134 |                     | H  | 1.61268  | -3.38726 | -0.46531 |
|                     | H  | -0.03215 | 2.41484  | -0.48967 |                     | H  | 0.14319  | -2.42683 | -0.54468 |
|                     | Cl | 2.75462  | -1.83149 | -0.71351 |                     | Cl | -2.64845 | 1.95763  | -0.40368 |
|                     | H  | -1.60735 | -0.00027 | -1.86355 |                     | H  | -0.14491 | -0.10829 | -1.89473 |
| <b>TS2a(sextet)</b> | C  | 1.37849  | -3.77946 | -0.36289 | <b>P1a(singlet)</b> | C  | 0.00000  | 1.39963  | -0.00026 |
|                     | C  | 1.54722  | -2.58859 | -1.30238 |                     | C  | -1.21929 | -0.72013 | -0.00024 |
|                     | C  | 0.31647  | -1.66623 | -1.37096 |                     | C  | -1.21929 | 0.72013  | -0.00024 |
|                     | N  | -0.04953 | -1.28696 | 0.06485  |                     | C  | 1.21929  | 0.72013  | -0.00024 |
|                     | C  | -0.25225 | -2.41777 | 1.07977  |                     | C  | 1.21929  | -0.72013 | -0.00024 |
|                     | C  | 1.00658  | -3.30077 | 1.03760  |                     | C  | 0.00000  | -1.39963 | -0.00026 |
|                     | H  | 2.31090  | -4.34791 | -0.32081 |                     | H  | 0.00000  | -2.48471 | -0.00038 |
|                     | H  | 0.62232  | -4.46859 | -0.74557 |                     | H  | 0.00000  | 2.48471  | -0.00038 |
|                     | H  | 1.76117  | -2.92663 | -2.31929 |                     | C  | -3.64756 | 0.71109  | 0.00030  |
|                     | H  | 2.41334  | -2.00318 | -0.98244 |                     | H  | -4.59154 | 1.24270  | 0.00058  |
|                     | H  | 0.83730  | -4.14928 | 1.70510  |                     | C  | -2.47169 | 1.40266  | -0.00000 |
|                     | H  | 1.84692  | -2.74121 | 1.45726  |                     | H  | -2.47087 | 2.48691  | 0.00006  |
|                     | O  | -1.09625 | -0.40393 | 0.09446  |                     | C  | -3.64756 | -0.71109 | 0.00030  |

|    |          |          |          |   |          |          |          |
|----|----------|----------|----------|---|----------|----------|----------|
| Fe | -2.79704 | 0.30588  | -0.12190 | H | -4.59154 | -1.24270 | 0.00058  |
| Cl | -2.66019 | 1.90478  | -1.68101 | C | -2.47169 | -1.40266 | -0.00000 |
| Cl | -4.30888 | -1.21101 | -0.76554 | H | -2.47087 | -2.48691 | 0.00006  |
| Cl | -3.37939 | 1.12731  | 1.88609  | C | 3.64756  | 0.71109  | 0.00030  |
| C  | 1.85955  | 0.56021  | 1.12928  | H | 4.59154  | 1.24270  | 0.00058  |
| H  | 1.09194  | -0.32569 | 0.58059  | C | 2.47169  | 1.40266  | -0.00000 |
| C  | -1.51831 | -3.24981 | 0.81574  | H | 2.47087  | 2.48691  | 0.00006  |
| H  | -1.71379 | -3.85800 | 1.70062  | C | 3.64756  | -0.71109 | 0.00030  |
| H  | -2.38877 | -2.61998 | 0.64752  | H | 4.59154  | -1.24270 | 0.00058  |
| H  | -1.42112 | -3.92755 | -0.02702 | C | 2.47169  | -1.40266 | -0.00000 |
| C  | -0.39820 | -1.79138 | 2.47238  | H | 2.47087  | -2.48691 | 0.00006  |
| H  | 0.49462  | -1.24889 | 2.77730  |   |          |          |          |
| H  | -1.25254 | -1.11797 | 2.52007  |   |          |          |          |
| H  | -0.55430 | -2.59030 | 3.19839  |   |          |          |          |
| C  | -0.83663 | -2.33397 | -2.13989 |   |          |          |          |
| H  | -0.98608 | -3.37588 | -1.87172 |   |          |          |          |
| H  | -1.77758 | -1.80688 | -1.99820 |   |          |          |          |
| H  | -0.59720 | -2.30300 | -3.20408 |   |          |          |          |
| C  | 0.68352  | -0.37710 | -2.11472 |   |          |          |          |
| H  | -0.16437 | 0.30238  | -2.18269 |   |          |          |          |
| H  | 1.51283  | 0.14236  | -1.64007 |   |          |          |          |
| H  | 0.99621  | -0.63700 | -3.12725 |   |          |          |          |
| C  | 3.77348  | 1.12973  | -0.35720 |   |          |          |          |
| C  | 3.21435  | 0.30516  | 0.66387  |   |          |          |          |
| C  | 1.25950  | 1.84492  | 0.80563  |   |          |          |          |
| C  | 1.85321  | 2.66324  | -0.21031 |   |          |          |          |
| C  | 3.06379  | 2.26631  | -0.77862 |   |          |          |          |
| H  | 3.50563  | 2.89375  | -1.54675 |   |          |          |          |
| H  | 1.68667  | 0.25090  | 2.15880  |   |          |          |          |
| C  | 5.24997  | -1.00330 | 0.66085  |   |          |          |          |
| H  | 5.83866  | -1.81504 | 1.07103  |   |          |          |          |
| C  | 3.99388  | -0.75082 | 1.16611  |   |          |          |          |
| H  | 3.60436  | -1.36194 | 1.97116  |   |          |          |          |



|                     |   |          |          |          |                      |    |          |          |          |
|---------------------|---|----------|----------|----------|----------------------|----|----------|----------|----------|
|                     | C | 5.78485  | -0.21736 | -0.38074 |                      |    |          |          |          |
|                     | H | 6.76966  | -0.43941 | -0.77154 |                      |    |          |          |          |
|                     | C | 5.06045  | 0.83212  | -0.87877 |                      |    |          |          |          |
|                     | H | 5.46250  | 1.45878  | -1.66629 |                      |    |          |          |          |
|                     | C | -0.45208 | 3.52110  | 1.09442  |                      |    |          |          |          |
|                     | H | -1.35061 | 3.85695  | 1.59617  |                      |    |          |          |          |
|                     | C | 0.10291  | 2.31403  | 1.44768  |                      |    |          |          |          |
|                     | H | -0.36762 | 1.71150  | 2.21293  |                      |    |          |          |          |
|                     | C | 0.11200  | 4.31627  | 0.07136  |                      |    |          |          |          |
|                     | H | -0.35911 | 5.25231  | -0.19956 |                      |    |          |          |          |
|                     | C | 1.23943  | 3.89570  | -0.57277 |                      |    |          |          |          |
|                     | H | 1.68847  | 4.49100  | -1.35897 |                      |    |          |          |          |
| <b>R1b(singlet)</b> | C | -1.44244 | -1.30319 | 0.03937  | <b>TS1b(quintet)</b> | C  | 2.07164  | 3.05126  | -0.19861 |
|                     | C | -0.08007 | -1.09794 | 0.21169  |                      | C  | 1.65666  | 2.40480  | 1.11902  |
|                     | C | -2.29741 | -0.21778 | -0.13844 |                      | C  | 0.23277  | 1.82540  | 1.12462  |
|                     | H | 0.58506  | -1.94309 | 0.34504  |                      | N  | 0.08525  | 0.91097  | -0.12266 |
|                     | H | -3.36041 | -0.37886 | -0.27190 |                      | C  | 0.53606  | 1.46399  | -1.50476 |
|                     | C | 0.45030  | 0.19500  | 0.20669  |                      | C  | 1.94690  | 2.04612  | -1.33934 |
|                     | C | -1.77987 | 1.07146  | -0.14638 |                      | H  | 3.10704  | 3.39032  | -0.12397 |
|                     | H | -2.43751 | 1.92075  | -0.28894 |                      | H  | 1.47410  | 3.94308  | -0.39955 |
|                     | C | -0.41256 | 1.27368  | 0.02178  |                      | H  | 1.71090  | 3.12470  | 1.93894  |
|                     | H | -0.01197 | 2.28172  | 0.00898  |                      | H  | 2.36641  | 1.60953  | 1.35963  |
|                     | H | -1.84106 | -2.31086 | 0.04630  |                      | H  | 2.21787  | 2.50587  | -2.29245 |
|                     | C | 1.93184  | 0.41483  | 0.40203  |                      | H  | 2.65507  | 1.22871  | -1.17891 |
|                     | H | 2.23019  | 0.11933  | 1.41065  |                      | O  | -1.14866 | 0.40081  | -0.22025 |
|                     | H | 2.16365  | 1.48033  | 0.29174  |                      | Fe | -2.67513 | -0.62815 | 0.05291  |
|                     | O | 2.74611  | -0.37459 | -0.46771 |                      | Cl | -3.72173 | -0.70118 | -1.90344 |
|                     | H | 2.48444  | -0.18887 | -1.38063 |                      | Cl | -1.95542 | -2.68861 | 0.68937  |
|                     |   |          |          |          |                      | Cl | -3.89244 | 0.28758  | 1.67656  |
|                     |   |          |          |          |                      | C  | 4.98491  | -1.59482 | -0.93229 |
|                     |   |          |          |          |                      | C  | 3.60294  | -1.70195 | -0.87782 |
|                     |   |          |          |          |                      | C  | 5.69890  | -1.12543 | 0.16752  |
|                     |   |          |          |          |                      | H  | 3.05391  | -2.08686 | -1.72624 |

|                     |                        |          |          |          |          |          |
|---------------------|------------------------|----------|----------|----------|----------|----------|
|                     |                        |          | H        | 6.77767  | -1.04554 | 0.12157  |
|                     |                        |          | C        | 2.91016  | -1.33949 | 0.28557  |
|                     |                        |          | C        | 5.02124  | -0.77269 | 1.33172  |
|                     |                        |          | H        | 5.57188  | -0.42563 | 2.19707  |
|                     |                        |          | C        | 3.63981  | -0.87838 | 1.39098  |
|                     |                        |          | H        | 3.12358  | -0.62358 | 2.30891  |
|                     |                        |          | H        | 5.50974  | -1.88592 | -1.83365 |
|                     |                        |          | C        | 1.44433  | -1.43690 | 0.36728  |
|                     |                        |          | H        | 1.04357  | -1.56006 | 1.37487  |
|                     |                        |          | H        | 0.91290  | -0.17895 | 0.12396  |
|                     |                        |          | O        | 0.87246  | -2.26416 | -0.55336 |
|                     |                        |          | H        | -0.04426 | -2.47682 | -0.27103 |
|                     |                        |          | C        | -0.46170 | 2.50678  | -2.02956 |
|                     |                        |          | H        | -0.25342 | 2.65682  | -3.08971 |
|                     |                        |          | H        | -1.48526 | 2.14862  | -1.93884 |
|                     |                        |          | H        | -0.37949 | 3.47345  | -1.54218 |
|                     |                        |          | C        | 0.55495  | 0.29513  | -2.49230 |
|                     |                        |          | H        | 1.21907  | -0.50498 | -2.17910 |
|                     |                        |          | H        | -0.44205 | -0.11658 | -2.63946 |
|                     |                        |          | H        | 0.91045  | 0.67191  | -3.45217 |
|                     |                        |          | C        | -0.83771 | 2.92583  | 1.12255  |
|                     |                        |          | H        | -0.65528 | 3.70410  | 0.38838  |
|                     |                        |          | H        | -1.82999 | 2.50998  | 0.96077  |
|                     |                        |          | H        | -0.83071 | 3.39580  | 2.10675  |
|                     |                        |          | C        | 0.02775  | 0.96743  | 2.37670  |
|                     |                        |          | H        | -0.95340 | 0.49739  | 2.39523  |
|                     |                        |          | H        | 0.79323  | 0.20247  | 2.48464  |
|                     |                        |          | H        | 0.09786  | 1.61899  | 3.24820  |
| <b>TS1b(septet)</b> | C                      | -2.09206 | 3.06084  | 0.11413  |          |          |
|                     | C                      | -1.57606 | 2.42726  | -1.17385 |          |          |
|                     | C                      | -0.14931 | 1.86054  | -1.07726 |          |          |
|                     | N                      | -0.09475 | 0.93536  | 0.16018  |          |          |
|                     | C                      | -0.63179 | 1.47705  | 1.50742  |          |          |
|                     | <b>TS1b-O(quintet)</b> | C        | -0.70222 | 4.07646  | 0.29032  |          |
|                     |                        | C        | -0.68638 | 3.46045  | -1.10309 |          |
|                     |                        | C        | 0.22036  | 2.21902  | -1.21945 |          |
|                     |                        | N        | -0.13582 | 1.30899  | -0.08483 |          |
|                     |                        | C        | -0.32095 | 1.75577  | 1.33173  |          |

|    |          |          |          |    |          |          |          |
|----|----------|----------|----------|----|----------|----------|----------|
| C  | -2.03384 | 2.05222  | 1.25741  | C  | -1.17800 | 3.03736  | 1.29780  |
| H  | -3.12397 | 3.38784  | -0.03163 | H  | -1.37469 | 4.93767  | 0.30482  |
| H  | -1.52145 | 3.95939  | 0.35957  | H  | 0.28653  | 4.45751  | 0.55865  |
| H  | -1.57808 | 3.15246  | -1.99106 | H  | -0.35352 | 4.18537  | -1.84938 |
| H  | -2.25784 | 1.62632  | -1.47093 | H  | -1.70726 | 3.17157  | -1.37156 |
| H  | -2.36732 | 2.50749  | 2.19291  | H  | -1.19463 | 3.45050  | 2.30885  |
| H  | -2.72572 | 1.23165  | 1.04972  | H  | -2.20632 | 2.75551  | 1.05237  |
| O  | 1.14520  | 0.42043  | 0.35967  | O  | 0.36410  | 0.03796  | -0.20988 |
| Fe | 2.65052  | -0.63512 | -0.03403 | Fe | 2.11159  | -0.98346 | 0.12927  |
| Cl | 3.98785  | 0.45348  | -1.42187 | Cl | 3.94809  | 0.20735  | 0.31632  |
| Cl | 3.61716  | -1.03710 | 1.91047  | Cl | 1.67933  | -2.15969 | 1.94356  |
| Cl | 1.94441  | -2.55610 | -0.98442 | Cl | 2.09932  | -2.21566 | -1.75593 |
| C  | -4.94316 | -1.69659 | 0.89695  | C  | -4.42310 | -1.80589 | 1.06105  |
| C  | -3.56033 | -1.78152 | 0.82615  | C  | -3.16865 | -2.10259 | 0.55640  |
| C  | -5.67284 | -1.17943 | -0.17064 | C  | -5.20922 | -0.82052 | 0.46381  |
| H  | -2.99868 | -2.20360 | 1.64868  | H  | -2.55578 | -2.86472 | 1.01845  |
| H  | -6.75244 | -1.11651 | -0.11163 | H  | -6.18952 | -0.59259 | 0.86399  |
| C  | -2.88291 | -1.34899 | -0.32195 | C  | -2.68093 | -1.41889 | -0.57091 |
| C  | -5.01019 | -0.75662 | -1.32017 | C  | -4.73436 | -0.13399 | -0.65117 |
| H  | -5.57322 | -0.37222 | -2.16184 | H  | -5.34683 | 0.62388  | -1.12396 |
| C  | -3.62821 | -0.84056 | -1.39571 | C  | -3.48177 | -0.42815 | -1.16529 |
| H  | -3.12196 | -0.53199 | -2.30332 | H  | -3.12453 | 0.09248  | -2.04536 |
| H  | -5.45643 | -2.04218 | 1.78608  | H  | -4.79469 | -2.34294 | 1.92517  |
| C  | -1.41579 | -1.41841 | -0.42439 | C  | -1.36355 | -1.70611 | -1.11643 |
| H  | -1.03793 | -1.51445 | -1.44396 | H  | -1.19817 | -1.42851 | -2.16112 |
| H  | -0.90247 | -0.18079 | -0.14699 | H  | -0.51639 | -0.71750 | -0.58855 |
| O  | -0.81868 | -2.27287 | 0.45996  | O  | -0.81493 | -2.89456 | -0.73824 |
| H  | 0.08930  | -2.47105 | 0.14806  | H  | 0.06202  | -2.99489 | -1.15822 |
| C  | 0.32053  | 2.52323  | 2.10717  | C  | 1.01152  | 2.00725  | 2.06165  |
| H  | 0.04678  | 2.65757  | 3.15460  | H  | 0.80399  | 2.23562  | 3.10874  |
| H  | 1.35132  | 2.17612  | 2.07254  | H  | 1.65284  | 1.12672  | 2.04531  |
| H  | 0.25755  | 3.49560  | 1.62802  | H  | 1.57239  | 2.84016  | 1.64295  |
| C  | -0.70656 | 0.30115  | 2.48529  | C  | -1.10205 | 0.67434  | 2.08828  |

|                       |    |          |          |          |                       |   |          |          |          |
|-----------------------|----|----------|----------|----------|-----------------------|---|----------|----------|----------|
|                       | H  | -1.33831 | -0.50367 | 2.12108  |                       | H | -2.03786 | 0.44313  | 1.58032  |
|                       | H  | 0.28263  | -0.10181 | 2.69496  |                       | H | -0.52507 | -0.24192 | 2.20304  |
|                       | H  | -1.13306 | 0.66562  | 3.42088  |                       | H | -1.33862 | 1.04694  | 3.08644  |
|                       | C  | 0.90524  | 2.97415  | -0.98951 |                       | C | 1.70298  | 2.63093  | -1.24161 |
|                       | H  | 0.64533  | 3.75891  | -0.28595 |                       | H | 1.98710  | 3.23163  | -0.38036 |
|                       | H  | 1.88235  | 2.57235  | -0.72990 |                       | H | 2.36090  | 1.76523  | -1.27679 |
|                       | H  | 0.98690  | 3.43310  | -1.97580 |                       | H | 1.88984  | 3.22530  | -2.13828 |
|                       | C  | 0.15401  | 1.02380  | -2.32417 |                       | C | -0.10131 | 1.50314  | -2.53750 |
|                       | H  | 1.15847  | 0.60604  | -2.30435 |                       | H | 0.54468  | 0.64129  | -2.70213 |
|                       | H  | -0.56444 | 0.22058  | -2.47147 |                       | H | -1.14208 | 1.17877  | -2.56191 |
|                       | H  | 0.08996  | 1.67870  | -3.19399 |                       | H | 0.05295  | 2.19793  | -3.36430 |
| <b>TS1b-O(septet)</b> | C  | -0.65041 | 4.12411  | 0.29203  | <b>INT1b(doublet)</b> | C | 1.34308  | -1.34086 | 0.00000  |
|                       | C  | -0.63312 | 3.51702  | -1.10530 |                       | C | -0.01454 | -1.08112 | -0.00031 |
|                       | C  | 0.24086  | 2.25139  | -1.21768 |                       | C | 2.27352  | -0.29932 | 0.00035  |
|                       | N  | -0.17369 | 1.34206  | -0.10364 |                       | H | -0.72720 | -1.89504 | -0.00099 |
|                       | C  | -0.32854 | 1.78779  | 1.31601  |                       | H | 3.33485  | -0.51332 | 0.00094  |
|                       | C  | -1.15789 | 3.08836  | 1.28755  |                       | C | -0.49257 | 0.25667  | 0.00004  |
|                       | H  | -1.30401 | 4.99989  | 0.30585  |                       | C | 1.81963  | 1.02378  | -0.00005 |
|                       | H  | 0.34367  | 4.48169  | 0.57301  |                       | H | 2.53426  | 1.83869  | -0.00027 |
|                       | H  | -0.27169 | 4.23757  | -1.84269 |                       | C | 0.46853  | 1.30329  | -0.00034 |
|                       | H  | -1.65765 | 3.25678  | -1.38838 |                       | H | 0.12733  | 2.33262  | -0.00104 |
|                       | H  | -1.17371 | 3.49376  | 2.30188  |                       | H | 1.68799  | -2.36862 | -0.00018 |
|                       | H  | -2.18981 | 2.83061  | 1.03138  |                       | C | -1.86058 | 0.56435  | 0.00057  |
|                       | O  | 0.37087  | 0.06794  | -0.21811 |                       | H | -2.22330 | 1.58445  | 0.00039  |
|                       | Fe | 2.05882  | -0.97987 | 0.13574  |                       | O | -2.78506 | -0.43518 | -0.00001 |
|                       | Cl | 3.92018  | 0.14521  | 0.40866  |                       | H | -3.67597 | -0.05806 | -0.00026 |
|                       | Cl | 1.62198  | -2.23204 | 1.88722  |                       |   |          |          |          |
|                       | Cl | 2.15949  | -2.21300 | -1.73014 |                       |   |          |          |          |
|                       | C  | -4.40621 | -1.85878 | 1.03914  |                       |   |          |          |          |
|                       | C  | -3.15546 | -2.14513 | 0.51913  |                       |   |          |          |          |
|                       | C  | -5.18832 | -0.84761 | 0.48109  |                       |   |          |          |          |
|                       | H  | -2.54677 | -2.92819 | 0.95058  |                       |   |          |          |          |
|                       | H  | -6.16585 | -0.62805 | 0.89259  |                       |   |          |          |          |

|                        |   |          |          |          |                     |   |          |          |          |
|------------------------|---|----------|----------|----------|---------------------|---|----------|----------|----------|
|                        | C | -2.66557 | -1.42382 | -0.58348 |                     |   |          |          |          |
|                        | C | -4.71158 | -0.12391 | -0.60975 |                     |   |          |          |          |
|                        | H | -5.32012 | 0.65517  | -1.05231 |                     |   |          |          |          |
|                        | C | -3.46213 | -0.40618 | -1.13719 |                     |   |          |          |          |
|                        | H | -3.10155 | 0.14752  | -1.99532 |                     |   |          |          |          |
|                        | H | -4.77829 | -2.42463 | 1.88453  |                     |   |          |          |          |
|                        | C | -1.34687 | -1.69515 | -1.14019 |                     |   |          |          |          |
|                        | H | -1.19883 | -1.39921 | -2.18432 |                     |   |          |          |          |
|                        | H | -0.51326 | -0.73777 | -0.60728 |                     |   |          |          |          |
|                        | O | -0.82130 | -2.91862 | -0.81451 |                     |   |          |          |          |
|                        | H | 0.05644  | -3.01319 | -1.22833 |                     |   |          |          |          |
|                        | C | 1.00455  | 2.00790  | 2.05369  |                     |   |          |          |          |
|                        | H | 0.79773  | 2.23580  | 3.10110  |                     |   |          |          |          |
|                        | H | 1.62636  | 1.11326  | 2.03835  |                     |   |          |          |          |
|                        | H | 1.58808  | 2.82939  | 1.64390  |                     |   |          |          |          |
|                        | C | -1.13552 | 0.72244  | 2.06913  |                     |   |          |          |          |
|                        | H | -2.07409 | 0.51314  | 1.55682  |                     |   |          |          |          |
|                        | H | -0.58009 | -0.20780 | 2.17965  |                     |   |          |          |          |
|                        | H | -1.36583 | 1.09346  | 3.06952  |                     |   |          |          |          |
|                        | C | 1.73418  | 2.62262  | -1.21837 |                     |   |          |          |          |
|                        | H | 2.02575  | 3.21177  | -0.35180 |                     |   |          |          |          |
|                        | H | 2.36798  | 1.73863  | -1.25082 |                     |   |          |          |          |
|                        | H | 1.95159  | 3.21447  | -2.10986 |                     |   |          |          |          |
|                        | C | -0.08238 | 1.55822  | -2.54796 |                     |   |          |          |          |
|                        | H | 0.54160  | 0.67985  | -2.71089 |                     |   |          |          |          |
|                        | H | -1.13083 | 1.26106  | -2.58649 |                     |   |          |          |          |
|                        | H | 0.10149  | 2.25396  | -3.36817 |                     |   |          |          |          |
| <b>INT1b'(doublet)</b> | C | -1.35521 | -1.33137 | 0.00006  | <b>P1b(singlet)</b> | C | -1.33223 | -1.32249 | 0.00002  |
|                        | C | 0.01300  | -1.08071 | 0.00013  |                     | C | 0.03568  | -1.10473 | 0.00010  |
|                        | C | -2.26191 | -0.27605 | -0.00007 |                     | C | -2.21181 | -0.23923 | -0.00009 |
|                        | H | 0.72345  | -1.89714 | 0.00020  |                     | H | 0.73529  | -1.93074 | 0.00011  |
|                        | H | -3.32681 | -0.47327 | -0.00013 |                     | H | -3.28077 | -0.41393 | -0.00022 |
|                        | C | 0.48564  | 0.22846  | 0.00009  |                     | C | 0.53291  | 0.20305  | 0.00010  |

|   |          |          |          |   |          |          |          |
|---|----------|----------|----------|---|----------|----------|----------|
| C | -1.79424 | 1.03460  | -0.00011 | C | -1.72352 | 1.06327  | -0.00006 |
| H | -2.49400 | 1.86140  | -0.00022 | H | -2.40939 | 1.90096  | -0.00019 |
| C | -0.42714 | 1.28400  | -0.00003 | C | -0.35204 | 1.28324  | 0.00007  |
| H | -0.06711 | 2.30771  | -0.00005 | H | 0.03997  | 2.29431  | 0.00021  |
| H | -1.71434 | -2.35341 | 0.00009  | H | -1.72081 | -2.33321 | 0.00009  |
| C | 1.96885  | 0.52760  | 0.00025  | C | 1.98550  | 0.46262  | 0.00003  |
| H | 2.23475  | 1.18033  | 0.85883  | H | 2.26087  | 1.53673  | 0.00006  |
| H | 2.23477  | 1.18153  | -0.85742 | O | 2.84600  | -0.39105 | -0.00014 |
| O | 2.82942  | -0.51579 | -0.00040 |   |          |          |          |

**Table S2.** The optimized Cartesian Coordinates(in Å) of some selected species studied with B3LYP+IDSCRF-D3, B3LYP+IDSCRF-D3a and B2GP-PLYP-IDSCRF with basis set of TZP-DKH(-dfg) .

| Species                       | Cartesian coordinates |          |          | Species  | Cartesian coordinates         |          |          |          |          |
|-------------------------------|-----------------------|----------|----------|----------|-------------------------------|----------|----------|----------|----------|
| <b>R2</b> (quintet)           | C                     | 3.98067  | 0.00031  | 0.28409  | <b>R2</b> (septet)            | C        | -3.98538 | 0.25815  | 0.38839  |
| B3LYP+IDSCRF-D3/TZP-DKH(-dfg) | C                     | 3.36292  | -1.24323 | -0.34424 | B3LYP+IDSCRF-D3/TZP-DKH(-dfg) | C        | -3.26637 | 1.41990  | -0.28497 |
|                               | C                     | 1.84128  | -1.34589 | -0.15237 | C                             | -1.73318 | 1.35133  | -0.18399 |          |
|                               | N                     | 1.22251  | -0.00004 | -0.42182 | N                             | -1.27798 | -0.05802 | -0.42565 |          |
|                               | C                     | 1.84095  | 1.34594  | -0.15236 | C                             | -2.04766 | -1.32034 | -0.15981 |          |
|                               | C                     | 3.36259  | 1.24364  | -0.34433 | C                             | -3.55340 | -1.04255 | -0.27722 |          |
|                               | H                     | 5.05850  | 0.00046  | 0.11105  | H                             | -5.06483 | 0.38483  | 0.28519  |          |
|                               | H                     | 3.84291  | 0.00034  | 1.36781  | H                             | -3.77808 | 0.23707  | 1.46110  |          |
|                               | H                     | 3.80161  | -2.15417 | 0.06695  | H                             | -3.57394 | 2.37758  | 0.13917  |          |
|                               | H                     | 3.58040  | -1.24267 | -1.41642 | H                             | -3.54682 | 1.43929  | -1.34227 |          |
|                               | H                     | 3.80109  | 2.15472  | 0.06676  | H                             | -4.07489 | -1.90096 | 0.15058  |          |
|                               | H                     | 3.58002  | 1.24303  | -1.41653 | H                             | -3.82475 | -1.00373 | -1.33653 |          |
|                               | O                     | -0.01195 | -0.00021 | -0.74578 | O                             | -0.01942 | -0.23720 | -0.65569 |          |
|                               | Fe                    | -1.79792 | -0.00002 | -0.00628 | Fe                            | 1.82905  | -0.04244 | 0.01053  |          |
|                               | Cl                    | -2.68643 | -1.87542 | -0.75807 | Cl                            | 2.55097  | 1.99774  | -0.36924 |          |
| Cl                            | -1.64287              | -0.00005 | 2.19566  | Cl       | 1.72551                       | -0.47944 | 2.16502  |          |          |

|                               |                              |                               |                               |
|-------------------------------|------------------------------|-------------------------------|-------------------------------|
|                               | Cl -2.68640 1.87536 -0.75809 |                               | Cl 2.91546 -1.55687 -1.13883  |
|                               | C 1.47086 1.75995 1.28162    |                               | C -1.66897 -1.80217 1.25166   |
|                               | H 1.82153 2.77996 1.44391    |                               | H -2.12836 -2.77720 1.42046   |
|                               | H 0.39216 1.73868 1.42571    |                               | H -0.58951 -1.90245 1.34775   |
|                               | H 1.92978 1.11682 2.02988    |                               | H -2.01952 -1.12053 2.02521   |
|                               | C 1.24533 2.34313 -1.15023   |                               | C -1.61844 -2.36091 -1.19910  |
|                               | H 1.39443 2.00433 -2.17615   |                               | H -1.77697 -1.98761 -2.21172  |
|                               | H 0.18056 2.49408 -0.98403   |                               | H -0.57025 -2.62986 -1.08696  |
|                               | H 1.75779 3.29748 -1.02381   |                               | H -2.22734 -3.25542 -1.06143  |
|                               | C 1.47117 -1.76007 1.28155   |                               | C -1.23891 1.77321 1.21041    |
|                               | H 1.92989 -1.11691 2.02989   |                               | H -1.71056 1.19538 2.00381    |
|                               | H 0.39246 -1.73903 1.42554   |                               | H -0.15981 1.65689 1.29591    |
|                               | H 1.82203 -2.78003 1.44382   |                               | H -1.48010 2.82636 1.36016    |
|                               | C 1.24598 -2.34320 -1.15031  |                               | C -1.10490 2.24108 -1.26101   |
|                               | H 0.18124 -2.49442 -0.98420  |                               | H -0.02289 2.28407 -1.17045   |
|                               | H 1.39508 -2.00432 -2.17620  |                               | H -1.36361 1.88209 -2.25810   |
|                               | H 1.75869 -3.29742 -1.02389  |                               | H -1.50155 3.25071 -1.14491   |
| <b>R1a</b> (singlet)          | C -0.00000 1.41879 0.71773   | <b>TS1a</b> (quintet)         | C 1.48186 -3.70047 -0.14564   |
| B3LYP+IDSCRF-D3/TZP-DKH(-dfg) | C 1.25166 -0.69944 0.27349   | B3LYP+IDSCRF-D3/TZP-DKH(-dfg) | C 1.67011 -2.55698 -1.14108   |
|                               | C 1.25166 0.69950 0.27335    |                               | C 0.42648 -1.67360 -1.31738   |
|                               | C -1.25166 0.69950 0.27335   |                               | N -0.02557 -1.24400 0.09457   |
|                               | C -1.25166 -0.69944 0.27348  |                               | C -0.24600 -2.33051 1.16658   |
|                               | C 0.00000 -1.41868 0.71794   |                               | C 1.03912 -3.16733 1.21615    |
|                               | H 0.00000 -2.44940 0.35956   |                               | H 2.42385 -4.24158 -0.03420   |
|                               | H -0.00000 -1.47532 1.81565  |                               | H 0.75825 -4.42531 -0.52394   |
|                               | H -0.00000 2.44948 0.35928   |                               | H 1.93354 -2.94437 -2.12763   |
|                               | C 3.53556 0.69533 -0.52243   |                               | H 2.50649 -1.93397 -0.81725   |
|                               | H 4.41776 1.24051 -0.83502   |                               | H 0.86917 -3.98722 1.91713    |
|                               | C 2.39423 1.38614 -0.12916   |                               | H 1.84034 -2.55667 1.63962    |
|                               | H 2.38933 2.47050 -0.13865   |                               | O -1.02499 -0.35938 0.05758   |
|                               | C 3.53557 -0.69541 -0.52227  |                               | Fe -2.75306 0.28427 -0.22897  |
|                               | H 4.41779 -1.24065 -0.83472  |                               | Cl -2.49529 1.94390 -1.68734  |
|                               | C 2.39425 -1.38616 -0.12886  |                               | Cl -4.11465 -1.26939 -1.06331 |

|   |          |          |          |    |          |          |          |
|---|----------|----------|----------|----|----------|----------|----------|
| H | 2.38937  | -2.47052 | -0.13811 | Cl | -3.47251 | 0.89861  | 1.79354  |
| C | -3.53555 | 0.69533  | -0.52245 | C  | 1.85104  | 0.47632  | 1.11792  |
| H | -4.41776 | 1.24051  | -0.83504 | H  | 1.01992  | -0.47612 | 0.55409  |
| C | -2.39423 | 1.38614  | -0.12916 | C  | -1.48247 | -3.18290 | 0.85416  |
| H | -2.38933 | 2.47050  | -0.13864 | H  | -1.72429 | -3.75830 | 1.74835  |
| C | -3.53557 | -0.69542 | -0.52228 | H  | -2.34269 | -2.56206 | 0.61437  |
| H | -4.41779 | -1.24065 | -0.83474 | H  | -1.32924 | -3.88749 | 0.04442  |
| C | -2.39425 | -1.38616 | -0.12887 | C  | -0.49850 | -1.63288 | 2.50615  |
| H | -2.38937 | -2.47052 | -0.13813 | H  | 0.34802  | -1.03617 | 2.83431  |
| H | -0.00000 | 1.47549  | 1.81543  | H  | -1.38231 | -0.99867 | 2.45747  |
|   |          |          |          | H  | -0.66744 | -2.39964 | 3.26247  |
|   |          |          |          | C  | -0.69279 | -2.39145 | -2.07951 |
|   |          |          |          | H  | -0.82834 | -3.42434 | -1.77581 |
|   |          |          |          | H  | -1.64258 | -1.87230 | -1.97741 |
|   |          |          |          | H  | -0.42472 | -2.39402 | -3.13657 |
|   |          |          |          | C  | 0.77544  | -0.39505 | -2.07879 |
|   |          |          |          | H  | -0.08975 | 0.25912  | -2.17347 |
|   |          |          |          | H  | 1.57865  | 0.14681  | -1.59299 |
|   |          |          |          | H  | 1.11821  | -0.67036 | -3.07646 |
|   |          |          |          | C  | 3.66955  | 1.22197  | -0.41662 |
|   |          |          |          | C  | 3.20663  | 0.34142  | 0.57621  |
|   |          |          |          | C  | 1.12164  | 1.71503  | 0.87583  |
|   |          |          |          | C  | 1.56645  | 2.62513  | -0.10484 |
|   |          |          |          | C  | 2.80132  | 2.34544  | -0.92025 |
|   |          |          |          | H  | 3.40196  | 3.25709  | -0.99294 |
|   |          |          |          | H  | 2.49834  | 2.12643  | -1.95264 |
|   |          |          |          | H  | 1.75319  | 0.09378  | 2.13034  |
|   |          |          |          | C  | 5.33589  | -0.82341 | 0.53072  |
|   |          |          |          | H  | 5.98342  | -1.60543 | 0.90666  |
|   |          |          |          | C  | 4.06324  | -0.66721 | 1.04790  |
|   |          |          |          | H  | 3.71875  | -1.32715 | 1.83520  |
|   |          |          |          | C  | 5.78310  | 0.03789  | -0.47182 |
|   |          |          |          | H  | 6.77834  | -0.07549 | -0.88289 |



|                               |    |          |                         |          |         |          |
|-------------------------------|----|----------|-------------------------|----------|---------|----------|
|                               |    |          | C                       | 4.95512  | 1.05346 | -0.92878 |
|                               |    |          | H                       | 5.31317  | 1.73675 | -1.69071 |
|                               |    |          | C                       | -0.74048 | 3.18126 | 1.39131  |
|                               |    |          | H                       | -1.64724 | 3.37733 | 1.94642  |
|                               |    |          | C                       | -0.03899 | 2.01437 | 1.61419  |
|                               |    |          | H                       | -0.39880 | 1.30739 | 2.34848  |
|                               |    |          | C                       | -0.29345 | 4.07974 | 0.42383  |
|                               |    |          | H                       | -0.84444 | 4.99229 | 0.23588  |
|                               |    |          | C                       | 0.85255  | 3.80020 | -0.30983 |
|                               |    |          | H                       | 1.19718  | 4.50589 | -1.05722 |
| <b>TS1a</b> (septet)          | C  | 1.52940  | -3.71361                | -0.17356 |         |          |
| B3LYP+IDSCRF-D3/TZP-DKH(-dfg) | C  | 1.70819  | -2.56203                | -1.16152 |         |          |
|                               | C  | 0.45527  | -1.68996                | -1.33262 |         |          |
|                               | N  | 0.00337  | -1.27502                | 0.07590  |         |          |
|                               | C  | -0.21530 | -2.36408                | 1.13603  |         |          |
|                               | C  | 1.07530  | -3.19292                | 1.18943  |         |          |
|                               | H  | 2.47656  | -4.24587                | -0.06187 |         |          |
|                               | H  | 0.81478  | -4.44380                | -0.55910 |         |          |
|                               | H  | 1.97926  | -2.94032                | -2.14979 |         |          |
|                               | H  | 2.53641  | -1.93154                | -0.83008 |         |          |
|                               | H  | 0.90764  | -4.01879                | 1.88438  |         |          |
|                               | H  | 1.86961  | -2.57854                | 1.62098  |         |          |
|                               | O  | -1.01909 | -0.40011                | 0.03492  |         |          |
|                               | Fe | -2.74734 | 0.27004                 | -0.20478 |         |          |
|                               | Cl | -2.55073 | 1.96105                 | -1.61948 |         |          |
|                               | Cl | -4.10597 | -1.27286                | -1.04918 |         |          |
|                               | Cl | -3.46573 | 0.86051                 | 1.81753  |         |          |
|                               | C  | 1.81958  | 0.50832                 | 1.11098  |         |          |
|                               | H  | 1.03429  | -0.44861                | 0.55426  |         |          |
|                               | C  | -1.44472 | -3.22482                | 0.81357  |         |          |
|                               | H  | -1.70939 | -3.78342                | 1.71202  |         |          |
|                               | H  | -2.29749 | -2.60824                | 0.53835  |         |          |
|                               | H  | -1.27072 | -3.94533                | 0.02157  |         |          |
|                               |    |          | <b>TS1a-O</b> (quintet) |          |         |          |
|                               | C  | 4.38234  | 1.58924                 | 0.17464  |         |          |
| B3LYP+IDSCRF-D3/TZP-DKH(-dfg) | C  | 3.32733  | 2.03242                 | -0.83215 |         |          |
|                               | C  | 2.26115  | 0.95874                 | -1.11499 |         |          |
|                               | N  | 1.76234  | 0.48164                 | 0.21210  |         |          |
|                               | C  | 2.65060  | 0.11348                 | 1.35501  |         |          |
|                               | C  | 3.70198  | 1.23023                 | 1.49054  |         |          |
|                               | H  | 5.10080  | 2.39595                 | 0.33843  |         |          |
|                               | H  | 4.95446  | 0.74139                 | -0.21021 |         |          |
|                               | H  | 3.78314  | 2.30871                 | -1.78543 |         |          |
|                               | H  | 2.82349  | 2.92358                 | -0.44601 |         |          |
|                               | H  | 4.43130  | 0.91291                 | 2.23903  |         |          |
|                               | H  | 3.20762  | 2.12404                 | 1.88360  |         |          |
|                               | O  | 0.64830  | -0.31184                | 0.12084  |         |          |
|                               | Fe | 0.19113  | -2.20069                | -0.39553 |         |          |
|                               | Cl | -1.39912 | -1.77122                | -1.86407 |         |          |
|                               | Cl | 1.76692  | -3.47678                | -1.25372 |         |          |
|                               | Cl | -0.44234 | -2.99944                | 1.56758  |         |          |
|                               | C  | -1.35975 | 0.97463                 | 1.18211  |         |          |
|                               | H  | -0.32751 | 0.28637                 | 0.56185  |         |          |
|                               | C  | 3.32097  | -1.26054                | 1.18873  |         |          |
|                               | H  | 3.89376  | -1.48630                | 2.09008  |         |          |
|                               | H  | 2.58225  | -2.05062                | 1.06779  |         |          |
|                               | H  | 3.99904  | -1.30166                | 0.34080  |         |          |

|   |          |          |          |   |          |          |          |
|---|----------|----------|----------|---|----------|----------|----------|
| C | -0.47801 | -1.67635 | 2.47936  | C | 1.79802  | 0.07655  | 2.62908  |
| H | 0.35967  | -1.06741 | 2.80856  | H | 1.29452  | 1.02982  | 2.78771  |
| H | -1.37070 | -1.05426 | 2.43444  | H | 1.05535  | -0.71938 | 2.58748  |
| H | -0.63449 | -2.44828 | 3.23333  | H | 2.44688  | -0.11003 | 3.48603  |
| C | -0.65825 | -2.41216 | -2.10134 | C | 2.82855  | -0.17057 | -1.99001 |
| H | -0.78292 | -3.44926 | -1.80672 | H | 3.68436  | -0.66972 | -1.54424 |
| H | -1.61259 | -1.90271 | -1.98932 | H | 2.07220  | -0.92493 | -2.19531 |
| H | -0.39436 | -2.40258 | -3.15955 | H | 3.14337  | 0.24878  | -2.94730 |
| C | 0.79568  | -0.40525 | -2.08927 | C | 1.09387  | 1.60248  | -1.86749 |
| H | -0.07496 | 0.24190  | -2.18396 | H | 0.30314  | 0.87793  | -2.06117 |
| H | 1.59210  | 0.14238  | -1.59837 | H | 0.68372  | 2.43899  | -1.30799 |
| H | 1.14485  | -0.67317 | -3.08696 | H | 1.45373  | 1.97414  | -2.82814 |
| C | 3.65914  | 1.25323  | -0.40124 | C | -1.89324 | 2.69003  | -0.51566 |
| C | 3.18585  | 0.37829  | 0.59145  | C | -1.17200 | 2.30892  | 0.63613  |
| C | 1.09063  | 1.74423  | 0.84988  | C | -2.58797 | 0.26017  | 0.86860  |
| C | 1.54550  | 2.64891  | -0.13044 | C | -3.33493 | 0.63149  | -0.26699 |
| C | 2.79132  | 2.36636  | -0.92831 | C | -2.78560 | 1.68342  | -1.18833 |
| H | 3.38819  | 3.28030  | -1.00569 | H | -3.58977 | 2.18366  | -1.73178 |
| H | 2.50122  | 2.13286  | -1.96151 | H | -2.18668 | 1.15940  | -1.94967 |
| H | 1.71440  | 0.14397  | 2.13038  | H | -0.98145 | 0.82194  | 2.19072  |
| C | 5.32116  | -0.77551 | 0.58834  | C | -0.10178 | 4.48354  | 0.68190  |
| H | 5.96699  | -1.55132 | 0.98058  | H | 0.58881  | 5.17931  | 1.14207  |
| C | 4.03961  | -0.62230 | 1.08387  | C | -0.27318 | 3.21914  | 1.21797  |
| H | 3.68595  | -1.27724 | 1.87164  | H | 0.27696  | 2.92708  | 2.10311  |
| C | 5.77963  | 0.08083  | -0.41336 | C | -0.82894 | 4.86081  | -0.44621 |
| H | 6.78222  | -0.03016 | -0.80769 | H | -0.70513 | 5.85184  | -0.86527 |
| C | 4.95361  | 1.08834  | -0.89139 | C | -1.71878 | 3.96622  | -1.03401 |
| H | 5.32029  | 1.76787  | -1.65304 | H | -2.28049 | 4.26520  | -1.91187 |
| C | -0.78272 | 3.20679  | 1.33275  | C | -4.23430 | -1.43252 | 1.39612  |
| H | -1.69803 | 3.40301  | 1.87425  | H | -4.58048 | -2.23787 | 2.03156  |
| C | -0.08083 | 2.04391  | 1.57139  | C | -3.05014 | -0.78186 | 1.68763  |
| H | -0.44911 | 1.33733  | 2.30257  | H | -2.46287 | -1.07847 | 2.54662  |
| C | -0.32661 | 4.09985  | 0.36393  | C | -4.97770 | -1.05077 | 0.27977  |

|                               |    |          |          |          |                               |   |          |          |          |
|-------------------------------|----|----------|----------|----------|-------------------------------|---|----------|----------|----------|
|                               | H  | -0.87917 | 5.00878  | 0.16170  |                               | H | -5.90705 | -1.55689 | 0.04861  |
|                               | C  | 0.82978  | 3.81952  | -0.35316 |                               | C | -4.52620 | -0.02373 | -0.54263 |
|                               | H  | 1.18156  | 4.52182  | -1.10093 |                               | H | -5.10422 | 0.26359  | -1.41366 |
| <b>TS1a-O</b> (septet)        | C  | 4.47298  | 1.40396  | 0.11211  | <b>INT1a</b> (doublet)        | C | 0.00000  | 1.39448  | 0.06985  |
| B3LYP+IDSCRF-D3/TZP-DKH(-dfg) | C  | 3.43263  | 1.90400  | -0.88322 | B3LYP+IDSCRF-D3/TZP-DKH(-dfg) | C | 1.27860  | -0.70561 | 0.02935  |
|                               | C  | 2.30480  | 0.89117  | -1.15244 |                               | C | 1.24452  | 0.71168  | 0.03880  |
|                               | N  | 1.79582  | 0.44205  | 0.17900  |                               | C | -1.24452 | 0.71168  | 0.03880  |
|                               | C  | 2.67989  | 0.01323  | 1.30216  |                               | C | -1.27860 | -0.70561 | 0.02935  |
|                               | C  | 3.78665  | 1.07641  | 1.43307  |                               | C | 0.00000  | -1.50237 | 0.11367  |
|                               | H  | 5.23403  | 2.17182  | 0.27073  |                               | H | 0.00000  | -2.27396 | -0.66444 |
|                               | H  | 4.99649  | 0.52849  | -0.28018 |                               | H | 0.00000  | -2.05880 | 1.06095  |
|                               | H  | 3.89199  | 2.15460  | -1.84201 |                               | H | 0.00000  | 2.47853  | 0.08160  |
|                               | H  | 2.98380  | 2.82184  | -0.49177 |                               | C | 3.67594  | 0.75170  | -0.05522 |
|                               | H  | 4.50540  | 0.72149  | 2.17496  |                               | H | 4.60332  | 1.31096  | -0.08657 |
|                               | H  | 3.33996  | 1.99243  | 1.83198  |                               | C | 2.46836  | 1.41869  | -0.00077 |
|                               | O  | 0.65035  | -0.32098 | 0.07379  |                               | H | 2.44448  | 2.50269  | 0.00773  |
|                               | Fe | 0.09427  | -2.19612 | -0.35094 |                               | C | 3.69989  | -0.64502 | -0.07338 |
|                               | Cl | -1.59004 | -1.83056 | -1.71562 |                               | H | 4.64375  | -1.17410 | -0.11999 |
|                               | Cl | 1.57222  | -3.53187 | -1.28472 |                               | C | 2.50426  | -1.35607 | -0.03034 |
|                               | Cl | -0.48804 | -2.99971 | 1.62173  |                               | H | 2.52656  | -2.44097 | -0.04137 |
|                               | C  | -1.31514 | 1.01543  | 1.17174  |                               | C | -3.67594 | 0.75170  | -0.05521 |
|                               | H  | -0.33274 | 0.31386  | 0.55088  |                               | H | -4.60332 | 1.31096  | -0.08657 |
|                               | C  | 3.28438  | -1.38924 | 1.12033  |                               | C | -2.46836 | 1.41869  | -0.00077 |
|                               | H  | 3.87051  | -1.64094 | 2.00619  |                               | H | -2.44448 | 2.50269  | 0.00773  |
|                               | H  | 2.50901  | -2.14671 | 1.02231  |                               | C | -3.69989 | -0.64502 | -0.07338 |
|                               | H  | 3.93650  | -1.46221 | 0.25448  |                               | H | -4.64375 | -1.17410 | -0.11999 |
|                               | C  | 1.84363  | 0.00798  | 2.58764  |                               | C | -2.50426 | -1.35607 | -0.03034 |
|                               | H  | 1.38944  | 0.98353  | 2.75849  |                               | H | -2.52656 | -2.44097 | -0.04137 |
|                               | H  | 1.06120  | -0.74880 | 2.54973  |                               |   |          |          |          |
|                               | H  | 2.49160  | -0.21840 | 3.43579  |                               |   |          |          |          |
|                               | C  | 2.79442  | -0.26245 | -2.04197 |                               |   |          |          |          |
|                               | H  | 3.64126  | -0.79760 | -1.62089 |                               |   |          |          |          |

|   |          |          |          |
|---|----------|----------|----------|
| H | 1.99868  | -0.98290 | -2.21928 |
| H | 3.09822  | 0.13878  | -3.01062 |
| C | 1.16413  | 1.60667  | -1.88259 |
| H | 0.33552  | 0.92676  | -2.07977 |
| H | 0.79999  | 2.45066  | -1.30197 |
| H | 1.53149  | 1.97876  | -2.84042 |
| C | -1.78625 | 2.79771  | -0.48093 |
| C | -1.07798 | 2.35807  | 0.65723  |
| C | -2.57291 | 0.35985  | 0.84185  |
| C | -3.30405 | 0.78500  | -0.28573 |
| C | -2.72606 | 1.84992  | -1.17571 |
| H | -3.52010 | 2.40158  | -1.68366 |
| H | -2.16165 | 1.33879  | -1.97018 |
| H | -0.95611 | 0.83469  | 2.18367  |
| C | 0.07963  | 4.48654  | 0.75231  |
| H | 0.79949  | 5.14158  | 1.22725  |
| C | -0.14195 | 3.21738  | 1.25721  |
| H | 0.39994  | 2.88085  | 2.13140  |
| C | -0.63360 | 4.92122  | -0.36416 |
| H | -0.46981 | 5.91595  | -0.76008 |
| C | -1.56111 | 4.07808  | -0.96908 |
| H | -2.11342 | 4.42101  | -1.83688 |
| C | -4.26845 | -1.30178 | 1.31158  |
| H | -4.64011 | -2.11547 | 1.92156  |
| C | -3.07022 | -0.69131 | 1.62881  |
| H | -2.49706 | -1.02756 | 2.48274  |
| C | -4.99549 | -0.86752 | 0.20294  |
| H | -5.93654 | -1.34156 | -0.04790 |
| C | -4.51223 | 0.17174  | -0.58487 |
| H | -5.07822 | 0.50124  | -1.44893 |

|                               |    |          |          |          |                               |    |          |          |          |
|-------------------------------|----|----------|----------|----------|-------------------------------|----|----------|----------|----------|
| <b>P2 (sixtet)</b>            | Fe | 1.66257  | -0.00009 | -0.02362 | <b>P2-O (sixtet)</b>          | Fe | -1.72517 | -0.00928 | 0.03828  |
| B3LYP+IDSCRF-D3/TZP-DKH(-dfg) | Cl | 2.69077  | 1.83431  | -0.71773 | B3LYP+IDSCRF-D3/TZP-DKH(-dfg) | Cl | -2.62199 | -1.78232 | -0.90188 |
|                               | Cl | 1.55418  | -0.00031 | 2.19407  |                               | Cl | -1.67496 | -0.08920 | 2.22683  |
|                               | O  | 0.00240  | -0.00014 | -0.93185 |                               | O  | 0.06051  | -0.02280 | -1.00501 |
|                               | N  | -1.37778 | -0.00009 | -0.88965 |                               | N  | 1.55308  | -0.01190 | -0.94819 |
|                               | C  | -1.91255 | -1.34276 | -0.28425 |                               | C  | 1.93902  | 1.29857  | -0.31168 |
|                               | C  | -1.72613 | -1.26515 | 1.23077  |                               | C  | 1.63573  | 1.29803  | 1.19514  |
|                               | H  | -2.18869 | -2.15681 | 1.65999  |                               | H  | 2.05303  | 2.20704  | 1.63526  |
|                               | H  | -0.66184 | -1.32348 | 1.45786  |                               | H  | 0.55519  | 1.36076  | 1.34052  |
|                               | C  | -2.30597 | 0.00024  | 1.86613  |                               | C  | 2.16690  | 0.05750  | 1.91726  |
|                               | H  | -2.06578 | 0.00033  | 2.93058  |                               | H  | 1.83109  | 0.07398  | 2.95616  |
|                               | H  | -3.39708 | 0.00032  | 1.80058  |                               | H  | 3.25938  | 0.07875  | 1.95044  |
|                               | C  | -3.37455 | -1.55290 | -0.69645 |                               | C  | 3.43473  | 1.54742  | -0.58572 |
|                               | H  | -4.08144 | -0.96451 | -0.12237 |                               | H  | 4.09586  | 0.98238  | 0.06245  |
|                               | H  | -3.61564 | -2.60240 | -0.52941 |                               | H  | 3.63887  | 2.60399  | -0.41065 |
|                               | H  | -3.53169 | -1.35111 | -1.75866 |                               | H  | 3.68239  | 1.31885  | -1.62234 |
|                               | C  | -1.07773 | -2.46820 | -0.89611 |                               | C  | 1.17208  | 2.42220  | -1.02090 |
|                               | H  | -1.17742 | -2.48829 | -1.98427 |                               | H  | 1.35339  | 2.38821  | -2.09750 |
|                               | H  | -1.45465 | -3.41487 | -0.50735 |                               | H  | 1.52775  | 3.38279  | -0.64671 |
|                               | H  | -0.02368 | -2.38955 | -0.65065 |                               | H  | 0.10100  | 2.37373  | -0.84655 |
|                               | C  | -1.91247 | 1.34272  | -0.28453 |                               | C  | 1.96420  | -1.28895 | -0.25782 |
|                               | C  | -1.72594 | 1.26540  | 1.23049  |                               | C  | 1.68114  | -1.23236 | 1.25157  |
|                               | H  | -2.18827 | 2.15724  | 1.65958  |                               | H  | 2.14108  | -2.10379 | 1.72416  |
|                               | H  | -0.66162 | 1.32358  | 1.45747  |                               | H  | 0.60730  | -1.33331 | 1.41126  |
|                               | C  | -3.37448 | 1.55286  | -0.69670 |                               | C  | 3.45911  | -1.53048 | -0.54177 |
|                               | H  | -4.08138 | 0.96469  | -0.12242 |                               | H  | 4.11998  | -0.93274 | 0.07693  |
|                               | H  | -3.61546 | 2.60242  | -0.52995 |                               | H  | 3.67862  | -2.57692 | -0.32816 |
|                               | H  | -3.53169 | 1.35076  | -1.75884 |                               | H  | 3.69229  | -1.33922 | -1.58922 |
|                               | C  | -1.07764 | 2.46796  | -0.89672 |                               | C  | 1.20095  | -2.45320 | -0.90350 |
|                               | H  | -1.17748 | 2.48782  | -1.98487 |                               | H  | 1.37440  | -2.47611 | -1.98184 |
|                               | H  | -1.45446 | 3.41474  | -0.50814 |                               | H  | 1.56635  | -3.39022 | -0.48195 |
|                               | H  | -0.02359 | 2.38927  | -0.65134 |                               | H  | 0.12995  | -2.40426 | -0.72409 |
|                               | Cl | 2.69122  | -1.83380 | -0.71870 |                               | Cl | -2.62825 | 1.85305  | -0.69249 |

|                     |                               |                      |                              |
|---------------------|-------------------------------|----------------------|------------------------------|
|                     | H -1.66000 -0.00020 -1.87672  |                      | H -0.10387 -0.10545 -1.95337 |
| <b>TS2 (sixtet)</b> | C 1.45584 -3.74898 -0.27821   | <b>PIa (singlet)</b> | C 0.00000 1.39963 -0.00026   |
| B3LYP+IDSCRF-       | C 1.64568 -2.56129 -1.21978   | B3LYP+IDSCRF-        | C -1.21929 -0.72013 -0.00024 |
| D3/TZP-DKH(-dfg)    | C 0.40459 -1.66075 -1.33352   | D3/TZP-DKH(-dfg)     | C -1.21929 0.72013 -0.00024  |
|                     | N -0.00506 -1.29875 0.08073   |                      | C 1.21929 0.72013 -0.00024   |
|                     | C -0.24725 -2.40733 1.08890   |                      | C 1.21929 -0.72013 -0.00024  |
|                     | C 1.02455 -3.26951 1.10648    |                      | C 0.00000 -1.39963 -0.00026  |
|                     | H 2.39149 -4.30775 -0.19876   |                      | H 0.00000 -2.48471 -0.00038  |
|                     | H 0.71988 -4.44595 -0.68486   |                      | H 0.00000 2.48471 -0.00038   |
|                     | H 1.90422 -2.90132 -2.22537   |                      | C -3.64756 0.71109 0.00030   |
|                     | H 2.48671 -1.95862 -0.86600   |                      | H -4.59154 1.24270 0.00058   |
|                     | H 0.84722 -4.11606 1.77395    |                      | C -2.47169 1.40266 -0.00000  |
|                     | H 1.83661 -2.68542 1.54943    |                      | H -2.47087 2.48691 0.00006   |
|                     | O -1.02100 -0.39062 0.08460   |                      | C -3.64756 -0.71109 0.00030  |
|                     | Fe -2.71550 0.27619 -0.17279  |                      | H -4.59154 -1.24270 0.00058  |
|                     | Cl -2.48441 1.94003 -1.64679  |                      | C -2.47169 -1.40266 -0.00000 |
|                     | Cl -4.16714 -1.22750 -0.95413 |                      | H -2.47087 -2.48691 0.00006  |
|                     | Cl -3.37616 0.98074 1.85518   |                      | C 3.64756 0.71109 0.00030    |
|                     | C 1.84967 0.55098 1.19213     |                      | H 4.59154 1.24270 0.00058    |
|                     | H 1.15719 -0.32561 0.65414    |                      | C 2.47169 1.40266 -0.00000   |
|                     | C -1.49857 -3.24220 0.77526   |                      | H 2.47087 2.48691 0.00006    |
|                     | H -1.75340 -3.82917 1.65899   |                      | C 3.64756 -0.71109 0.00030   |
|                     | H -2.34681 -2.60317 0.54000   |                      | H 4.59154 -1.24270 0.00058   |
|                     | H -1.35672 -3.93617 -0.04725  |                      | C 2.47169 -1.40266 -0.00000  |
|                     | C -0.46416 -1.75538 2.46010   |                      | H 2.47087 -2.48691 0.00006   |
|                     | H 0.39774 -1.17384 2.77982    |                      |                              |
|                     | H -1.34008 -1.10779 2.45179   |                      |                              |
|                     | H -0.62162 -2.54006 3.20109   |                      |                              |
|                     | C -0.72170 -2.33415 -2.13392  |                      |                              |
|                     | H -0.86818 -3.37766 -1.87192  |                      |                              |

|                                   |   |          |          |          |                                   |   |          |         |          |
|-----------------------------------|---|----------|----------|----------|-----------------------------------|---|----------|---------|----------|
|                                   | H | -1.66663 | -1.81206 | -1.99896 |                                   |   |          |         |          |
|                                   | H | -0.46424 | -2.29497 | -3.19333 |                                   |   |          |         |          |
|                                   | C | 0.76726  | -0.35686 | -2.05335 |                                   |   |          |         |          |
|                                   | H | -0.09395 | 0.30563  | -2.12659 |                                   |   |          |         |          |
|                                   | H | 1.57165  | 0.17123  | -1.54938 |                                   |   |          |         |          |
|                                   | H | 1.11121  | -0.59582 | -3.06067 |                                   |   |          |         |          |
|                                   | C | 3.68226  | 1.26333  | -0.33335 |                                   |   |          |         |          |
|                                   | C | 3.20267  | 0.38369  | 0.67867  |                                   |   |          |         |          |
|                                   | C | 1.14426  | 1.78832  | 0.88702  |                                   |   |          |         |          |
|                                   | C | 1.66023  | 2.65892  | -0.12642 |                                   |   |          |         |          |
|                                   | C | 2.88999  | 2.36181  | -0.71289 |                                   |   |          |         |          |
|                                   | H | 3.27164  | 3.02915  | -1.47974 |                                   |   |          |         |          |
|                                   | H | 1.73538  | 0.22927  | 2.22622  |                                   |   |          |         |          |
|                                   | C | 5.27778  | -0.84688 | 0.54501  |                                   |   |          |         |          |
|                                   | H | 5.90884  | -1.65548 | 0.89354  |                                   |   |          |         |          |
|                                   | C | 4.03382  | -0.66099 | 1.10864  |                                   |   |          |         |          |
|                                   | H | 3.69154  | -1.32155 | 1.89592  |                                   |   |          |         |          |
|                                   | C | 5.74255  | 0.00208  | -0.47975 |                                   |   |          |         |          |
|                                   | H | 6.71869  | -0.16620 | -0.91636 |                                   |   |          |         |          |
|                                   | C | 4.96000  | 1.04142  | -0.90955 |                                   |   |          |         |          |
|                                   | H | 5.30663  | 1.70989  | -1.68898 |                                   |   |          |         |          |
|                                   | C | -0.72843 | 3.27867  | 1.16362  |                                   |   |          |         |          |
|                                   | H | -1.67157 | 3.50528  | 1.64292  |                                   |   |          |         |          |
|                                   | C | -0.05539 | 2.13433  | 1.52164  |                                   |   |          |         |          |
|                                   | H | -0.47950 | 1.47368  | 2.26505  |                                   |   |          |         |          |
|                                   | C | -0.23427 | 4.13281  | 0.15250  |                                   |   |          |         |          |
|                                   | H | -0.79842 | 5.01373  | -0.12422 |                                   |   |          |         |          |
|                                   | C | 0.93482  | 3.83087  | -0.48338 |                                   |   |          |         |          |
|                                   | H | 1.32489  | 4.46895  | -1.26739 |                                   |   |          |         |          |
| <b>R1b</b> (singlet)              | C | 1.39230  | -1.32788 | -0.05429 | <b>TS1b</b> (quintet)             | C | -2.11601 | 2.97706 | 0.12177  |
| B3LYP+IDSCRF-<br>D3/TZP-DKH(-dfg) | C | 0.03234  | -1.06777 | -0.17559 | B3LYP+IDSCRF-<br>D3/TZP-DKH(-dfg) | C | -1.51795 | 2.40470 | -1.15958 |
|                                   | C | 2.29552  | -0.27894 | 0.09478  |                                   | C | -0.09017 | 1.85905 | -1.00893 |
|                                   | H | -0.67340 | -1.88137 | -0.28800 |                                   | N | -0.08213 | 0.90169 | 0.20376  |

|   |          |          |          |    |          |          |          |
|---|----------|----------|----------|----|----------|----------|----------|
| H | 3.35516  | -0.48198 | 0.18946  | C  | -0.70702 | 1.37756  | 1.53672  |
| C | -0.44374 | 0.24394  | -0.14556 | C  | -2.10585 | 1.92218  | 1.22465  |
| C | 1.82904  | 1.03068  | 0.12749  | H  | -3.14288 | 3.29489  | -0.06982 |
| H | 2.52439  | 1.85209  | 0.25105  | H  | -1.57317 | 3.87094  | 0.43571  |
| C | 0.46639  | 1.28809  | 0.01284  | H  | -1.48960 | 3.16003  | -1.94788 |
| H | 0.10709  | 2.31076  | 0.04983  | H  | -2.16558 | 1.60267  | -1.52027 |
| H | 1.74915  | -2.35053 | -0.07793 | H  | -2.50935 | 2.32758  | 2.15494  |
| C | -1.92013 | 0.52752  | -0.30493 | H  | -2.75650 | 1.09242  | 0.93677  |
| H | -2.19361 | 0.49543  | -1.36262 | O  | 1.13011  | 0.39267  | 0.44907  |
| H | -2.14400 | 1.53824  | 0.05621  | Fe | 2.61627  | -0.61683 | -0.02315 |
| O | -2.76317 | -0.43772 | 0.32421  | Cl | 4.04269  | 0.70405  | -1.09351 |
| H | -2.52979 | -0.47475 | 1.26001  | Cl | 3.36503  | -1.41462 | 1.89882  |
|   |          |          |          | Cl | 1.89973  | -2.27591 | -1.38379 |
|   |          |          |          | C  | -4.84073 | -1.70542 | 0.83994  |
|   |          |          |          | C  | -3.46278 | -1.83211 | 0.73886  |
|   |          |          |          | C  | -5.56850 | -1.09700 | -0.17987 |
|   |          |          |          | H  | -2.90097 | -2.31945 | 1.52375  |
|   |          |          |          | H  | -6.64340 | -0.99865 | -0.09607 |
|   |          |          |          | C  | -2.79107 | -1.34919 | -0.39135 |
|   |          |          |          | C  | -4.91059 | -0.62903 | -1.31536 |
|   |          |          |          | H  | -5.47364 | -0.17441 | -2.12071 |
|   |          |          |          | C  | -3.53424 | -0.75553 | -1.42129 |
|   |          |          |          | H  | -3.02904 | -0.40708 | -2.31440 |
|   |          |          |          | H  | -5.35122 | -2.08716 | 1.71525  |
|   |          |          |          | C  | -1.32896 | -1.41646 | -0.50882 |
|   |          |          |          | H  | -0.94282 | -1.46516 | -1.52782 |
|   |          |          |          | H  | -0.85673 | -0.17933 | -0.18456 |
|   |          |          |          | O  | -0.70678 | -2.27400 | 0.35235  |
|   |          |          |          | H  | 0.19617  | -2.44190 | 0.01318  |
|   |          |          |          | C  | 0.19060  | 2.42386  | 2.21193  |
|   |          |          |          | H  | -0.13418 | 2.52130  | 3.24833  |
|   |          |          |          | H  | 1.22869  | 2.09681  | 2.21086  |
|   |          |          |          | H  | 0.12835  | 3.40682  | 1.75660  |



|                               |                              |                               |                              |
|-------------------------------|------------------------------|-------------------------------|------------------------------|
|                               |                              |                               | C -0.79022 0.16185 2.46174   |
|                               |                              |                               | H -1.40164 -0.63202 2.04685  |
|                               |                              |                               | H 0.20044 -0.23694 2.67250   |
|                               |                              |                               | H -1.24472 0.48032 3.40042   |
|                               |                              |                               | C 0.94915 2.97167 -0.82038   |
|                               |                              |                               | H 0.64443 3.72502 -0.10163   |
|                               |                              |                               | H 1.90888 2.55552 -0.52082   |
|                               |                              |                               | H 1.08487 3.46873 -1.78137   |
|                               |                              |                               | C 0.29152 1.06056 -2.25759   |
|                               |                              |                               | H 1.29595 0.64928 -2.18927   |
|                               |                              |                               | H -0.40774 0.25483 -2.46582  |
|                               |                              |                               | H 0.27103 1.73898 -3.11083   |
| <b>TS1b</b> (septet)          | C -2.15193 2.96388 0.06500   | <b>TS1b-O</b> (quintet)       | C -0.90044 3.98556 0.26443   |
| B3LYP+IDSCRF-D3/TZP-DKH(-dfg) | C -1.53166 2.37091 -1.19590  | B3LYP+IDSCRF-D3/TZP-DKH(-dfg) | C -0.78451 3.40042 -1.13879  |
|                               | C -0.10035 1.84109 -1.01465  |                               | C 0.15540 2.18426 -1.21591   |
|                               | N -0.10069 0.91020 0.21088   |                               | N -0.24865 1.25016 -0.12431  |
|                               | C -0.73774 1.40916 1.52271   |                               | C -0.53041 1.66037 1.28331   |
|                               | C -2.14072 1.93220 1.18928   |                               | C -1.41972 2.91532 1.21811   |
|                               | H -3.18030 3.26536 -0.14514  |                               | H -1.58632 4.83586 0.25451   |
|                               | H -1.62353 3.87104 0.36592   |                               | H 0.06373 4.37283 0.60292    |
|                               | H -1.50048 3.10959 -2.00000  |                               | H -0.42393 4.14696 -1.84974  |
|                               | H -2.16707 1.55478 -1.54679  |                               | H -1.77974 3.09215 -1.47413  |
|                               | H -2.55705 2.35183 2.10780   |                               | H -1.51826 3.30621 2.23309   |
|                               | H -2.77967 1.08972 0.91230   |                               | H -2.41919 2.61039 0.89359   |
|                               | O 1.13170 0.42113 0.49325    |                               | O 0.35649 0.02935 -0.21837   |
|                               | Fe 2.61472 -0.60263 -0.02468 |                               | Fe 2.10631 -0.86976 0.18533  |
|                               | Cl 4.01136 0.69162 -1.14611  |                               | Cl 3.83934 0.39233 0.64527   |
|                               | Cl 3.46378 -1.34178 1.87024  |                               | Cl 1.53766 -2.18713 1.85560  |
|                               | Cl 1.91739 -2.31484 -1.30269 |                               | Cl 2.28785 -1.92939 -1.78831 |
|                               | C -4.84858 -1.69435 0.84234  |                               | C -4.15609 -1.96190 1.02790  |
|                               | C -3.46938 -1.82518 0.76723  |                               | C -2.94379 -2.26021 0.43123  |
|                               | C -5.55927 -1.11523 -0.20630 |                               | C -4.93762 -0.90864 0.55115  |
|                               | H -2.92076 -2.28999 1.57527  |                               | H -2.32548 -3.06403 0.80692  |

|                               |   |          |          |          |                               |   |          |          |          |
|-------------------------------|---|----------|----------|----------|-------------------------------|---|----------|----------|----------|
|                               | H | -6.63554 | -1.01320 | -0.14252 |                               | H | -5.88259 | -0.67673 | 1.02670  |
|                               | C | -2.77915 | -1.37718 | -0.36599 |                               | C | -2.49787 | -1.51112 | -0.67142 |
|                               | C | -4.88270 | -0.68158 | -1.34430 |                               | C | -4.50237 | -0.15709 | -0.53791 |
|                               | H | -5.43214 | -0.25014 | -2.17197 |                               | H | -5.11013 | 0.65655  | -0.91405 |
|                               | C | -3.50507 | -0.81307 | -1.42438 |                               | C | -3.29343 | -0.45348 | -1.14630 |
|                               | H | -2.98532 | -0.49277 | -2.32014 |                               | H | -2.96299 | 0.12388  | -2.00009 |
|                               | H | -5.37379 | -2.04981 | 1.72043  |                               | H | -4.49604 | -2.54588 | 1.87429  |
|                               | C | -1.31414 | -1.44749 | -0.45959 |                               | C | -1.20029 | -1.75795 | -1.27143 |
|                               | H | -0.92254 | -1.52980 | -1.47451 |                               | H | -1.05149 | -1.40948 | -2.29750 |
|                               | H | -0.85494 | -0.22123 | -0.16106 |                               | H | -0.43352 | -0.77640 | -0.68190 |
|                               | O | -0.70987 | -2.29664 | 0.42761  |                               | O | -0.61301 | -2.94880 | -0.96300 |
|                               | H | 0.19921  | -2.47170 | 0.11265  |                               | H | 0.28679  | -2.97088 | -1.34117 |
|                               | C | 0.13933  | 2.48084  | 2.18679  |                               | C | 0.75213  | 1.92636  | 2.08912  |
|                               | H | -0.19460 | 2.59270  | 3.21897  |                               | H | 0.48301  | 2.14734  | 3.12337  |
|                               | H | 1.18190  | 2.16897  | 2.19845  |                               | H | 1.40028  | 1.05112  | 2.10331  |
|                               | H | 0.06616  | 3.45456  | 1.71315  |                               | H | 1.32760  | 2.76430  | 1.70400  |
|                               | C | -0.81985 | 0.21422  | 2.47596  |                               | C | -1.31213 | 0.52968  | 1.96044  |
|                               | H | -1.41048 | -0.59945 | 2.06899  |                               | H | -2.22447 | 0.30606  | 1.41033  |
|                               | H | 0.17292  | -0.16375 | 2.71313  |                               | H | -0.71352 | -0.37696 | 2.03805  |
|                               | H | -1.29679 | 0.54675  | 3.39875  |                               | H | -1.58513 | 0.84252  | 2.96958  |
|                               | C | 0.92539  | 2.96956  | -0.84251 |                               | C | 1.62808  | 2.61385  | -1.12964 |
|                               | H | 0.60116  | 3.73971  | -0.15025 |                               | H | 1.84686  | 3.19446  | -0.23716 |
|                               | H | 1.88388  | 2.57211  | -0.51508 |                               | H | 2.28996  | 1.75070  | -1.13724 |
|                               | H | 1.07284  | 3.44129  | -1.81467 |                               | H | 1.87169  | 3.22724  | -1.99906 |
|                               | C | 0.29880  | 1.02400  | -2.24667 |                               | C | -0.05750 | 1.46567  | -2.55408 |
|                               | H | 1.31368  | 0.64053  | -2.17369 |                               | H | 0.61512  | 0.61459  | -2.66073 |
|                               | H | -0.37995 | 0.19599  | -2.43485 |                               | H | -1.08658 | 1.11929  | -2.64999 |
|                               | H | 0.25992  | 1.68205  | -3.11539 |                               | H | 0.14363  | 2.16085  | -3.37017 |
| <b>TS1b-O</b> (septet)        | C | -0.92667 | 4.01903  | 0.26773  | <b>INT1b</b> (doublet)        | C | -1.34043 | -1.34200 | -0.00004 |
| B3LYP+IDSCRF-D3/TZP-DKH(-dfg) | C | -0.79897 | 3.44175  | -1.13784 | B3LYP+IDSCRF-D3/TZP-DKH(-dfg) | C | 0.01699  | -1.08030 | 0.00014  |
|                               | C | 0.13687  | 2.22161  | -1.21221 |                               | C | -2.27228 | -0.30131 | -0.00020 |
|                               | N | -0.29685 | 1.28059  | -0.13953 |                               | H | 0.73130  | -1.89259 | 0.00035  |
|                               | C | -0.55548 | 1.68880  | 1.27183  |                               | H | -3.33310 | -0.51662 | -0.00051 |

|    |          |          |          |   |          |          |          |
|----|----------|----------|----------|---|----------|----------|----------|
| C  | -1.44836 | 2.94229  | 1.21294  | C | 0.49248  | 0.25834  | 0.00018  |
| H  | -1.61469 | 4.86776  | 0.25767  | C | -1.82030 | 1.02275  | -0.00009 |
| H  | 0.03412  | 4.40728  | 0.61486  | H | -2.53591 | 1.83642  | -0.00008 |
| H  | -0.42899 | 4.19146  | -1.84083 | C | -0.46943 | 1.30434  | 0.00010  |
| H  | -1.79178 | 3.13855  | -1.48455 | H | -0.13011 | 2.33412  | 0.00028  |
| H  | -1.55170 | 3.32699  | 2.22994  | H | -1.68395 | -2.36990 | -0.00003 |
| H  | -2.44563 | 2.63674  | 0.88243  | C | 1.85987  | 0.56647  | 0.00000  |
| O  | 0.36130  | 0.06748  | -0.22337 | H | 2.22174  | 1.58683  | 0.00005  |
| Fe | 2.07433  | -0.84789 | 0.18524  | O | 2.78234  | -0.43599 | -0.00007 |
| Cl | 3.80924  | 0.38107  | 0.70268  | H | 3.66989  | -0.06012 | -0.00010 |
| Cl | 1.53295  | -2.23387 | 1.79733  |   |          |          |          |
| Cl | 2.36590  | -1.91503 | -1.75627 |   |          |          |          |
| C  | -4.11540 | -2.03064 | 1.02311  |   |          |          |          |
| C  | -2.89894 | -2.30888 | 0.42473  |   |          |          |          |
| C  | -4.91300 | -0.98785 | 0.55021  |   |          |          |          |
| H  | -2.26989 | -3.10637 | 0.79602  |   |          |          |          |
| H  | -5.86156 | -0.77198 | 1.02620  |   |          |          |          |
| C  | -2.46273 | -1.54853 | -0.67408 |   |          |          |          |
| C  | -4.48799 | -0.22556 | -0.53611 |   |          |          |          |
| H  | -5.10753 | 0.58068  | -0.90910 |   |          |          |          |
| C  | -3.27410 | -0.50022 | -1.14363 |   |          |          |          |
| H  | -2.94843 | 0.08918  | -1.99099 |   |          |          |          |
| H  | -4.44659 | -2.62304 | 1.86720  |   |          |          |          |
| C  | -1.15824 | -1.77129 | -1.27304 |   |          |          |          |
| H  | -1.02629 | -1.42542 | -2.30402 |   |          |          |          |
| H  | -0.41793 | -0.79761 | -0.69404 |   |          |          |          |
| O  | -0.57355 | -2.97758 | -0.98631 |   |          |          |          |
| H  | 0.32709  | -2.99248 | -1.35709 |   |          |          |          |
| C  | 0.72494  | 1.95692  | 2.07956  |   |          |          |          |
| H  | 0.45557  | 2.17305  | 3.11488  |   |          |          |          |
| H  | 1.37535  | 1.08326  | 2.09200  |   |          |          |          |
| H  | 1.30006  | 2.79751  | 1.70002  |   |          |          |          |
| C  | -1.33351 | 0.55580  | 1.95056  |   |          |          |          |

|                                |   |          |          |          |                                |   |                            |
|--------------------------------|---|----------|----------|----------|--------------------------------|---|----------------------------|
|                                | H | -2.24271 | 0.32527  | 1.39787  |                                |   |                            |
|                                | H | -0.73102 | -0.34850 | 2.02823  |                                |   |                            |
|                                | H | -1.61020 | 0.86573  | 2.95977  |                                |   |                            |
|                                | C | 1.61018  | 2.64571  | -1.10982 |                                |   |                            |
|                                | H | 1.82137  | 3.23243  | -0.21950 |                                |   |                            |
|                                | H | 2.26798  | 1.77903  | -1.10372 |                                |   |                            |
|                                | H | 1.87005  | 3.25142  | -1.97998 |                                |   |                            |
|                                | C | -0.06600 | 1.51542  | -2.55891 |                                |   |                            |
|                                | H | 0.60678  | 0.66451  | -2.66652 |                                |   |                            |
|                                | H | -1.09408 | 1.16804  | -2.66262 |                                |   |                            |
|                                | H | 0.14083  | 2.21522  | -3.36990 |                                |   |                            |
| <b>INT1b'</b> (doublet)        | C | 1.35444  | 1.33187  | 0.00004  | <b>P1b</b> (singlet)           | C | -1.32768 -1.32439 -0.00007 |
| B3LYP+IDSCRF-D3/TZP-DKH(-dfg)  | C | -0.01376 | 1.08115  | 0.00012  | B3LYP+IDSCRF-D3/TZP-DKH(-dfg)  | C | 0.03954 -1.10197 0.00019   |
|                                | C | 2.26126  | 0.27626  | -0.00007 |                                | C | -2.21058 -0.24354 -0.00021 |
|                                | H | -0.72543 | 1.89691  | 0.00018  |                                | H | 0.74346 -1.92431 0.00032   |
|                                | H | 3.32637  | 0.47363  | -0.00013 |                                | H | -3.27896 -0.42145 -0.00042 |
|                                | C | -0.48489 | -0.22815 | 0.00008  |                                | C | 0.53237 0.20729 0.00032    |
|                                | C | 1.79394  | -1.03475 | -0.00011 |                                | C | -1.72618 1.06070 -0.00010  |
|                                | H | 2.49394  | -1.86164 | -0.00021 |                                | H | -2.41466 1.89619 -0.00021  |
|                                | C | 0.42681  | -1.28414 | -0.00003 |                                | C | -0.35528 1.28536 0.00016   |
|                                | H | 0.06544  | -2.30773 | -0.00006 |                                | H | 0.03242 2.29809 0.00026    |
|                                | H | 1.71349  | 2.35417  | 0.00006  |                                | H | -1.71307 -2.33627 -0.00016 |
|                                | C | -1.96737 | -0.52771 | 0.00024  |                                | C | 1.98550 0.46493 0.00066    |
|                                | H | -2.23056 | -1.18203 | 0.85933  |                                | H | 2.26508 1.53849 -0.00062   |
|                                | H | -2.23057 | -1.18315 | -0.85798 |                                | O | 2.84245 -0.39263 -0.00061  |
|                                | O | -2.82941 | 0.51532  | -0.00035 |                                |   |                            |
| <b>R2</b> (quintet)            | C | -3.98900 | -0.00011 | 0.24973  | <b>R2</b> (septet)             | C | -3.98966 0.23964 0.38321   |
| B3LYP+IDSCRF-D3a/TZP-DKH(-dfg) | C | -3.36058 | 1.24364  | -0.36730 | B3LYP+IDSCRF-D3a/TZP-DKH(-dfg) | C | -3.27731 1.40759 -0.28617  |
|                                | C | -1.84198 | 1.34502  | -0.15167 |                                | C | -1.74425 1.35006 -0.18052  |
|                                | N | -1.22060 | 0.00002  | -0.41966 |                                | N | -1.27844 -0.05495 -0.42807 |
|                                | C | -1.84185 | -1.34504 | -0.15168 |                                | C | -2.03799 -1.32338 -0.16155 |
|                                | C | -3.36046 | -1.24380 | -0.36730 |                                | C | -3.54569 -1.05772 -0.28067 |
|                                | H | -5.06419 | -0.00017 | 0.05813  |                                | H | -5.06999 0.35806 0.27564   |

|                                        |    |          |          |          |                                        |    |          |          |          |
|----------------------------------------|----|----------|----------|----------|----------------------------------------|----|----------|----------|----------|
|                                        | H  | -3.87150 | -0.00010 | 1.33618  |                                        | H  | -3.78776 | 0.21982  | 1.45715  |
|                                        | H  | -3.80624 | 2.15464  | 0.03754  |                                        | H  | -3.59399 | 2.36237  | 0.13852  |
|                                        | H  | -3.56214 | 1.24470  | -1.44300 |                                        | H  | -3.55518 | 1.42700  | -1.34443 |
|                                        | H  | -3.80602 | -2.15485 | 0.03755  |                                        | H  | -4.06145 | -1.92000 | 0.14701  |
|                                        | H  | -3.56203 | -1.24489 | -1.44300 |                                        | H  | -3.81658 | -1.02217 | -1.34046 |
|                                        | O  | 0.01519  | 0.00010  | -0.74018 |                                        | O  | -0.01869 | -0.22286 | -0.65911 |
|                                        | Fe | 1.80034  | 0.00001  | 0.00201  |                                        | Fe | 1.82951  | -0.03879 | 0.00966  |
|                                        | Cl | 2.69928  | 1.85843  | -0.76021 |                                        | Cl | 2.56336  | 1.98767  | -0.41755 |
|                                        | Cl | 1.62386  | 0.00017  | 2.19574  |                                        | Cl | 1.72359  | -0.42966 | 2.17300  |
|                                        | Cl | 2.69916  | -1.85857 | -0.75995 |                                        | Cl | 2.90788  | -1.58921 | -1.10000 |
|                                        | C  | -1.49452 | -1.75308 | 1.28936  |                                        | C  | -1.65602 | -1.80065 | 1.25013  |
|                                        | H  | -1.84165 | -2.77522 | 1.44860  |                                        | H  | -2.10550 | -2.78055 | 1.41911  |
|                                        | H  | -0.41895 | -1.72470 | 1.45387  |                                        | H  | -0.57571 | -1.89060 | 1.34794  |
|                                        | H  | -1.97098 | -1.11240 | 2.02892  |                                        | H  | -2.01444 | -1.12324 | 2.02390  |
|                                        | C  | -1.23104 | -2.34752 | -1.13428 |                                        | C  | -1.59929 | -2.36144 | -1.19869 |
|                                        | H  | -1.36349 | -2.01501 | -2.16483 |                                        | H  | -1.75982 | -1.99156 | -2.21247 |
|                                        | H  | -0.16880 | -2.49890 | -0.95214 |                                        | H  | -0.54918 | -2.62271 | -1.08551 |
|                                        | H  | -1.74591 | -3.30144 | -1.01130 |                                        | H  | -2.20120 | -3.26095 | -1.06082 |
|                                        | C  | -1.49471 | 1.75309  | 1.28938  |                                        | C  | -1.25738 | 1.76859  | 1.21704  |
|                                        | H  | -1.97111 | 1.11235  | 2.02893  |                                        | H  | -1.72891 | 1.18646  | 2.00745  |
|                                        | H  | -0.41914 | 1.72481  | 1.45390  |                                        | H  | -0.17807 | 1.65684  | 1.30633  |
|                                        | H  | -1.84194 | 2.77519  | 1.44862  |                                        | H  | -1.50423 | 2.82023  | 1.37015  |
|                                        | C  | -1.23126 | 2.34757  | -1.13424 |                                        | C  | -1.11769 | 2.24990  | -1.24939 |
|                                        | H  | -0.16903 | 2.49903  | -0.95210 |                                        | H  | -0.03617 | 2.29977  | -1.15458 |
|                                        | H  | -1.36367 | 2.01507  | -2.16480 |                                        | H  | -1.36942 | 1.89580  | -2.25026 |
|                                        | H  | -1.74620 | 3.30145  | -1.01125 |                                        | H  | -1.52155 | 3.25648  | -1.12959 |
| <b>R1a</b> (singlet)                   | C  | -0.00000 | 1.42016  | 0.70482  | <b>INT1a</b> (doublet)                 | C  | 0.00000  | 1.39443  | 0.05100  |
| B3LYP+IDSCRF-<br>D3a/TZP-DKH(-<br>dfg) | C  | 1.25293  | -0.69941 | 0.26705  | B3LYP+IDSCRF-<br>D3a/TZP-DKH(-<br>dfg) | C  | 1.27924  | -0.70551 | 0.02179  |
|                                        | C  | 1.25293  | 0.69946  | 0.26693  |                                        | C  | 1.24473  | 0.71177  | 0.02876  |
|                                        | C  | -1.25294 | 0.69946  | 0.26693  |                                        | C  | -1.24473 | 0.71177  | 0.02876  |
|                                        | C  | -1.25294 | -0.69941 | 0.26705  |                                        | C  | -1.27924 | -0.70551 | 0.02179  |
|                                        | C  | -0.00000 | -1.42003 | 0.70508  |                                        | C  | 0.00000  | -1.50336 | 0.08686  |
|                                        | H  | 0.00000  | -2.44888 | 0.33968  |                                        | H  | 0.00000  | -2.25377 | -0.71251 |

|                                |    |          |          |          |                                |    |          |          |          |
|--------------------------------|----|----------|----------|----------|--------------------------------|----|----------|----------|----------|
|                                | H  | -0.00000 | -1.48624 | 1.80279  |                                | H  | 0.00000  | -2.08642 | 1.01805  |
|                                | H  | -0.00000 | 2.44894  | 0.33923  |                                | H  | 0.00000  | 2.47887  | 0.05882  |
|                                | C  | 3.54257  | 0.69519  | -0.51200 |                                | C  | 3.67704  | 0.75186  | -0.04100 |
|                                | H  | 4.42760  | 1.24080  | -0.81811 |                                | H  | 4.60494  | 1.31150  | -0.06415 |
|                                | C  | 2.39862  | 1.38584  | -0.12711 |                                | C  | 2.46896  | 1.41860  | -0.00011 |
|                                | H  | 2.39444  | 2.47084  | -0.13638 |                                | H  | 2.44568  | 2.50302  | 0.00630  |
|                                | C  | 3.54257  | -0.69528 | -0.51188 |                                | C  | 3.70163  | -0.64472 | -0.05530 |
|                                | H  | 4.42760  | -1.24095 | -0.81790 |                                | H  | 4.64654  | -1.17367 | -0.09043 |
|                                | C  | 2.39862  | -1.38587 | -0.12687 |                                | C  | 2.50583  | -1.35574 | -0.02342 |
|                                | H  | 2.39444  | -2.47087 | -0.13595 |                                | H  | 2.52867  | -2.44102 | -0.03183 |
|                                | C  | -3.54257 | 0.69519  | -0.51202 |                                | C  | -3.67704 | 0.75186  | -0.04100 |
|                                | H  | -4.42760 | 1.24080  | -0.81813 |                                | H  | -4.60494 | 1.31150  | -0.06415 |
|                                | C  | -2.39862 | 1.38584  | -0.12712 |                                | C  | -2.46896 | 1.41860  | -0.00011 |
|                                | H  | -2.39444 | 2.47084  | -0.13639 |                                | H  | -2.44568 | 2.50302  | 0.00630  |
|                                | C  | -3.54257 | -0.69528 | -0.51189 |                                | C  | -3.70163 | -0.64472 | -0.05530 |
|                                | H  | -4.42760 | -1.24095 | -0.81791 |                                | H  | -4.64654 | -1.17367 | -0.09043 |
|                                | C  | -2.39862 | -1.38587 | -0.12687 |                                | C  | -2.50583 | -1.35574 | -0.02342 |
|                                | H  | -2.39444 | -2.47087 | -0.13596 |                                | H  | -2.52867 | -2.44102 | -0.03183 |
|                                | H  | -0.00000 | 1.48657  | 1.80253  |                                |    |          |          |          |
| <b>TS1a (quintet)</b>          | C  | 1.47938  | -3.71244 | -0.12762 | <b>TS1a (septet)</b>           | C  | 1.50615  | -3.73629 | -0.14077 |
| B3LYP+IDSCRF-D3a/TZP-DKH(-dfg) | C  | 1.67660  | -2.57485 | -1.12773 | B3LYP+IDSCRF-D3a/TZP-DKH(-dfg) | C  | 1.70357  | -2.59593 | -1.13741 |
|                                | C  | 0.43823  | -1.68587 | -1.31426 |                                | C  | 0.46166  | -1.71161 | -1.32467 |
|                                | N  | -0.01947 | -1.24776 | 0.09226  |                                | N  | 0.00343  | -1.27913 | 0.07666  |
|                                | C  | -0.25156 | -2.33032 | 1.16481  |                                | C  | -0.23206 | -2.35715 | 1.14466  |
|                                | C  | 1.02976  | -3.17186 | 1.22882  |                                | C  | 1.05023  | -3.19754 | 1.21406  |
|                                | H  | 2.41914  | -4.25660 | -0.00825 |                                | H  | 2.44667  | -4.27866 | -0.01873 |
|                                | H  | 0.75657  | -4.43804 | -0.50685 |                                | H  | 0.78617  | -4.46273 | -0.52389 |
|                                | H  | 1.94393  | -2.96897 | -2.11111 |                                | H  | 1.97755  | -2.98594 | -2.12062 |
|                                | H  | 2.51443  | -1.95393 | -0.80312 |                                | H  | 2.53663  | -1.97158 | -0.80603 |
|                                | H  | 0.85129  | -3.98873 | 1.93207  |                                | H  | 0.87115  | -4.01475 | 1.91679  |
|                                | H  | 1.83074  | -2.56317 | 1.65653  |                                | H  | 1.84846  | -2.58657 | 1.64401  |
|                                | O  | -1.01872 | -0.36327 | 0.04225  |                                | O  | -1.01133 | -0.39607 | 0.01728  |
|                                | Fe | -2.74741 | 0.28438  | -0.23130 |                                | Fe | -2.73974 | 0.27733  | -0.21500 |

|    |          |          |          |    |          |          |          |
|----|----------|----------|----------|----|----------|----------|----------|
| Cl | -2.50611 | 1.93844  | -1.68710 | Cl | -2.53743 | 1.97712  | -1.61769 |
| Cl | -4.11535 | -1.26500 | -1.05220 | Cl | -4.10191 | -1.25603 | -1.07135 |
| Cl | -3.46554 | 0.90558  | 1.78375  | Cl | -3.46366 | 0.85566  | 1.80860  |
| C  | 1.85115  | 0.47934  | 1.11955  | C  | 1.82221  | 0.50301  | 1.10920  |
| H  | 1.02280  | -0.47681 | 0.55618  | H  | 1.03571  | -0.45514 | 0.55482  |
| C  | -1.48752 | -3.17935 | 0.84200  | C  | -1.46666 | -3.20965 | 0.82163  |
| H  | -1.76025 | -3.73030 | 1.74300  | H  | -1.74133 | -3.75943 | 1.72282  |
| H  | -2.33487 | -2.55789 | 0.56154  | H  | -2.31331 | -2.58897 | 0.53711  |
| H  | -1.31897 | -3.90673 | 0.05518  | H  | -1.29493 | -3.93827 | 0.03647  |
| C  | -0.51440 | -1.62711 | 2.49883  | C  | -0.49703 | -1.65615 | 2.47989  |
| H  | 0.32787  | -1.02469 | 2.82855  | H  | 0.34418  | -1.05252 | 2.81024  |
| H  | -1.40071 | -0.99678 | 2.44364  | H  | -1.38403 | -1.02695 | 2.42542  |
| H  | -0.68345 | -2.39063 | 3.25900  | H  | -0.66514 | -2.42042 | 3.23956  |
| C  | -0.68301 | -2.39898 | -2.07776 | C  | -0.65487 | -2.42742 | -2.09433 |
| H  | -0.82511 | -3.43092 | -1.77307 | H  | -0.79394 | -3.46057 | -1.79200 |
| H  | -1.63073 | -1.87498 | -1.97857 | H  | -1.60403 | -1.90601 | -1.99395 |
| H  | -0.41388 | -2.40548 | -3.13489 | H  | -0.38389 | -2.43107 | -3.15107 |
| C  | 0.79876  | -0.41311 | -2.07969 | C  | 0.82201  | -0.43790 | -2.09021 |
| H  | -0.06194 | 0.24617  | -2.18234 | H  | -0.04034 | 0.21863  | -2.19578 |
| H  | 1.60304  | 0.12582  | -1.59249 | H  | 1.62287  | 0.10406  | -1.60024 |
| H  | 1.14557  | -0.69475 | -3.07467 | H  | 1.17319  | -0.71847 | -3.08398 |
| C  | 3.66584  | 1.22775  | -0.41880 | C  | 3.65401  | 1.25378  | -0.40985 |
| C  | 3.20659  | 0.34767  | 0.57622  | C  | 3.18736  | 0.37723  | 0.58475  |
| C  | 1.11891  | 1.71649  | 0.87716  | C  | 1.09028  | 1.73866  | 0.85326  |
| C  | 1.55828  | 2.62425  | -0.10840 | C  | 1.53925  | 2.64452  | -0.12890 |
| C  | 2.79152  | 2.34470  | -0.92588 | C  | 2.77756  | 2.35975  | -0.93688 |
| H  | 3.38853  | 3.25887  | -1.00494 | H  | 3.37068  | 3.27519  | -1.02794 |
| H  | 2.48726  | 2.12023  | -1.95706 | H  | 2.47784  | 2.11754  | -1.96552 |
| H  | 1.75668  | 0.09826  | 2.13353  | H  | 1.72286  | 0.13768  | 2.12906  |
| C  | 5.34034  | -0.80835 | 0.53221  | C  | 5.32871  | -0.76503 | 0.57694  |
| H  | 5.99192  | -1.58696 | 0.91037  | H  | 5.98023  | -1.53690 | 0.96878  |
| C  | 4.06668  | -0.65741 | 1.04825  | C  | 4.04691  | -0.61968 | 1.07435  |
| H  | 3.72576  | -1.31688 | 1.83823  | H  | 3.69910  | -1.27657 | 1.86347  |

|                                |    |          |          |          |                                |    |          |          |          |
|--------------------------------|----|----------|----------|----------|--------------------------------|----|----------|----------|----------|
|                                | C  | 5.78473  | 0.05388  | -0.47034 |                                | C  | 5.78110  | 0.09407  | -0.42481 |
|                                | H  | 6.78188  | -0.05503 | -0.87994 |                                | H  | 6.78456  | -0.01062 | -0.81987 |
|                                | C  | 4.95233  | 1.06445  | -0.92982 |                                | C  | 4.94838  | 1.09613  | -0.90236 |
|                                | H  | 5.30865  | 1.74852  | -1.69287 |                                | H  | 5.31062  | 1.77765  | -1.66488 |
|                                | C  | -0.74287 | 3.18237  | 1.39538  |                                | C  | -0.77573 | 3.20512  | 1.35358  |
|                                | H  | -1.64652 | 3.38122  | 1.95547  |                                | H  | -1.68507 | 3.40446  | 1.90443  |
|                                | C  | -0.03850 | 2.01769  | 1.61985  |                                | C  | -0.07556 | 2.03942  | 1.58354  |
|                                | H  | -0.39311 | 1.31455  | 2.36069  |                                | H  | -0.43895 | 1.33377  | 2.31804  |
|                                | C  | -0.30203 | 4.07696  | 0.42161  |                                | C  | -0.32444 | 4.09947  | 0.38386  |
|                                | H  | -0.85504 | 4.98907  | 0.23305  |                                | H  | -0.87486 | 5.01197  | 0.18977  |
|                                | C  | 0.84145  | 3.79695  | -0.31546 |                                | C  | 0.82516  | 3.81762  | -0.34325 |
|                                | H  | 1.18235  | 4.50174  | -1.06639 |                                | H  | 1.17331  | 4.52187  | -1.09138 |
| <b>TS1a-O</b> (quintet)        | C  | 4.37541  | 1.62660  | 0.17664  | <b>TS1a-O</b> (septet)         | C  | 4.47639  | 1.40940  | 0.11660  |
| B3LYP+IDSCRF-D3a/TZP-DKH(-dfg) | C  | 3.31755  | 2.06734  | -0.82777 | B3LYP+IDSCRF-D3a/TZP-DKH(-dfg) | C  | 3.43561  | 1.91518  | -0.87501 |
|                                | C  | 2.25342  | 0.99160  | -1.10979 |                                | C  | 2.30650  | 0.90515  | -1.14811 |
|                                | N  | 1.75979  | 0.50767  | 0.21683  |                                | N  | 1.79744  | 0.45033  | 0.18136  |
|                                | C  | 2.65165  | 0.14427  | 1.35860  |                                | C  | 2.68183  | 0.01700  | 1.30260  |
|                                | C  | 3.69807  | 1.26540  | 1.49313  |                                | C  | 3.79142  | 1.07669  | 1.43658  |
|                                | H  | 5.09214  | 2.43554  | 0.33953  |                                | H  | 5.23863  | 2.17604  | 0.27804  |
|                                | H  | 4.95018  | 0.78089  | -0.20946 |                                | H  | 4.99968  | 0.53571  | -0.28038 |
|                                | H  | 3.77104  | 2.34607  | -1.78174 |                                | H  | 3.89471  | 2.17026  | -1.83308 |
|                                | H  | 2.81312  | 2.95766  | -0.44015 |                                | H  | 2.98896  | 2.83225  | -0.47900 |
|                                | H  | 4.42972  | 0.95157  | 2.24119  |                                | H  | 4.51076  | 0.71676  | 2.17587  |
|                                | H  | 3.20121  | 2.15768  | 1.88697  |                                | H  | 3.34838  | 1.99215  | 1.84123  |
|                                | O  | 0.65407  | -0.29785 | 0.12314  |                                | O  | 0.65321  | -0.31460 | 0.07178  |
|                                | Fe | 0.22453  | -2.19222 | -0.39813 |                                | Fe | 0.10362  | -2.19215 | -0.35404 |
|                                | Cl | -1.36475 | -1.78538 | -1.87356 |                                | Cl | -1.58713 | -1.83227 | -1.71184 |
|                                | Cl | 1.81995  | -3.44634 | -1.25269 |                                | Cl | 1.58058  | -3.52258 | -1.29780 |
|                                | Cl | -0.40637 | -3.00254 | 1.56069  |                                | Cl | -0.46905 | -2.99892 | 1.62048  |
|                                | C  | -1.37502 | 0.95910  | 1.18263  |                                | C  | -1.32034 | 1.01059  | 1.17190  |
|                                | H  | -0.33008 | 0.28706  | 0.56485  |                                | H  | -0.33292 | 0.31488  | 0.55071  |
|                                | C  | 3.32901  | -1.22584 | 1.19242  |                                | C  | 3.28331  | -1.38571 | 1.11635  |
|                                | H  | 3.91102  | -1.44412 | 2.09005  |                                | H  | 3.87296  | -1.63970 | 1.99957  |



|   |          |          |          |   |          |          |          |
|---|----------|----------|----------|---|----------|----------|----------|
| H | 2.59508  | -2.02184 | 1.08222  | H | 2.50735  | -2.14289 | 1.02125  |
| H | 4.00059  | -1.26726 | 0.33926  | H | 3.93233  | -1.45886 | 0.24805  |
| C | 1.79998  | 0.10326  | 2.63250  | C | 1.84612  | 0.01046  | 2.58780  |
| H | 1.29099  | 1.05389  | 2.79103  | H | 1.39370  | 0.98656  | 2.76132  |
| H | 1.06181  | -0.69700 | 2.59204  | H | 1.06244  | -0.74497 | 2.54924  |
| H | 2.44967  | -0.07918 | 3.49009  | H | 2.49362  | -0.21873 | 3.43595  |
| C | 2.82145  | -0.13243 | -1.99021 | C | 2.79485  | -0.24460 | -2.04298 |
| H | 3.67710  | -0.63438 | -1.54705 | H | 3.64277  | -0.78143 | -1.62590 |
| H | 2.06569  | -0.88571 | -2.20167 | H | 1.99926  | -0.96467 | -2.22280 |
| H | 3.13732  | 0.29200  | -2.94525 | H | 3.09751  | 0.16050  | -3.01067 |
| C | 1.08143  | 1.63391  | -1.85575 | C | 1.16608  | 1.62530  | -1.87368 |
| H | 0.29335  | 0.90685  | -2.05071 | H | 0.33697  | 0.94717  | -2.07493 |
| H | 0.66909  | 2.46631  | -1.29148 | H | 0.80253  | 2.46638  | -1.28850 |
| H | 1.43656  | 2.01138  | -2.81623 | H | 1.53317  | 2.00283  | -2.82980 |
| C | -1.93775 | 2.65982  | -0.52061 | C | -1.80252 | 2.78958  | -0.48148 |
| C | -1.21173 | 2.29578  | 0.63372  | C | -1.09113 | 2.35446  | 0.65649  |
| C | -2.59130 | 0.22300  | 0.87059  | C | -2.57525 | 0.34825  | 0.84376  |
| C | -3.34151 | 0.57645  | -0.26869 | C | -3.31041 | 0.76955  | -0.28277 |
| C | -2.80712 | 1.63335  | -1.19295 | C | -2.74037 | 1.83796  | -1.17333 |
| H | -3.61817 | 2.11594  | -1.74271 | H | -3.53917 | 2.38679  | -1.67763 |
| H | -2.19546 | 1.11705  | -1.94945 | H | -2.17750 | 1.33063  | -1.97146 |
| H | -0.99582 | 0.81689  | 2.19264  | H | -0.96000 | 0.83295  | 2.18410  |
| C | -0.19007 | 4.49344  | 0.67994  | C | 0.05475  | 4.48925  | 0.74922  |
| H | 0.48233  | 5.20593  | 1.14241  | H | 0.76961  | 5.14999  | 1.22474  |
| C | -0.33402 | 3.22578  | 1.21636  | C | -0.15946 | 3.21937  | 1.25531  |
| H | 0.21901  | 2.94771  | 2.10449  | H | 0.38336  | 2.88758  | 2.13094  |
| C | -0.92251 | 4.85364  | -0.45013 | C | -0.66044 | 4.91871  | -0.36776 |
| H | -0.82075 | 5.84778  | -0.86890 | H | -0.50258 | 5.91463  | -0.76433 |
| C | -1.79009 | 3.93891  | -1.03986 | C | -1.58306 | 4.07005  | -0.97182 |
| H | -2.35667 | 4.22556  | -1.91917 | H | -2.13790 | 4.41014  | -1.83959 |
| C | -4.21465 | -1.48965 | 1.40521  | C | -4.26117 | -1.32277 | 1.31490  |
| H | -4.55221 | -2.29471 | 2.04635  | H | -4.62873 | -2.13796 | 1.92611  |
| C | -3.04035 | -0.82067 | 1.69497  | C | -3.06607 | -0.70583 | 1.63103  |

|                                        |                              |                                        |                               |
|----------------------------------------|------------------------------|----------------------------------------|-------------------------------|
|                                        | H -2.45244 -1.10240 2.55878  |                                        | H -2.49163 -1.03817 2.48584   |
|                                        | C -4.96027 -1.12654 0.28438  |                                        | C -4.99157 -0.89294 0.20697   |
|                                        | H -5.88234 -1.64738 0.05469  |                                        | H -5.93073 -1.37224 -0.04283  |
|                                        | C -4.52149 -0.09896 -0.54394 |                                        | C -4.51502 0.14897 -0.58104   |
|                                        | H -5.10238 0.17442 -1.41799  |                                        | H -5.08461 0.47545 -1.44437   |
| <b>P2 (sextet)</b>                     | Fe 1.66240 -0.00007 -0.02427 | <b>P2-O (sextet)</b>                   | Fe -1.70545 0.00000 0.03520   |
| B3LYP+IDSCRF-<br>D3a/TZP-DKH(-<br>dfg) | Cl 2.69097 1.83475 -0.71730  | B3LYP+IDSCRF-<br>D3a/TZP-DKH(-<br>dfg) | Cl -2.61752 -1.81077 -0.79760 |
|                                        | Cl 1.55362 -0.00001 2.19342  |                                        | Cl -1.67885 0.00001 2.22032   |
|                                        | O 0.00239 -0.00013 -0.93325  |                                        | O 0.06795 0.00019 -1.01961    |
|                                        | N -1.37787 -0.00004 -0.89046 |                                        | N 1.55760 -0.00006 -0.95259   |
|                                        | C -1.91248 -1.34264 -0.28444 |                                        | C 1.94765 1.29393 -0.28248    |
|                                        | C -1.72522 -1.26504 1.23036  |                                        | C 1.62620 1.26543 1.21993     |
|                                        | H -2.18789 -2.15670 1.66019  |                                        | H 2.05463 2.15665 1.68598     |
|                                        | H -0.66094 -1.32421 1.45740  |                                        | H 0.54522 1.34693 1.35209     |
|                                        | C -2.30432 0.00010 1.86607   |                                        | C 2.12120 0.00005 1.92383     |
|                                        | H -2.06359 0.00014 2.93074   |                                        | H 1.76587 0.00014 2.95668     |
|                                        | H -3.39574 0.00012 1.80241   |                                        | H 3.21329 -0.00001 1.97918    |
|                                        | C -3.37456 -1.55250 -0.69530 |                                        | C 3.44697 1.53798 -0.53552    |
|                                        | H -4.08159 -0.96446 -0.12085 |                                        | H 4.09802 0.95801 0.11000     |
|                                        | H -3.61610 -2.60211 -0.52802 |                                        | H 3.65691 2.59015 -0.33990    |
|                                        | H -3.53315 -1.35138 -1.75763 |                                        | H 3.70545 1.32648 -1.57339    |
|                                        | C -1.07837 -2.46820 -0.89626 |                                        | C 1.19519 2.43920 -0.97210    |
|                                        | H -1.17876 -2.48940 -1.98457 |                                        | H 1.39033 2.43457 -2.04717    |
|                                        | H -1.45493 -3.41509 -0.50701 |                                        | H 1.54951 3.38852 -0.56816    |
|                                        | H -0.02403 -2.39007 -0.65177 |                                        | H 0.12117 2.39232 -0.81351    |
|                                        | C -1.91240 1.34263 -0.28456  |                                        | C 1.94744 -1.29397 -0.28235   |
|                                        | C -1.72518 1.26516 1.23025   |                                        | C 1.62604 -1.26534 1.22008    |
|                                        | H -2.18781 2.15689 1.66000   |                                        | H 2.05444 -2.15656 1.68617    |
|                                        | H -0.66090 1.32432 1.45729   |                                        | H 0.54507 -1.34675 1.35227    |
|                                        | C -3.37445 1.55252 -0.69549  |                                        | C 3.44675 -1.53823 -0.53540   |
|                                        | H -4.08154 0.96465 -0.12097  |                                        | H 4.09788 -0.95821 0.11000    |
|                                        | H -3.61590 2.60219 -0.52839  |                                        | H 3.65656 -2.59039 -0.33963   |
|                                        | H -3.53302 1.35125 -1.75780  |                                        | H 3.70517 -1.32690 -1.57332   |

|                                                                   |                                                                                                                                                                                                                                                                                                                                                                                                                                                                                                                                                                                                                                                                                                                                                                                                                                                                 |                                                                    |                                                                                                                                                                                                                                                                                                                                                                                                                                                                                                                                                                                                                                                                                                                                                        |
|-------------------------------------------------------------------|-----------------------------------------------------------------------------------------------------------------------------------------------------------------------------------------------------------------------------------------------------------------------------------------------------------------------------------------------------------------------------------------------------------------------------------------------------------------------------------------------------------------------------------------------------------------------------------------------------------------------------------------------------------------------------------------------------------------------------------------------------------------------------------------------------------------------------------------------------------------|--------------------------------------------------------------------|--------------------------------------------------------------------------------------------------------------------------------------------------------------------------------------------------------------------------------------------------------------------------------------------------------------------------------------------------------------------------------------------------------------------------------------------------------------------------------------------------------------------------------------------------------------------------------------------------------------------------------------------------------------------------------------------------------------------------------------------------------|
|                                                                   | C -1.07823 2.46807 -0.89648<br>H -1.17867 2.48921 -1.98479<br>H -1.45470 3.41501 -0.50728<br>H -0.02389 2.38986 -0.65201<br>Cl 2.69120 -1.83460 -0.71753<br>H -1.66040 -0.00008 -1.87761                                                                                                                                                                                                                                                                                                                                                                                                                                                                                                                                                                                                                                                                        |                                                                    | C 1.19489 -2.43929 -0.97184<br>H 1.39019 -2.43495 -2.04689<br>H 1.54898 -3.38856 -0.56762<br>H 0.12085 -2.39220 -0.81342<br>Cl -2.61759 1.81084 -0.79735<br>H -0.10141 -0.00043 -1.97565                                                                                                                                                                                                                                                                                                                                                                                                                                                                                                                                                               |
| <b>TS2 (sextet)</b><br><br>B3LYP+IDSCRF-<br>D3a/TZP-DKH(-<br>dfg) | C 1.44649 -3.75567 -0.26700<br>C 1.64069 -2.57155 -1.21206<br>C 0.40307 -1.66657 -1.32849<br>N -0.00621 -1.29979 0.08482<br>C -0.25429 -2.40632 1.09412<br>C 1.01463 -3.27253 1.11614<br>H 2.38065 -4.31723 -0.18519<br>H 0.70986 -4.45268 -0.67290<br>H 1.89786 -2.91618 -2.21672<br>H 2.48446 -1.97129 -0.86073<br>H 0.83343 -4.11789 1.78452<br>H 1.82798 -2.69090 1.56025<br>O -1.01940 -0.38827 0.08623<br>Fe -2.71229 0.28125 -0.17810<br>Cl -2.47482 1.94039 -1.65610<br>Cl -4.16504 -1.22205 -0.95831<br>Cl -3.37971 0.99060 1.84561<br>C 1.85361 0.54491 1.19086<br>H 1.15641 -0.33317 0.65419<br>C -1.50693 -3.23769 0.77820<br>H -1.76728 -3.82126 1.66291<br>H -2.35268 -2.59729 0.53796<br>H -1.36481 -3.93562 -0.04104<br>C -0.47385 -1.75121 2.46280<br>H 0.38725 -1.16870 2.78349<br>H -1.34994 -1.10390 2.45195<br>H -0.63248 -2.53407 3.20586 | <b>P1a (singlet)</b><br><br>B3LYP+IDSCRF-<br>D3a/TZP-DKH(-<br>dfg) | C 0.00000 1.39999 -0.00007<br>C -1.21877 -0.72020 -0.00004<br>C -1.21877 0.72020 -0.00004<br>C 1.21877 0.72020 -0.00004<br>C 1.21877 -0.72020 -0.00004<br>C 0.00000 -1.39999 -0.00007<br>H 0.00000 -2.48542 -0.00013<br>H 0.00000 2.48542 -0.00013<br>C -3.64660 0.71112 0.00007<br>H -4.59095 1.24285 0.00011<br>C -2.47088 1.40285 0.00000<br>H -2.47057 2.48750 -0.00002<br>C -3.64660 -0.71112 0.00007<br>H -4.59095 -1.24285 0.00011<br>C -2.47088 -1.40285 0.00000<br>H -2.47057 -2.48750 -0.00002<br>C 3.64660 0.71112 0.00007<br>H 4.59095 1.24285 0.00011<br>C 2.47088 1.40285 0.00000<br>H 2.47057 2.48750 -0.00002<br>C 3.64660 -0.71112 0.00007<br>H 4.59095 -1.24285 0.00011<br>C 2.47088 -1.40285 0.00000<br>H 2.47057 -2.48750 -0.00002 |

|   |          |          |          |
|---|----------|----------|----------|
| C | -0.72474 | -2.33756 | -2.12802 |
| H | -0.87442 | -3.38066 | -1.86579 |
| H | -1.66852 | -1.81300 | -1.99506 |
| H | -0.46676 | -2.30058 | -3.18766 |
| C | 0.77006  | -0.36531 | -2.05000 |
| H | -0.08934 | 0.29914  | -2.12667 |
| H | 1.57501  | 0.16221  | -1.54641 |
| H | 1.11510  | -0.60696 | -3.05659 |
| C | 3.68235  | 1.26378  | -0.33697 |
| C | 3.20506  | 0.38009  | 0.67290  |
| C | 1.14665  | 1.78225  | 0.89040  |
| C | 1.65857  | 2.65484  | -0.12379 |
| C | 2.88771  | 2.36154  | -0.71327 |
| H | 3.26745  | 3.03202  | -1.47877 |
| H | 1.74335  | 0.22091  | 2.22490  |
| C | 5.28347  | -0.84485 | 0.53462  |
| H | 5.91736  | -1.65257 | 0.88142  |
| C | 4.03868  | -0.66474 | 1.09786  |
| H | 3.69937  | -1.32849 | 1.88403  |
| C | 5.74651  | 0.00903  | -0.48650 |
| H | 6.72407  | -0.15437 | -0.92285 |
| C | 4.96070  | 1.04676  | -0.91345 |
| H | 5.30639  | 1.71887  | -1.69072 |
| C | -0.72375 | 3.27376  | 1.17829  |
| H | -1.66287 | 3.50274  | 1.66477  |
| C | -0.05011 | 2.12829  | 1.53103  |
| H | -0.47004 | 1.46813  | 2.27734  |
| C | -0.23461 | 4.12830  | 0.16532  |
| H | -0.79886 | 5.01113  | -0.10664 |
| C | 0.93088  | 3.82635  | -0.47667 |
| H | 1.31776  | 4.46645  | -1.26115 |

|                                                              |         |          |          |          |                                                            |          |          |          |          |
|--------------------------------------------------------------|---------|----------|----------|----------|------------------------------------------------------------|----------|----------|----------|----------|
| <b>INT1b'</b> (singlet)<br><br>B3LYP+IDSCRF-D3/TZP-DKH(-dfg) | C       | 1.35516  | 1.33154  | 0.00003  | <b>R1b</b> (singlet)<br><br>B3LYP+IDSCRF-D3a/TZP-DKH(-dfg) | C        | 1.39930  | -1.32432 | -0.05341 |
|                                                              | C       | -0.01310 | 1.08147  | 0.00012  |                                                            | C        | 0.03923  | -1.07150 | -0.18395 |
|                                                              | C       | 2.26144  | 0.27568  | -0.00007 |                                                            | C        | 2.29589  | -0.27064 | 0.10256  |
|                                                              | H       | -0.72419 | 1.89816  | 0.00018  |                                                            | H        | -0.66144 | -1.88979 | -0.30043 |
|                                                              | H       | 3.32704  | 0.47269  | -0.00014 |                                                            | H        | 3.35658  | -0.46831 | 0.20447  |
|                                                              | C       | -0.48487 | -0.22760 | 0.00008  |                                                            | C        | -0.44445 | 0.23766  | -0.15587 |
|                                                              | C       | 1.79360  | -1.03497 | -0.00011 |                                                            | C        | 1.82242  | 1.03609  | 0.13238  |
|                                                              | H       | 2.49358  | -1.86244 | -0.00021 |                                                            | H        | 2.51301  | 1.86170  | 0.26057  |
|                                                              | C       | 0.42649  | -1.28383 | -0.00002 |                                                            | C        | 0.45914  | 1.28625  | 0.00840  |
|                                                              | H       | 0.06511  | -2.30780 | -0.00006 |                                                            | H        | 0.09446  | 2.30776  | 0.04291  |
|                                                              | H       | 1.71481  | 2.35408  | 0.00006  |                                                            | H        | 1.76209  | -2.34565 | -0.07521 |
|                                                              | C       | -1.96729 | -0.52714 | 0.00024  |                                                            | C        | -1.92176 | 0.51054  | -0.32213 |
|                                                              | H       | -2.23070 | -1.18181 | 0.85942  |                                                            | H        | -2.19913 | 0.43343  | -1.37706 |
|                                                              | H       | -2.23071 | -1.18292 | -0.85808 |                                                            | H        | -2.14716 | 1.53585  | -0.00375 |
|                                                              | O       | -2.83044 | 0.51489  | -0.00035 |                                                            | O        | -2.76070 | -0.42892 | 0.34891  |
|                                                              |         | H        |          |          |                                                            | H        | -2.53135 | -0.42812 | 1.28927  |
| <b>TS1b</b> (quintet)<br><br>B3LYP+IDSCRF-D3a/TZP-DKH(-dfg)  | C       | -2.13899 | 2.95212  | 0.07006  | <b>TS1b</b> (septet)<br><br>B3LYP+IDSCRF-D3a/TZP-DKH(-dfg) | C        | -2.13690 | 2.95344  | 0.06843  |
|                                                              | C       | -1.53460 | 2.34598  | -1.19190 |                                                            | C        | -1.53288 | 2.34576  | -1.19294 |
|                                                              | C       | -0.10046 | 1.82180  | -1.02519 |                                                            | C        | -0.09929 | 1.82017  | -1.02561 |
|                                                              | N       | -0.08093 | 0.90185  | 0.21564  |                                                            | N        | -0.08138 | 0.90075  | 0.21558  |
|                                                              | C       | -0.71103 | 1.41405  | 1.53257  |                                                            | C        | -0.71124 | 1.41438  | 1.53207  |
|                                                              | C       | -2.11615 | 1.93373  | 1.20600  |                                                            | C        | -2.11565 | 1.93562  | 1.20490  |
|                                                              | H       | -3.16981 | 3.25227  | -0.13120 |                                                            | H        | -3.16727 | 3.25479  | -0.13332 |
|                                                              | H       | -1.60774 | 3.86308  | 0.35460  |                                                            | H        | -1.60459 | 3.86388  | 0.35268  |
|                                                              | H       | -1.51574 | 3.07635  | -2.00430 |                                                            | H        | -1.51321 | 3.07538  | -2.00600 |
|                                                              | H       | -2.17338 | 1.52564  | -1.52639 |                                                            | H        | -2.17242 | 1.52574  | -1.52676 |
|                                                              | H       | -2.52297 | 2.36498  | 2.12373  |                                                            | H        | -2.52203 | 2.36796  | 2.12231  |
|                                                              | H       | -2.75909 | 1.08882  | 0.94649  |                                                            | H        | -2.75964 | 1.09137  | 0.94578  |
|                                                              | O       | 1.13867  | 0.41455  | 0.48011  |                                                            | O        | 1.13713  | 0.41115  | 0.48109  |
|                                                              | Fe      | 2.61538  | -0.60195 | -0.02681 |                                                            | Fe       | 2.61576  | -0.60211 | -0.02676 |
|                                                              | Cl      | 4.00958  | 0.67520  | -1.18055 |                                                            | Cl       | 4.00717  | 0.67392  | -1.18507 |
|                                                              | Cl      | 3.46872  | -1.34476 | 1.86740  |                                                            | Cl       | 3.47368  | -1.33845 | 1.86791  |
| Cl                                                           | 1.87345 | -2.31201 | -1.29498 | Cl       | 1.87374                                                    | -2.31582 | -1.29019 |          |          |

|   |          |          |          |   |          |          |          |
|---|----------|----------|----------|---|----------|----------|----------|
| C | -4.86897 | -1.64255 | 0.84593  | C | -4.87075 | -1.64136 | 0.84628  |
| C | -3.48942 | -1.77780 | 0.78951  | C | -3.49126 | -1.77716 | 0.78983  |
| C | -5.56734 | -1.09362 | -0.22659 | C | -5.56892 | -1.09209 | -0.22620 |
| H | -2.95151 | -2.22262 | 1.61605  | H | -2.95351 | -2.22226 | 1.61632  |
| H | -6.64463 | -0.98949 | -0.17784 | H | -6.64617 | -0.98753 | -0.17743 |
| C | -2.78612 | -1.36383 | -0.34889 | C | -2.78781 | -1.36344 | -0.34857 |
| C | -4.87791 | -0.69366 | -1.36894 | C | -4.87934 | -0.69235 | -1.36854 |
| H | -5.41839 | -0.28692 | -2.21535 | H | -5.41966 | -0.28533 | -2.21491 |
| C | -3.49977 | -0.82872 | -1.43059 | C | -3.50125 | -0.82794 | -1.43022 |
| H | -2.97093 | -0.53709 | -2.33101 | H | -2.97231 | -0.53645 | -2.33062 |
| H | -5.40458 | -1.97258 | 1.72819  | H | -5.40648 | -1.97122 | 1.72854  |
| C | -1.32200 | -1.44478 | -0.42630 | C | -1.32373 | -1.44484 | -0.42591 |
| H | -0.91176 | -1.53936 | -1.43292 | H | -0.91337 | -1.54002 | -1.43244 |
| H | -0.84686 | -0.19793 | -0.14045 | H | -0.84844 | -0.19806 | -0.14044 |
| O | -0.72938 | -2.27335 | 0.48366  | O | -0.73129 | -2.27291 | 0.48453  |
| H | 0.17912  | -2.46484 | 0.17512  | H | 0.17744  | -2.46410 | 0.17638  |
| C | 0.17415  | 2.49182  | 2.17340  | C | 0.17510  | 2.49139  | 2.17260  |
| H | -0.15139 | 2.61964  | 3.20662  | H | -0.15077 | 2.62036  | 3.20556  |
| H | 1.21635  | 2.17781  | 2.18285  | H | 1.21686  | 2.17594  | 2.18278  |
| H | 0.10053  | 3.45947  | 1.68748  | H | 0.10307  | 3.45881  | 1.68598  |
| C | -0.78141 | 0.22886  | 2.49707  | C | -0.78351 | 0.22976  | 2.49716  |
| H | -1.38169 | -0.58662 | 2.10845  | H | -1.38399 | -0.58550 | 2.10838  |
| H | 0.21349  | -0.15073 | 2.72330  | H | 0.21086  | -0.15043 | 2.72467  |
| H | -1.24160 | 0.57267  | 3.42448  | H | -1.24443 | 0.57448  | 3.42387  |
| C | 0.92653  | 2.95112  | -0.87306 | C | 0.92884  | 2.94845  | -0.87354 |
| H | 0.61246  | 3.72640  | -0.18174 | H | 0.61466  | 3.72497  | -0.18368 |
| H | 1.89057  | 2.55633  | -0.55846 | H | 1.89199  | 2.55299  | -0.55710 |
| H | 1.05964  | 3.41690  | -1.85043 | H | 1.06397  | 3.41279  | -1.85131 |
| C | 0.28731  | 0.99298  | -2.25175 | C | 0.28765  | 0.99046  | -2.25185 |
| H | 1.30390  | 0.61266  | -2.18733 | H | 1.30362  | 0.60861  | -2.18722 |
| H | -0.39117 | 0.16182  | -2.42607 | H | -0.39211 | 0.16035  | -2.42616 |
| H | 0.23695  | 1.64317  | -3.12613 | H | 0.23852  | 1.64052  | -3.12639 |

|                                                                       |          |          |          |          |                                                                      |          |          |          |          |
|-----------------------------------------------------------------------|----------|----------|----------|----------|----------------------------------------------------------------------|----------|----------|----------|----------|
| <b>TS1b-O</b> (quintet)<br><br>B3LYP+IDSCRF-<br>D3a/TZP-DKH(-<br>dfg) | C        | 0.85406  | 3.99697  | -0.26801 | <b>TS1b-O</b> (septet)<br><br>B3LYP+IDSCRF-<br>D3a/TZP-DKH(-<br>dfg) | C        | 0.83695  | 4.04517  | -0.26683 |
|                                                                       | C        | 0.75187  | 3.40991  | 1.13527  |                                                                      | C        | 0.72090  | 3.46647  | 1.13895  |
|                                                                       | C        | -0.17300 | 2.18266  | 1.21575  |                                                                      | C        | -0.18312 | 2.22260  | 1.21267  |
|                                                                       | N        | 0.23729  | 1.25388  | 0.12210  |                                                                      | N        | 0.27461  | 1.29210  | 0.14105  |
|                                                                       | C        | 0.51008  | 1.66727  | -1.28611 |                                                                      | C        | 0.52804  | 1.70552  | -1.26970 |
|                                                                       | C        | 1.38252  | 2.93415  | -1.22467 |                                                                      | C        | 1.38839  | 2.98138  | -1.20965 |
|                                                                       | H        | 1.52949  | 4.85610  | -0.26078 |                                                                      | H        | 1.50313  | 4.91161  | -0.25612 |
|                                                                       | H        | -0.11618 | 4.37335  | -0.60199 |                                                                      | H        | -0.13245 | 4.40924  | -0.61675 |
|                                                                       | H        | 0.38583  | 4.15219  | 1.84831  |                                                                      | H        | 0.33026  | 4.20756  | 1.84033  |
|                                                                       | H        | 1.75255  | 3.11431  | 1.46623  |                                                                      | H        | 1.72069  | 3.19037  | 1.48868  |
|                                                                       | H        | 1.47111  | 3.32718  | -2.24002 |                                                                      | H        | 1.48477  | 3.36821  | -2.22682 |
|                                                                       | H        | 2.38809  | 2.64341  | -0.90563 |                                                                      | H        | 2.39283  | 2.70274  | -0.87670 |
|                                                                       | O        | -0.35535 | 0.02663  | 0.21662  |                                                                      | O        | -0.35818 | 0.06532  | 0.22228  |
|                                                                       | Fe       | -2.10207 | -0.88331 | -0.17989 |                                                                      | Fe       | -2.05736 | -0.87758 | -0.18551 |
|                                                                       | Cl       | -3.84965 | 0.36487  | -0.62332 |                                                                      | Cl       | -3.81137 | 0.31648  | -0.72198 |
|                                                                       | Cl       | -1.53945 | -2.18754 | -1.86197 |                                                                      | Cl       | -1.48460 | -2.26204 | -1.78770 |
|                                                                       | Cl       | -2.26269 | -1.95393 | 1.78914  |                                                                      | Cl       | -2.34158 | -1.93890 | 1.76010  |
|                                                                       | C        | 4.18946  | -1.93075 | -1.02931 |                                                                      | C        | 4.14707  | -1.98601 | -1.02581 |
|                                                                       | C        | 2.97384  | -2.23545 | -0.44269 |                                                                      | C        | 2.93151  | -2.27068 | -0.42860 |
|                                                                       | C        | 4.96569  | -0.87943 | -0.54062 |                                                                      | C        | 4.94023  | -0.94143 | -0.55019 |
|                                                                       | H        | 2.36167  | -3.04043 | -0.82653 |                                                                      | H        | 2.30764  | -3.07205 | -0.80088 |
|                                                                       | H        | 5.91453  | -0.64356 | -1.00744 |                                                                      | H        | 5.88928  | -0.72155 | -1.02436 |
|                                                                       | C        | 2.51908  | -1.49471 | 0.66195  |                                                                      | C        | 2.49194  | -1.51486 | 0.67195  |
|                                                                       | C        | 4.52143  | -0.13573 | 0.54996  |                                                                      | C        | 4.51133  | -0.18307 | 0.53712  |
|                                                                       | H        | 5.12645  | 0.67554  | 0.93666  |                                                                      | H        | 5.12876  | 0.62389  | 0.91323  |
|                                                                       | C        | 3.30902  | -0.43813 | 1.14818  |                                                                      | C        | 3.29812  | -0.46347 | 1.14326  |
|                                                                       | H        | 2.97343  | 0.13169  | 2.00523  |                                                                      | H        | 2.97068  | 0.12190  | 1.99311  |
|                                                                       | H        | 4.53722  | -2.50989 | -1.87642 |                                                                      | H        | 4.48194  | -2.57628 | -1.87050 |
|                                                                       | C        | 1.22063  | -1.75206 | 1.25626  |                                                                      | C        | 1.19024  | -1.74800 | 1.27371  |
|                                                                       | H        | 1.06881  | -1.41323 | 2.28532  |                                                                      | H        | 1.05852  | -1.40237 | 2.30499  |
|                                                                       | H        | 0.44461  | -0.77258 | 0.67376  |                                                                      | H        | 0.43656  | -0.78523 | 0.69399  |
|                                                                       | O        | 0.64247  | -2.94495 | 0.93874  |                                                                      | O        | 0.61824  | -2.96141 | 0.99176  |
| H                                                                     | -0.25430 | -2.98080 | 1.32281  | H        | -0.27916                                                             | -2.98924 | 1.36937  |          |          |

|                      |   |          |          |          |                        |   |          |          |          |
|----------------------|---|----------|----------|----------|------------------------|---|----------|----------|----------|
|                      | C | -0.77779 | 1.91578  | -2.08822 |                        | C | -0.75551 | 1.94090  | -2.08196 |
|                      | H | -0.51482 | 2.14146  | -3.12334 |                        | H | -0.48793 | 2.16658  | -3.11601 |
|                      | H | -1.41406 | 1.03182  | -2.10240 |                        | H | -1.38244 | 1.05038  | -2.09984 |
|                      | H | -1.36397 | 2.74571  | -1.70153 |                        | H | -1.35472 | 2.76529  | -1.70383 |
|                      | C | 1.30473  | 0.54601  | -1.96378 |                        | C | 1.33575  | 0.59073  | -1.94367 |
|                      | H | 2.22008  | 0.33291  | -1.41414 |                        | H | 2.24756  | 0.38172  | -1.38643 |
|                      | H | 0.71682  | -0.36768 | -2.04156 |                        | H | 0.75496  | -0.32754 | -2.02366 |
|                      | H | 1.57376  | 0.86183  | -2.97334 |                        | H | 1.61019  | 0.90597  | -2.95215 |
|                      | C | -1.65055 | 2.59518  | 1.13699  |                        | C | -1.66626 | 2.60882  | 1.10912  |
|                      | H | -1.88244 | 3.16968  | 0.24375  |                        | H | -1.89341 | 3.18633  | 0.21662  |
|                      | H | -2.30328 | 1.72529  | 1.15335  |                        | H | -2.30294 | 1.72646  | 1.10805  |
|                      | H | -1.89567 | 3.20987  | 2.00542  |                        | H | -1.94129 | 3.21181  | 1.97686  |
|                      | C | 0.05379  | 1.46502  | 2.55148  |                        | C | 0.03657  | 1.52135  | 2.55879  |
|                      | H | -0.60817 | 0.60584  | 2.66032  |                        | H | -0.61529 | 0.65426  | 2.66658  |
|                      | H | 1.08740  | 1.13083  | 2.64330  |                        | H | 1.07308  | 1.19920  | 2.66285  |
|                      | H | -0.15220 | 2.15633  | 3.37004  |                        | H | -0.18733 | 2.21531  | 3.37067  |
| <b>P1b</b> (singlet) | C | -1.32792 | -1.32414 | -0.00007 | <b>INT1b</b> (doublet) | C | -1.34043 | -1.34200 | -0.00004 |
| B3LYP+IDSCRF-        | C | 0.03919  | -1.10204 | 0.00019  | B3LYP+IDSCRF-          | C | 0.01699  | -1.08030 | 0.00014  |
| D3a/TZP-DKH(-        | C | -2.21050 | -0.24328 | -0.00021 | D3a/TZP-DKH(-          | C | -2.27228 | -0.30131 | -0.00020 |
| dfg)                 | H | 0.74330  | -1.92515 | 0.00031  | dfg)                   | H | 0.73130  | -1.89259 | 0.00035  |
|                      | H | -3.27970 | -0.42116 | -0.00041 |                        | H | -3.33310 | -0.51662 | -0.00051 |
|                      | C | 0.53236  | 0.20701  | 0.00032  |                        | C | 0.49248  | 0.25834  | 0.00018  |
|                      | C | -1.72591 | 1.06070  | -0.00010 |                        | C | -1.82030 | 1.02275  | -0.00009 |
|                      | H | -2.41479 | 1.89688  | -0.00021 |                        | H | -2.53591 | 1.83642  | -0.00008 |
|                      | C | -0.35515 | 1.28521  | 0.00016  |                        | C | -0.46943 | 1.30434  | 0.00010  |
|                      | H | 0.03269  | 2.29872  | 0.00026  |                        | H | -0.13011 | 2.33412  | 0.00028  |
|                      | H | -1.71371 | -2.33672 | -0.00015 |                        | H | -1.68395 | -2.36990 | -0.00003 |
|                      | C | 1.98516  | 0.46440  | 0.00064  |                        | C | 1.85987  | 0.56647  | 0.00000  |
|                      | H | 2.26529  | 1.53885  | -0.00060 |                        | H | 2.22174  | 1.58683  | 0.00005  |
|                      | O | 2.84295  | -0.39233 | -0.00060 |                        | O | 2.78234  | -0.43599 | -0.00007 |
|                      |   |          |          |          |                        | H | 3.66989  | -0.06012 | -0.00010 |



|                                                               |   |          |          |          |                                                           |    |          |          |          |
|---------------------------------------------------------------|---|----------|----------|----------|-----------------------------------------------------------|----|----------|----------|----------|
| <b>INT1b'</b> (doublet)<br><br>B3LYP+IDSCRF-D3a/TZP-DKH(-dfg) | C | 1.35516  | 1.33154  | 0.00003  |                                                           |    |          |          |          |
|                                                               | C | -0.01310 | 1.08147  | 0.00012  |                                                           |    |          |          |          |
|                                                               | C | 2.26144  | 0.27568  | -0.00007 |                                                           |    |          |          |          |
|                                                               | H | -0.72419 | 1.89816  | 0.00018  |                                                           |    |          |          |          |
|                                                               | H | 3.32704  | 0.47269  | -0.00014 |                                                           |    |          |          |          |
|                                                               | C | -0.48487 | -0.22760 | 0.00008  |                                                           |    |          |          |          |
|                                                               | C | 1.79360  | -1.03497 | -0.00011 |                                                           |    |          |          |          |
|                                                               | H | 2.49358  | -1.86244 | -0.00021 |                                                           |    |          |          |          |
|                                                               | C | 0.42649  | -1.28383 | -0.00002 |                                                           |    |          |          |          |
|                                                               | H | 0.06511  | -2.30780 | -0.00006 |                                                           |    |          |          |          |
|                                                               | H | 1.71481  | 2.35408  | 0.00006  |                                                           |    |          |          |          |
|                                                               | C | -1.96729 | -0.52714 | 0.00024  |                                                           |    |          |          |          |
|                                                               | H | -2.23070 | -1.18181 | 0.85942  |                                                           |    |          |          |          |
|                                                               | H | -2.23071 | -1.18292 | -0.85808 |                                                           |    |          |          |          |
|                                                               | O | -2.83044 | 0.51489  | -0.00035 |                                                           |    |          |          |          |
| <b>R1a</b> (singlet)<br><br>B2GP-PLYP+IDSCRF/TZP-DKH(-dfg)    | C | 0.00000  | 1.41019  | 0.77308  | <b>R2</b> (quintet)<br><br>B2GP-PLYP+IDSCRF/TZP-DKH(-dfg) | C  | 4.02064  | 0.00013  | 0.22032  |
|                                                               | C | 1.24206  | -0.69876 | 0.30182  |                                                           | C  | 3.38052  | -1.23528 | -0.38866 |
|                                                               | C | 1.24209  | 0.69884  | 0.30176  |                                                           | C  | 1.87499  | -1.33503 | -0.13428 |
|                                                               | C | -1.24206 | 0.69884  | 0.30167  |                                                           | N  | 1.25343  | 0.00168  | -0.38909 |
|                                                               | C | -1.24207 | -0.69877 | 0.30185  |                                                           | C  | 1.87581  | 1.33919  | -0.13916 |
|                                                               | C | 0.00000  | -1.41002 | 0.77334  |                                                           | C  | 3.38273  | 1.23745  | -0.38701 |
|                                                               | H | -0.00001 | -2.44586 | 0.43755  |                                                           | H  | 5.08901  | -0.00058 | 0.01008  |
|                                                               | H | 0.00001  | -1.43489 | 1.86894  |                                                           | H  | 3.91738  | -0.00065 | 1.30538  |
|                                                               | H | 0.00002  | 2.44596  | 0.43707  |                                                           | H  | 3.83075  | -2.14765 | -0.00006 |
|                                                               | C | 3.49635  | 0.69462  | -0.56537 |                                                           | H  | 3.55248  | -1.22698 | -1.46664 |
|                                                               | H | 4.36590  | 1.23800  | -0.90652 |                                                           | H  | 3.83283  | 2.14855  | 0.00483  |
|                                                               | C | 2.36982  | 1.38625  | -0.13495 |                                                           | H  | 3.55860  | 1.23139  | -1.46438 |
|                                                               | H | 2.36376  | 2.46841  | -0.14363 |                                                           | O  | 0.01222  | 0.00179  | -0.70070 |
|                                                               | C | 3.49628  | -0.69473 | -0.56541 |                                                           | Fe | -1.79595 | -0.01382 | -0.03480 |
|                                                               | H | 4.36578  | -1.23818 | -0.90658 |                                                           | Cl | -2.70356 | -1.82250 | -0.85219 |
|                                                               | C | 2.36969  | -1.38626 | -0.13498 |                                                           | Cl | -1.65053 | -0.06641 | 2.14508  |
|                                                               | H | 2.36357  | -2.46842 | -0.14356 |                                                           | Cl | -2.67389 | 1.84328  | -0.77371 |
|                                                               | C | -3.49630 | 0.69459  | -0.56549 |                                                           | C  | 1.56858  | 1.75867  | 1.30187  |

|                                        |                               |                                        |                               |
|----------------------------------------|-------------------------------|----------------------------------------|-------------------------------|
|                                        | H -4.36582 1.23794 -0.90679   |                                        | H 1.92242 2.77875 1.43877     |
|                                        | C -2.36974 1.38624 -0.13518   |                                        | H 0.49940 1.73632 1.49526     |
|                                        | H -2.36365 2.46839 -0.14395   |                                        | H 2.06484 1.12481 2.03089     |
|                                        | C -3.49632 -0.69477 -0.56527  |                                        | C 1.25889 2.33864 -1.11144    |
|                                        | H -4.36585 -1.23821 -0.90637  |                                        | H 1.35874 1.99300 -2.13829    |
|                                        | C -2.36976 -1.38630 -0.13476  |                                        | H 0.20886 2.51710 -0.90205    |
|                                        | H -2.36369 -2.46846 -0.14320  |                                        | H 1.79831 3.27824 -1.00982    |
|                                        | H -0.00005 1.43531 1.86867    |                                        | C 1.57597 -1.74768 1.31039    |
|                                        |                               |                                        | H 2.07592 -1.10986 2.03351    |
|                                        |                               |                                        | H 0.50836 -1.72471 1.51030    |
|                                        |                               |                                        | H 1.93165 -2.76670 1.45012    |
|                                        |                               |                                        | C 1.25125 -2.33769 -1.09872   |
|                                        |                               |                                        | H 0.20189 -2.51276 -0.88337   |
|                                        |                               |                                        | H 1.34603 -1.99669 -2.12761   |
|                                        |                               |                                        | H 1.78831 -3.27828 -0.99556   |
| <b>TS1a</b> (quintet)                  | C 1.40817 -3.70278 -0.09056   | <b>TS1a-O</b> (quintet)                | C 3.98844 2.43865 0.25134     |
| B2GP-PLYP+<br>IDSCRF/TZP-<br>DKH(-dfg) | C 1.55280 -2.57102 -1.09824   | B2GP-PLYP+<br>IDSCRF/TZP-<br>DKH(-dfg) | C 2.88590 2.67805 -0.76521    |
|                                        | C 0.30163 -1.70058 -1.23119   |                                        | C 2.06389 1.42190 -1.07197    |
|                                        | N -0.08198 -1.25252 0.18086   |                                        | N 1.62273 0.87612 0.24284     |
|                                        | C -0.25927 -2.31988 1.26097   |                                        | C 2.55782 0.65072 1.37781     |
|                                        | C 1.02039 -3.15424 1.27566    |                                        | C 3.36739 1.94210 1.54520     |
|                                        | H 2.35359 -4.23807 -0.01078   |                                        | H 4.53139 3.36553 0.43499     |
|                                        | H 0.67268 -4.43077 -0.43114   |                                        | H 4.71742 1.72225 -0.12851    |
|                                        | H 1.77484 -2.96426 -2.09035   |                                        | H 3.29034 3.04615 -1.70823    |
|                                        | H 2.39602 -1.94084 -0.81303   |                                        | H 2.20936 3.44334 -0.37953    |
|                                        | H 0.87254 -3.96269 1.99154    |                                        | H 4.12740 1.75984 2.30503     |
|                                        | H 1.83571 -2.54002 1.65915    |                                        | H 2.70129 2.71623 1.93187     |
|                                        | O -1.09667 -0.37567 0.18428   |                                        | O 0.71629 -0.16740 0.10198    |
|                                        | Fe -2.77369 0.37314 -0.05846  |                                        | Fe 0.64789 -2.06810 -0.44847  |
|                                        | Cl -2.53601 1.97482 -1.54970  |                                        | Cl -0.94136 -1.96289 -1.95433 |
|                                        | Cl -4.18760 -1.14789 -0.80991 |                                        | Cl 2.43240 -3.01890 -1.27650  |
|                                        | Cl -3.42291 1.09235 1.93154   |                                        | Cl 0.07534 -3.08117 1.41005   |
|                                        | C 1.85092 0.44884 1.07487     |                                        | C -1.50678 0.71502 1.11934    |

|   |          |          |          |   |          |          |          |
|---|----------|----------|----------|---|----------|----------|----------|
| H | 0.96582  | -0.49282 | 0.56969  | H | -0.38812 | 0.22459  | 0.52423  |
| C | -1.49910 | -3.17635 | 1.00086  | C | 3.48429  | -0.55737 | 1.21480  |
| H | -1.73093 | -3.70516 | 1.92318  | H | 4.05778  | -0.68221 | 2.13242  |
| H | -2.35783 | -2.56506 | 0.73956  | H | 2.92023  | -1.47343 | 1.06135  |
| H | -1.35180 | -3.91815 | 0.22625  | H | 4.18592  | -0.45011 | 0.39466  |
| C | -0.45752 | -1.61555 | 2.59932  | C | 1.72474  | 0.44069  | 2.64065  |
| H | 0.39248  | -1.00102 | 2.87486  | H | 1.04675  | 1.27722  | 2.79495  |
| H | -1.35293 | -1.00005 | 2.59407  | H | 1.15278  | -0.48302 | 2.59436  |
| H | -0.56978 | -2.38051 | 3.36477  | H | 2.39254  | 0.38145  | 3.49861  |
| C | -0.83575 | -2.43853 | -1.93588 | C | 2.86640  | 0.44612  | -1.93612 |
| H | -0.91479 | -3.47871 | -1.64320 | H | 3.80260  | 0.13861  | -1.48322 |
| H | -1.79363 | -1.95439 | -1.77352 | H | 2.29192  | -0.44677 | -2.16309 |
| H | -0.62561 | -2.41398 | -3.00372 | H | 3.09698  | 0.93320  | -2.88276 |
| C | 0.61863  | -0.44090 | -2.02397 | C | 0.82407  | 1.83622  | -1.85753 |
| H | -0.25699 | 0.19137  | -2.14190 | H | 0.20160  | 0.97685  | -2.09721 |
| H | 1.40506  | 0.13029  | -1.54651 | H | 0.23790  | 2.55904  | -1.29828 |
| H | 0.97157  | -0.73978 | -3.00924 | H | 1.13987  | 2.29380  | -2.79397 |
| C | 3.71129  | 0.99556  | -0.48961 | C | -2.39692 | 2.24549  | -0.60142 |
| C | 3.20572  | 0.21472  | 0.55370  | C | -1.61027 | 2.05170  | 0.54427  |
| C | 1.21941  | 1.73073  | 0.76957  | C | -2.60566 | -0.21276 | 0.86016  |
| C | 1.72225  | 2.54641  | -0.25325 | C | -3.41017 | -0.02865 | -0.27180 |
| C | 2.90462  | 2.11957  | -1.07620 | C | -3.06827 | 1.06455  | -1.23942 |
| H | 3.55791  | 2.97763  | -1.24119 | H | -3.95187 | 1.38025  | -1.79226 |
| H | 2.55492  | 1.82907  | -2.07240 | H | -2.37654 | 0.64106  | -1.97902 |
| H | 1.73767  | 0.14639  | 2.11136  | H | -1.11790 | 0.68337  | 2.13421  |
| C | 5.28349  | -1.02147 | 0.63572  | C | -1.04817 | 4.39924  | 0.55986  |
| H | 5.89672  | -1.78884 | 1.08525  | H | -0.53255 | 5.23581  | 1.00828  |
| C | 4.01509  | -0.77708 | 1.11799  | C | -0.93761 | 3.13926  | 1.11165  |
| H | 3.63985  | -1.35055 | 1.95457  | H | -0.33970 | 2.98489  | 1.99828  |
| C | 5.77119  | -0.26439 | -0.42480 | C | -1.83342 | 4.58724  | -0.57153 |
| H | 6.76400  | -0.44646 | -0.80998 | H | -1.92909 | 5.57237  | -1.00515 |
| C | 4.99193  | 0.73916  | -0.96957 | C | -2.50372 | 3.51589  | -1.14241 |
| H | 5.38482  | 1.34757  | -1.77349 | H | -3.11808 | 3.67097  | -2.01908 |

|                                        |    |          |          |          |                                        |    |          |          |          |
|----------------------------------------|----|----------|----------|----------|----------------------------------------|----|----------|----------|----------|
|                                        | C  | -0.48046 | 3.37770  | 1.25432  |                                        | C  | -3.95067 | -2.10296 | 1.51477  |
|                                        | H  | -1.34204 | 3.68930  | 1.82501  |                                        | H  | -4.16249 | -2.90732 | 2.20363  |
|                                        | C  | 0.11400  | 2.16417  | 1.51402  |                                        | C  | -2.88460 | -1.25930 | 1.74304  |
|                                        | H  | -0.27896 | 1.53074  | 2.29626  |                                        | H  | -2.25610 | -1.39959 | 2.61072  |
|                                        | C  | 0.02512  | 4.18511  | 0.24202  |                                        | C  | -4.75085 | -1.91213 | 0.39414  |
|                                        | H  | -0.43646 | 5.13841  | 0.02939  |                                        | H  | -5.58998 | -2.56834 | 0.21226  |
|                                        | C  | 1.11814  | 3.77086  | -0.49781 |                                        | C  | -4.47946 | -0.88062 | -0.49072 |
|                                        | H  | 1.51255  | 4.40913  | -1.27746 |                                        | H  | -5.10685 | -0.73655 | -1.35998 |
| <b>P2 (sextet)</b>                     | Fe | 1.67885  | 0.01729  | -0.00756 | <b>P2-O (sextet)</b>                   | C  | 4.08481  | 0.07203  | 0.40380  |
| B2GP-PLYP+<br>IDSCRF/TZP-<br>DKH(-dfg) | Cl | 2.72834  | 1.73997  | -0.88349 | B2GP-PLYP+<br>IDSCRF/TZP-<br>DKH(-dfg) | C  | 3.53263  | -1.18406 | -0.25071 |
|                                        | Cl | 1.49288  | 0.21940  | 2.18326  |                                        | C  | 2.00514  | -1.29977 | -0.13430 |
|                                        | O  | 0.00681  | -0.00699 | -0.85712 |                                        | N  | 1.49195  | -0.02137 | -0.68762 |
|                                        | N  | -1.36927 | 0.00037  | -0.86109 |                                        | C  | 1.88514  | 1.28022  | -0.10192 |
|                                        | C  | -1.93067 | -1.33104 | -0.29857 |                                        | C  | 3.41992  | 1.29964  | -0.19792 |
|                                        | C  | -1.85581 | -1.26647 | 1.22115  |                                        | H  | 5.16190  | 0.12633  | 0.24609  |
|                                        | H  | -2.32870 | -2.17096 | 1.60353  |                                        | H  | 3.93416  | 0.04090  | 1.48293  |
|                                        | H  | -0.81134 | -1.29941 | 1.52751  |                                        | H  | 3.96545  | -2.08121 | 0.19190  |
|                                        | C  | -2.51277 | -0.02382 | 1.81060  |                                        | H  | 3.79634  | -1.18177 | -1.30972 |
|                                        | H  | -2.37782 | -0.02949 | 2.89090  |                                        | H  | 3.76763  | 2.21152  | 0.28782  |
|                                        | H  | -3.58928 | -0.03608 | 1.63775  |                                        | H  | 3.69065  | 1.36900  | -1.25272 |
|                                        | C  | -3.35484 | -1.53895 | -0.81222 |                                        | O  | 0.01722  | -0.09927 | -0.76420 |
|                                        | H  | -4.10075 | -0.95616 | -0.28957 |                                        | Fe | -1.83844 | 0.13264  | 0.07762  |
|                                        | H  | -3.60057 | -2.58792 | -0.66760 |                                        | Cl | -2.83444 | -0.45347 | -1.77955 |
|                                        | H  | -3.43124 | -1.33384 | -1.88015 |                                        | Cl | -2.11573 | -1.26634 | 1.71174  |
|                                        | C  | -1.06549 | -2.45312 | -0.85700 |                                        | Cl | -2.22672 | 2.20217  | 0.59113  |
|                                        | H  | -1.07273 | -2.45086 | -1.94721 |                                        | H  | -0.13988 | -0.23462 | -1.70787 |
|                                        | H  | -1.49347 | -3.39508 | -0.52088 |                                        | C  | 1.42216  | 1.53802  | 1.33558  |
|                                        | H  | -0.03856 | -2.39890 | -0.51948 |                                        | H  | 1.53556  | 2.59862  | 1.55433  |
|                                        | C  | -1.93061 | 1.32566  | -0.27974 |                                        | H  | 0.37041  | 1.29845  | 1.47319  |
|                                        | C  | -1.88388 | 1.24246  | 1.24075  |                                        | H  | 1.99761  | 0.98492  | 2.06918  |
|                                        | H  | -2.39132 | 2.12842  | 1.62255  |                                        | C  | 1.33610  | 2.37619  | -1.01321 |
|                                        | H  | -0.84805 | 1.30263  | 1.56709  |                                        | H  | 1.57560  | 2.15765  | -2.05235 |
|                                        | C  | -3.34509 | 1.54902  | -0.81359 |                                        | H  | 0.26050  | 2.48939  | -0.90894 |

|                                        |                              |                                        |                               |
|----------------------------------------|------------------------------|----------------------------------------|-------------------------------|
|                                        | H -4.10074 0.95937 -0.31274  |                                        | H 1.79687 3.32530 -0.74417    |
|                                        | H -3.58931 2.59604 -0.65280  |                                        | C 1.59109 -1.64685 1.29753    |
|                                        | H -3.40613 1.36433 -1.88628  |                                        | H 2.08561 -1.03455 2.04302    |
|                                        | C -1.05013 2.45348 -0.80122  |                                        | H 0.51709 -1.56429 1.43570    |
|                                        | H -1.03820 2.47625 -1.89089  |                                        | H 1.86637 -2.68291 1.49097    |
|                                        | H -1.47667 3.39043 -0.44941  |                                        | C 1.53173 -2.41492 -1.06530   |
|                                        | H -0.02919 2.38559 -0.44835  |                                        | H 0.47010 -2.61684 -0.94083   |
|                                        | Cl 2.67670 -1.87980 -0.50708 |                                        | H 1.72755 -2.15355 -2.10431   |
|                                        | H -1.61987 0.00887 -1.85304  |                                        | H 2.07228 -3.33045 -0.83300   |
| <b>INT1a</b> (doublet)                 | C 0.00000 1.39302 0.17751    | <b>TS2</b> (sextet)                    | C 1.30858 -3.87309 -0.40056   |
| B2GP-PLYP+<br>IDSCRF/TZP-<br>DKH(-dfg) | C 1.27166 -0.70120 0.06368   | B2GP-PLYP+<br>IDSCRF/TZP-<br>DKH(-dfg) | C 1.51376 -2.66519 -1.30106   |
|                                        | C 1.24506 0.70510 0.09607    |                                        | C 0.30465 -1.72554 -1.34235   |
|                                        | C -1.24506 0.70512 0.09604   |                                        | N -0.03574 -1.39110 0.07746   |
|                                        | C -1.27167 -0.70119 0.06371  |                                        | C -0.28439 -2.50520 1.04782   |
|                                        | C 0.00000 -1.48849 0.23465   |                                        | C 0.94876 -3.41231 1.00315    |
|                                        | H -0.00000 -2.34429 -0.44235 |                                        | H 2.21949 -4.47168 -0.37154   |
|                                        | H 0.00001 -1.91456 1.24441   |                                        | H 0.52910 -4.52108 -0.80077   |
|                                        | H 0.00001 2.47358 0.21732    |                                        | H 1.73095 -2.97351 -2.32445   |
|                                        | C 3.65596 0.74316 -0.11714   |                                        | H 2.38047 -2.10181 -0.94631   |
|                                        | H 4.57961 1.29982 -0.18546   |                                        | H 0.76242 -4.26311 1.65920    |
|                                        | C 2.45813 1.40885 0.01020    |                                        | H 1.79689 -2.86554 1.42257    |
|                                        | H 2.43603 2.49019 0.03705    |                                        | O -1.07185 -0.47918 0.11813   |
|                                        | C 3.67389 -0.64701 -0.16638  |                                        | Fe -2.65774 0.35732 -0.03423  |
|                                        | H 4.61001 -1.17524 -0.27483  |                                        | Cl -2.39112 2.01788 -1.51655  |
|                                        | C 2.48565 -1.35351 -0.07422  |                                        | Cl -4.27123 -1.01846 -0.73232 |
|                                        | H 2.50217 -2.43547 -0.10706  |                                        | Cl -3.16100 1.16823 2.00435   |
|                                        | C -3.65595 0.74316 -0.11720  |                                        | C 1.89237 0.65383 1.20881     |
|                                        | H -4.57960 1.29981 -0.18559  |                                        | H 1.22964 -0.16989 0.73947    |
|                                        | C -2.45813 1.40886 0.01009   |                                        | C -1.56781 -3.29887 0.78111   |
|                                        | H -2.43602 2.49021 0.03685   |                                        | H -1.80370 -3.88453 1.66870   |
|                                        | C -3.67390 -0.64702 -0.16632 |                                        | H -2.40458 -2.63527 0.58181   |
|                                        | H -4.61002 -1.17526 -0.27470 |                                        | H -1.47316 -3.98852 -0.05054  |
|                                        | C -2.48565 -1.35351 -0.07410 |                                        | C -0.39430 -1.88299 2.43824   |

|  |   |          |          |          |  |   |          |          |          |
|--|---|----------|----------|----------|--|---|----------|----------|----------|
|  | H | -2.50218 | -2.43548 | -0.10686 |  | H | 0.49893  | -1.31356 | 2.68386  |
|  |   |          |          |          |  | H | -1.25901 | -1.22855 | 2.51262  |
|  |   |          |          |          |  | H | -0.49683 | -2.67869 | 3.17456  |
|  |   |          |          |          |  | C | -0.85148 | -2.34049 | -2.13912 |
|  |   |          |          |          |  | H | -1.00686 | -3.38990 | -1.91318 |
|  |   |          |          |          |  | H | -1.78123 | -1.80948 | -1.95517 |
|  |   |          |          |          |  | H | -0.62201 | -2.26343 | -3.20123 |
|  |   |          |          |          |  | C | 0.71337  | -0.42372 | -2.02866 |
|  |   |          |          |          |  | H | -0.11545 | 0.27762  | -2.08032 |
|  |   |          |          |          |  | H | 1.54108  | 0.04730  | -1.50335 |
|  |   |          |          |          |  | H | 1.04611  | -0.64767 | -3.04140 |
|  |   |          |          |          |  | C | 3.79130  | 1.20278  | -0.31946 |
|  |   |          |          |          |  | C | 3.25337  | 0.39647  | 0.71527  |
|  |   |          |          |          |  | C | 1.26871  | 1.92838  | 0.82813  |
|  |   |          |          |          |  | C | 1.84805  | 2.71855  | -0.20866 |
|  |   |          |          |          |  | C | 3.06595  | 2.32612  | -0.75626 |
|  |   |          |          |          |  | H | 3.49564  | 2.93567  | -1.54316 |
|  |   |          |          |          |  | H | 1.79158  | 0.45497  | 2.27518  |
|  |   |          |          |          |  | C | 5.25588  | -0.94500 | 0.64618  |
|  |   |          |          |          |  | H | 5.83408  | -1.77320 | 1.03025  |
|  |   |          |          |          |  | C | 4.01259  | -0.67537 | 1.18641  |
|  |   |          |          |          |  | H | 3.62513  | -1.29115 | 1.98577  |
|  |   |          |          |          |  | C | 5.78196  | -0.15937 | -0.39287 |
|  |   |          |          |          |  | H | 6.75220  | -0.39170 | -0.80480 |
|  |   |          |          |          |  | C | 5.06000  | 0.90444  | -0.87066 |
|  |   |          |          |          |  | H | 5.44726  | 1.52792  | -1.66429 |
|  |   |          |          |          |  | C | -0.51406 | 3.53272  | 0.98452  |
|  |   |          |          |          |  | H | -1.44625 | 3.83733  | 1.43677  |
|  |   |          |          |          |  | C | 0.08495  | 2.36529  | 1.41449  |
|  |   |          |          |          |  | H | -0.38857 | 1.77476  | 2.18461  |
|  |   |          |          |          |  | C | 0.04923  | 4.31422  | -0.04341 |
|  |   |          |          |          |  | H | -0.45134 | 5.21401  | -0.36609 |
|  |   |          |          |          |  | C | 1.21290  | 3.91519  | -0.63678 |

|                                        |                             |                                        |                              |
|----------------------------------------|-----------------------------|----------------------------------------|------------------------------|
|                                        |                             |                                        | H 1.66371 4.49106 -1.43280   |
| <b>PIa</b> (singlet)                   | C 0.00000 1.39934 0.00007   | <b>RIb</b> (singlet)                   | C -1.35755 -1.30482 -0.05190 |
| B2GP-PLYP+<br>IDSCRF/TZP-<br>DKH(-dfg) | C -1.21668 -0.71793 0.00008 | B2GP-PLYP+<br>IDSCRF/TZP-<br>DKH(-dfg) | C -0.00728 -1.02791 0.10330  |
|                                        | C -1.21668 0.71793 0.00007  |                                        | C -2.27991 -0.26441 -0.12541 |
|                                        | C 1.21668 0.71793 0.00007   |                                        | H 0.71029 -1.83530 0.15706   |
|                                        | C 1.21668 -0.71793 0.00007  |                                        | H -3.33190 -0.48041 -0.24473 |
|                                        | C -0.00000 -1.39934 0.00008 |                                        | C 0.44091 0.29120 0.18700    |
|                                        | H -0.00001 -2.48238 0.00008 |                                        | C -1.84341 1.05083 -0.04335  |
|                                        | H 0.00000 2.48238 0.00007   |                                        | H -2.55441 1.86284 -0.10041  |
|                                        | C -3.64087 0.71022 0.00005  |                                        | C -0.48786 1.32478 0.11007   |
|                                        | H -4.58206 1.24122 0.00005  |                                        | H -0.14881 2.35035 0.17287   |
|                                        | C -2.46551 1.40218 0.00006  |                                        | H -1.69411 -2.33009 -0.11238 |
|                                        | H -2.46376 2.48410 0.00005  |                                        | C 1.90923 0.58249 0.33136    |
|                                        | C -3.64087 -0.71022 0.00006 |                                        | H 2.32134 0.05148 1.18702    |
|                                        | H -4.58206 -1.24122 0.00006 |                                        | H 2.05828 1.65168 0.49628    |
|                                        | C -2.46550 -1.40218 0.00007 |                                        | O 2.67302 0.13312 -0.78775   |
|                                        | H -2.46376 -2.48409 0.00007 |                                        | H 2.27909 0.51192 -1.57975   |
|                                        | C 3.64087 0.71022 0.00006   |                                        |                              |
|                                        | H 4.58206 1.24123 0.00007   |                                        |                              |
|                                        | C 2.46551 1.40218 0.00007   |                                        |                              |
|                                        | H 2.46376 2.48410 0.00009   |                                        |                              |
|                                        | C 3.64087 -0.71022 0.00005  |                                        |                              |
| H 4.58207 -1.24122 0.00004             |                             |                                        |                              |
| C 2.46551 -1.40218 0.00005             |                             |                                        |                              |
| H 2.46376 -2.48410 0.00006             |                             |                                        |                              |
| <b>TS1b</b> (quintet)                  | C -2.11220 2.96088 0.02374  | <b>TS1b-O</b> (quintet)                | C -0.73705 4.04513 0.22106   |
| B2GP-PLYP+<br>IDSCRF/TZP-<br>DKH(-dfg) | C -1.49896 2.35092 -1.22686 | B2GP-PLYP+<br>IDSCRF/TZP-<br>DKH(-dfg) | C -0.68383 3.42994 -1.16681  |
|                                        | C -0.06959 1.84162 -1.03743 |                                        | C 0.20166 2.18169 -1.23780   |
|                                        | N -0.06960 0.92102 0.18291  |                                        | N -0.25017 1.28146 -0.14358  |
|                                        | C -0.69837 1.42604 1.48523  |                                        | C -0.43404 1.73360 1.26160   |

|    |          |          |          |    |          |          |          |
|----|----------|----------|----------|----|----------|----------|----------|
| C  | -2.09687 | 1.94668  | 1.15721  | C  | -1.27276 | 3.01525  | 1.20054  |
| H  | -3.13901 | 3.25796  | -0.18541 | H  | -1.38670 | 4.92018  | 0.21312  |
| H  | -1.58160 | 3.86835  | 0.30925  | H  | 0.24964  | 4.39419  | 0.52631  |
| H  | -1.47303 | 3.07408  | -2.04210 | H  | -0.31134 | 4.14295  | -1.90217 |
| H  | -2.12705 | 1.52419  | -1.55952 | H  | -1.69628 | 3.15157  | -1.46686 |
| H  | -2.49883 | 2.38036  | 2.07300  | H  | -1.32785 | 3.42158  | 2.21047  |
| H  | -2.74061 | 1.10520  | 0.89727  | H  | -2.28778 | 2.74293  | 0.90462  |
| O  | 1.15272  | 0.42977  | 0.45625  | O  | 0.36938  | 0.04058  | -0.21652 |
| Fe | 2.62312  | -0.60927 | 0.02576  | Fe | 2.02632  | -0.93087 | 0.18947  |
| Cl | 4.09871  | 0.60217  | -1.06724 | Cl | 3.83359  | 0.21060  | 0.57898  |
| Cl | 3.37750  | -1.33514 | 1.95083  | Cl | 1.48966  | -2.19344 | 1.88107  |
| Cl | 1.92361  | -2.32908 | -1.22727 | Cl | 2.16360  | -2.11307 | -1.69100 |
| C  | -4.82738 | -1.63535 | 0.97289  | C  | -4.22857 | -1.79805 | 1.15422  |
| C  | -3.45453 | -1.75902 | 0.83620  | C  | -3.03442 | -2.11775 | 0.53909  |
| C  | -5.58226 | -1.05230 | -0.03541 | C  | -4.99157 | -0.73229 | 0.69139  |
| H  | -2.87054 | -2.22857 | 1.61312  | H  | -2.43069 | -2.93682 | 0.89920  |
| H  | -6.65241 | -0.95476 | 0.07609  | H  | -5.92310 | -0.48398 | 1.17891  |
| C  | -2.82231 | -1.29881 | -0.31621 | C  | -2.59501 | -1.37686 | -0.55932 |
| C  | -4.96057 | -0.61072 | -1.19524 | C  | -4.56008 | 0.00941  | -0.39789 |
| H  | -5.54539 | -0.17738 | -1.99350 | H  | -5.15574 | 0.83280  | -0.76419 |
| C  | -3.58915 | -0.73650 | -1.33515 | C  | -3.36664 | -0.30961 | -1.02029 |
| H  | -3.11170 | -0.41230 | -2.24984 | H  | -3.03491 | 0.26058  | -1.87582 |
| H  | -5.31079 | -1.99881 | 1.86803  | H  | -4.56821 | -2.37650 | 2.00103  |
| C  | -1.35566 | -1.38252 | -0.47772 | C  | -1.31042 | -1.66495 | -1.19596 |
| H  | -1.01980 | -1.45951 | -1.51089 | H  | -1.20073 | -1.32862 | -2.22925 |
| H  | -0.84062 | -0.16870 | -0.17435 | H  | -0.47409 | -0.77768 | -0.64684 |
| O  | -0.74757 | -2.26742 | 0.36018  | O  | -0.80966 | -2.90670 | -0.93480 |
| H  | 0.14270  | -2.45667 | 0.00533  | H  | 0.07041  | -2.97891 | -1.34170 |
| C  | 0.17413  | 2.49744  | 2.14032  | C  | 0.87342  | 1.96949  | 2.02159  |
| H  | -0.15269 | 2.59393  | 3.17381  | H  | 0.63743  | 2.21230  | 3.05675  |
| H  | 1.21747  | 2.19562  | 2.14216  | H  | 1.49204  | 1.07519  | 2.03595  |
| H  | 0.08356  | 3.47185  | 1.67655  | H  | 1.46363  | 2.78296  | 1.61284  |
| C  | -0.77752 | 0.24067  | 2.44022  | C  | -1.24076 | 0.66762  | 1.99860  |



|   |          |          |          |   |          |          |          |
|---|----------|----------|----------|---|----------|----------|----------|
| H | -1.34065 | -0.58494 | 2.02218  | H | -2.17058 | 0.46231  | 1.47440  |
| H | 0.21445  | -0.11251 | 2.70729  | H | -0.68126 | -0.25848 | 2.10504  |
| H | -1.28422 | 0.57328  | 3.34402  | H | -1.47735 | 1.03428  | 2.99650  |
| C | 0.93252  | 2.98370  | -0.86662 | C | 1.68322  | 2.56165  | -1.18772 |
| H | 0.58765  | 3.75845  | -0.19369 | H | 1.93770  | 3.16525  | -0.32316 |
| H | 1.89279  | 2.60926  | -0.52442 | H | 2.31859  | 1.68084  | -1.18424 |
| H | 1.08000  | 3.43737  | -1.84467 | H | 1.92525  | 3.13768  | -2.07997 |
| C | 0.35201  | 1.03066  | -2.25797 | C | -0.06407 | 1.47160  | -2.56367 |
| H | 1.38041  | 0.69037  | -2.18525 | H | 0.56890  | 0.59516  | -2.68313 |
| H | -0.29570 | 0.17858  | -2.43524 | H | -1.10723 | 1.17148  | -2.63424 |
| H | 0.28273  | 1.68251  | -3.12659 | H | 0.14977  | 2.15595  | -3.38280 |
